# Supplementary material for: Public health concerns for anti-obesity medicines imported for personal use through the internet: a cross-sectional study
Source: PubMed Central journal article supplement — BMJ Open. 2012 May 11;2(3):e000854. doi: 10.1136/bmjopen-2012-000854 (PMC3353131; doi:10.1136/bmjopen-2012-000854), 2012-05-11
Supplement: bmjopen-2012-000854.draft_revisions.pdf [file bmjopen-2012-000854.draft_revisions.pdf]

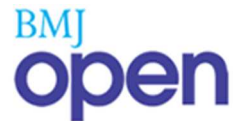

**Public health concerns for anti-obesity medicines imported for personal use through the Internet: a cross-sectional survey**

|                                 |                                                                                                                                                                                                                                                                                                                                                                                                                             |
|---------------------------------|-----------------------------------------------------------------------------------------------------------------------------------------------------------------------------------------------------------------------------------------------------------------------------------------------------------------------------------------------------------------------------------------------------------------------------|
| Journal:                        | <i>BMJ Open</i>                                                                                                                                                                                                                                                                                                                                                                                                             |
| Manuscript ID:                  | bmjopen-2012-000854                                                                                                                                                                                                                                                                                                                                                                                                         |
| Article Type:                   | Research                                                                                                                                                                                                                                                                                                                                                                                                                    |
| Date Submitted by the Author:   | 11-Jan-2012                                                                                                                                                                                                                                                                                                                                                                                                                 |
| Complete List of Authors:       | Khan, Mohiuddin; Kanazawa University, Drug Management and Policy<br>Tanimoto, Tsuyoshi; Doshisha Women's College,<br>Nakanishi, Yoko; Public Health Center, ; Kanazawa University, Drug<br>Management and Policy<br>Yoshida, Naoko; Kanazawa University, Drug Management and Policy<br>Tsuboi, Hirohito; Kanazawa University, Drug Management and Policy<br>Kimura, Kazuko; Kanazawa University, Drug Management and Policy |
| <b>Primary Subject Heading</b>: | Public health                                                                                                                                                                                                                                                                                                                                                                                                               |
| Secondary Subject Heading:      | Global health, Pharmacology and therapeutics, Nutrition and metabolism                                                                                                                                                                                                                                                                                                                                                      |
| Keywords:                       | PUBLIC HEALTH, NUTRITION & DIETETICS, MEDICAL LAW, Quality in health care < HEALTH SERVICES ADMINISTRATION & MANAGEMENT, Health & safety < HEALTH SERVICES ADMINISTRATION & MANAGEMENT                                                                                                                                                                                                                                      |
|                                 |                                                                                                                                                                                                                                                                                                                                                                                                                             |

SCHOLARONE™  
Manuscripts

Only

1  
2  
3  
4  
5  
6  
7  
8  
9  
10  
11  
12  
13  
14  
15  
16  
17  
18  
19  
20  
21  
22  
23  
24  
25  
26  
27  
28  
29  
30  
31  
32  
33  
34  
35  
36  
37  
38  
39  
40  
41  
42  
43  
44  
45  
46  
47  
48  
49  
50  
51  
52  
53  
54  
55  
56  
57  
58  
59  
60

1     **Public health concerns for anti-obesity medicines imported for**  
2           **personal use through the Internet: a cross-sectional survey**

3     Mohiuddin Hussain Khan,<sup>1,\*</sup> Tsuyoshi Tanimoto,<sup>2</sup> Yoko Nakanishi,<sup>1,3</sup> Naoko Yoshida,<sup>1</sup> Hirohito

4     Tsuboi,<sup>1</sup> Kazuko Kimura,<sup>1</sup>

5     <sup>1</sup> Drug Management and Policy, Kanazawa University, Kanazawa City, Ishikawa, Japan

6     <sup>2</sup> Doshisha Women's College, Kyoto, Japan

7     <sup>3</sup> Public Health Center, Sainen 3-4-25, Kanazawa city, Ishikawa, Japan

8     \* **Corresponding author:** Drug Management and Policy, Kanazawa University, Kakuma-machi,

9     Kanazawa City, Ishikawa, Japan 920-1192, Tel./Fax: +81 76 264 6286, E-mail:

10    mohiuddin\_khn@yahoo.com

11    **Running title:** Quality of online anti-obesity medicines

12    **Word counts:** 3,088

13    **Key Words:** Quality, counterfeit medicine, public health, the Internet, anti-obesity

14    medicine

15

1  
2  
3  
4  
5  
6  
7  
8  
9  
10  
11  
12  
13  
14  
15  
16  
17  
18  
19  
20  
21  
22  
23  
24  
25  
26  
27  
28  
29  
30  
31  
32  
33  
34  
35  
36  
37  
38  
39  
40  
41  
42  
43  
44  
45  
46  
47  
48  
49  
50  
51  
52  
53  
54  
55  
56  
57  
58  
59  
60

16 **ABSTRACT**

17 **Objectives:** To explore the circulation of anti-obesity medicines via the Internet and their  
18 quality.

19 **Design:** Cross-sectional survey.

20 **Setting:** Internet pharmacies and pharmaceutical suppliers accessible from Japan.

21 **Participants:** Anti-obesity medicines were purchased using relevant keywords on Japanese  
22 Google search engine. Blogs and advertisement-only sites were excluded.

23 **Primary and secondary outcome measures:** The authenticity of the samples was investigated  
24 in collaboration with the manufacturers of the samples and medicine regulatory authorities. of  
25 Quality of the samples were performed by pharmacopoeial analyses utilizing high performance  
26 liquid chromatography.

27 **Results:** Eighty-two samples were purchased from 36 internet sites. Approximately half of the  
28 sites did not mention a physical address, and 45% of the samples did not contain a package  
29 insert. A variety of custom declarations were made for the shipments of the samples: personal  
30 health items, supplement, medicines, general merchandise, tea and others. Three of the samples  
31 were identified as counterfeits and did not contain any active ingredients according to the  
32 chemical analyses. Two of these samples were confirmed as counterfeits by the manufacturer of  
33 the authentic products. The manufacturer of the other sample did not respond to our request for

1  
2  
3  
4  
5  
6 34 an authenticity check even after several communication attempts. These counterfeit cases have  
7  
8  
9 35 been reported at the rapid alert system of Western Pacific Region of the World Health  
10  
11  
12 36 Organization.

13  
14  
15 37 **Conclusion:** Many counterfeit and unapproved anti-obesity medicines may be easily bypassing  
16  
17  
18 38 regulatory checks during shipping and are widely circulated through the Internet. Regulatory  
19  
20  
21 39 authorities should take measures to prevent these medicines from entering countries to  
22  
23  
24 40 safeguard their citizens.

25  
26 41

27  
28  
29 42

30  
31  
32 43

33  
34  
35 44

36  
37  
38 45

39  
40  
41 46

42  
43  
44 47

45  
46  
47 48

1  
2  
3  
4  
5  
6 49 **ARTICLE SUMMARY**  
7

8  
9 50 **Article Focus**

- 10  
11  
12 51 • Quality of online anti-obesity medicines.  
13  
14  
15 52 • Circulation of unapproved anti-obesity medicines via the Internet.  
16

17  
18 53 **Key Messages**

- 19  
20  
21 54 • Counterfeit and substandard anti-obesity medicines, orlistat are identified.  
22  
23  
24 55 • False and vague custom declarations were made by some of the shipping  
25  
26 56 companies to by-pass regulatory checks of unapproved online medicines.  
27

28  
29 57 **Strength and Limitations**

30  
31  
32 58 Small sample size and low authenticity response rate are limitations of this study.  
33  
34  
35 59 However, the study provides valuable information for regulatory authorities on how  
36  
37  
38 60 unapproved and counterfeit medicines are being circulated through the Internet.  
39  
40  
41 61 Concerted efforts of authentic manufacturers and medicine regulatory authorities are  
42  
43  
44 62 must to combat counterfeits and ensure access of quality medicines to online consumers.  
45  
46  
47  
48  
49  
50  
51  
52  
53  
54  
55  
56  
57  
58  
59  
60

1  
2  
3  
4  
5  
6 **63 INTRODUCTION**  
7  
8

9 64 Over the past decade, the Internet has become an integral part of life for a variety of uses.

10  
11 65 Approximately 60% of Internet users in some developed countries utilize the Internet for their

12  
13  
14 66 health related activities.[1, 2] In fact, when Internet users were asked about specific searches

15  
16  
17 67 related to health, such as diet and fitness information or health insurance materials, 80% of the

18  
19  
20 68 users in a 2002 survey said that they had performed these types of searches.[1] According to a

21  
22  
23 69 survey taken in Japan, a majority (86.3%) of the medicines imported for personal use were

24  
25  
26 70 purchased through the Internet.[3] However, according to World Health Organization, more than

27  
28  
29 71 50% of the medicines from Internet sites, which often conceal their physical address, may be

30  
31  
32 72 counterfeit or of substandard quality.[4]  
33  
34  
35  
36  
37  
38  
39  
40  
41  
42  
43  
44  
45  
46  
47  
48  
49  
50  
51  
52  
53  
54  
55  
56  
57  
58  
59  
60

73

74 Obesity is becoming a major public health epidemic in this century and is associated with an

75 increased risk for a number of health problems, such as hypertension, dyslipidemia, type 2

76 diabetes, and cardiovascular diseases.[5] The prevalence of obesity and its associated conditions

77 are increasingly affecting both developed and developing countries over the last few decades.[6]

78 Studies suggest that primarily adolescent and adult males are overweight or obese in Japan.[7]

79 Recommended strategies for managing weight and obesity include lifestyle changes with

80 appropriate dietary management and exercise. However, individuals with an isolated BMI $\geq$ 30

1  
2  
3  
4  
5  
6 81 kg m<sup>-2</sup> or a BMI>27 kg m<sup>-2</sup> with co-morbidities such as type 2 diabetes, cardiovascular  
7  
8  
9 82 diseases, and obstructive sleep apnea, should receive pharmacotherapy as well.[8] Among the  
10  
11  
12 83 available anti-obesity medicines, phentermine, diethylpropion and orlistat are approved by the  
13  
14  
15 84 U.S. Food and Drug Administration, but sibutramine has been withdrawn from the market.[9,  
16  
17  
18 85 10] Of these anti-obesity medicines, only mazindol has been approved for use in Japan.[11]  
19  
20  
21 86 However, several of these anti-obesity medicines are among those that are frequently imported  
22  
23  
24 87 into Japan for personal use.[12]  
25  
26  
27 88  
28  
29 89 The online purchase of medicine through the Internet is a growing and convenient practice for  
30  
31  
32 90 many consumers. This practice has also become one of the most popular, easiest and safest  
33  
34  
35 91 routes for counterfeit medicine traders.[4, 13-15] Because lifestyle medicines are frequently  
36  
37  
38 92 targeted by counterfeiters, a collaborative investigation between the Ministry of Health and  
39  
40  
41 93 Labour Welfare (MHLW), Japan; Kanazawa University, Kanazawa; and Doshisha Women's  
42  
43  
44 94 College, Kyoto, Japan was conducted to survey the quality of anti-obesity medicines that were  
45  
46  
47 95 purchased through online medicine sites. This investigation also provided an understanding of  
48  
49  
50 96 the process by which unapproved medicines are being imported for and used by consumers in  
51  
52  
53 97 Japan.  
54  
55  
56 98  
57  
58  
59  
60

1  
2  
3  
4  
5  
6 99 **METHODS**

7  
8  
9 100 **Study design**

10  
11 101 Quality of online anti-obesity medicines was assessed using an online cross-sectional survey  
12  
13 102 during August 2009.  
14  
15  
16

17  
18 103

19  
20  
21 104 **Selection of Internet sites and sample collection**

22  
23 105 The Japanese keywords personal import agent, diet, and anti-obesity medicines were used on  
24  
25 106 the Japanese Google search engine (www.google.co.jp) to find online pharmacies or suppliers  
26  
27 107 that offer anti-obesity medicines. Searches were also made on websites that advertise and sell  
28  
29 108 counterfeit Cialis, Levitra and Viagra. The physical characteristics of original and counterfeit  
30  
31 109 Cialis and Levitra were both identified earlier by the Ministry of Health, Japan, and information  
32  
33 110 on websites that sell counterfeit Viagra was provided by Pfizer.[16] After the exclusion of blogs  
34  
35 111 and advertisement-only sites, 36 sites were chosen for the purchase of anti-obesity medicines.  
36  
37 112 Some of the criteria used in choosing the sites included the absence of a physical address and  
38  
39 113 the presence of suspicious advertisements. A list of overweight/anti-obesity medicines was  
40  
41 114 sought on each of the selected sites. Priority rankings were made of the list of medicines  
42  
43 115 according to their vertical or horizontal placement on the web pages. Samples of the anti-obesity  
44  
45 116 medicines were purchased from selected sites according to the smallest priority number found  
46  
47  
48  
49  
50  
51  
52  
53  
54  
55  
56  
57  
58  
59  
60



1  
2  
3  
4  
5  
6 117 for a medicine that had not been purchased from a previous website.  
7  
8

9 118

10  
11 119 Information on the site's name, URL, compliance with Japanese rules of "Act on Specified  
12

13  
14 120 Commercial Transaction" (ASCT), e-mail address, the name of the product and other  
15

16  
17 121 information such as the dosage, efficacy and side effects, recommendation on consultation with  
18

19  
20 122 doctors or pharmacists or opportunities for consultation were recorded while examining the sites  
21

22  
23 123 from which at least one product was purchased.  
24

25  
26 124

27  
28  
29 125 **Observational analysis**  
30

31  
32 126 All of the samples were given distinct codes when the shipments were received. The name of  
33

34  
35 127 the product, dosage form, content information from the printed label, the manufacturers' name  
36

37  
38 128 and address, the country of origin, the manufacture and expiration dates, lot, registration and  
39

40  
41 129 license numbers, Japanese manual, information from the shipping company, the sending country,  
42

43  
44 130 the date of shipment and arrival, and customs declaration notations were recorded for each of  
45

46  
47 131 the samples.  
48

49  
50 132

51  
52 133 **Chemical analysis**  
53

54  
55 134 Pharmacopoeial procedures for the analysis of the samples were established and performed  
56  
57  
58  
59  
60

1  
2  
3  
4  
5  
6 135 using high performance liquid chromatography (HPLC), which are described briefly below.  
7  
8

9 136

10  
11 137 Preparation of the sample solutions

12  
13  
14 138 Randomly selected capsules of orlistat and sibutramine samples were weighed accurately. After

15  
16  
17 139 each capsule was weighed, the contents were removed, and the empty capsule shells were

18  
19  
20 140 subsequently weighed. The difference between the weight of the whole capsule and the capsule

21  
22  
23 141 shell was assumed to be the weight of the contents. Approximately 80 ml of methanol was

24  
25  
26 142 added to the capsule's contents, and the mixture was sonicated for 30 min. After sonication,

27  
28  
29 143 methanol was then added to a volume of 100 ml. The resulting solutions were filtered through a

30  
31  
32 144 membrane filter (pore size: 0.45  $\mu\text{m}$ ) and used as the sample solutions.  
33

34  
35 145

36  
37  
38 146 To prepare sample solutions of lovastatin, benfluorex and rimonabant tablets, randomly chosen

39  
40  
41 147 tablets were weighed accurately and subsequently crushed separately into powder.

42  
43  
44 148 Approximately 80 ml of methanol was added to the powder, and the solutions were sonicated

45  
46  
47 149 for 30 min. Methanol was added to each of the solutions to a volume of 100 ml. The resulting

48  
49  
50 150 solutions were filtered through membrane filters (pore size: 0.45  $\mu\text{m}$ ) and used as the sample

51  
52  
53 151 solutions.  
54

55 152  
56  
57  
58  
59  
60

1  
2  
3  
4  
5  
6 153 Preparation of standard solutions  
7

8  
9 154 Three consecutive strengths of standard solutions were prepared by dissolving 0.375 mg, 0.75  
10

11  
12 155 mg and 1.50 mg of orlistat; 0.050 mg, 0.100 mg and 0.200 mg of sibutramine; 0.100 mg, 0.200  
13

14  
15 156 mg and 0.500 mg of lovastatin; 0.100 mg, 1.50 mg and 2.00 mg of benfluorex; 0.100 mg, 0.200  
16

17  
18 157 mg and 0.500 mg of rimonabant in 1 ml of methanol for each solution.  
19

20  
21 158  
22

23 159 Assay condition  
24

25  
26 160 Ten microliters of each sample solution and standard solution was placed in vials and assayed  
27

28  
29 161 using a photodiode array of 225 nm wavelength (200-400 nm range for spectra) with a stainless  
30

31  
32 162 steel column with a 4.6 mm internal diameter and 15 cm length packed with octadecylsilanized  
33

34  
35 163 silica gel for liquid chromatography (5  $\mu$ m particle diameter) used with Mightysil RP-18 GP  
36

37  
38 164 150-4.6. The column temperature was maintained at 45°C. A mixture of methanol and phosphate  
39

40  
41 165 buffer, pH 7.0 (17:3) was used as the mobile phase at a flow rate of 1.2 ml/min.  
42

43  
44 166  
45

46  
47 167 **Authenticity investigation**  
48

49  
50 168 A catalogue and a questionnaire for all the samples were created that included the information  
51

52  
53 169 from the printed labels of the product packages. The printed information was also checked  
54

55  
56 170 against the information on the manufacturers' websites. The questionnaires were sent to the  
57  
58  
59  
60

1  
2  
3  
4  
5  
6 171 appropriate manufacturers with a portion of the samples for verification of their authenticity.  
7

8  
9 172 The regulatory authorities for medicine in the country of origin were also contacted to verify the  
10

11  
12 173 legitimacy of the products and their approval for marketing. After considering the WHO  
13

14  
15 174 definition of counterfeit medicines, the gathered information was analyzed to determine the  
16

17  
18 175 authenticity of the individual samples and their manufacturers.[17, 18]  
19

20  
21 176  
22

23  
24 177 **Statistical analysis**  
25

26  
27 178 Because of the small size of the sample, descriptive statistical analysis was performed using  
28

29  
30 179 Microsoft Excel.  
31

32  
33 180  
34

35  
36 181 **RESULTS**  
37

38  
39 182 A total of 82 samples from 31 varieties of anti-obesity products were purchased from 36 internet  
40

41  
42 183 sites. Some of these products were shipped in divided shipments and treated as distinct samples.  
43

44  
45 184 Of the selected internet sites, 15 sites did not show a physical address, and six, two and nine of  
46

47  
48 185 the web sites advertised counterfeit Cialis, Levitra and Viagra, respectively. Two of the sites  
49

50  
51 186 with fake Cialis and Viagra also did not show a physical address. Four of the websites were  
52

53  
54 187 hosted by domestic shipping companies.  
55

56  
57 188  
58  
59  
60

1  
2  
3  
4  
5  
6 189 **Information available on the web sites**  
7

8  
9 190 Different levels of compliance with ASCT were observed throughout all (36) of the web sites.  
10  
11 191 For instance, all (100%) of them mentioned the selling price, shipping charges for the goods,  
12  
13 192 and methods of payment. However, only 21 (58.3%) of them provided telephone numbers, and  
14  
15 193 only 17 (47.2%) of them mentioned a physical address.  
16  
17  
18  
19

20  
21 194

22  
23 195 Information for e-mail addresses and shipment procedures were presented on all of the selected  
24  
25 196 sites. However, only 21 (58.3%) of them encouraged consumers to consult with a physician or  
26  
27 197 pharmacist. Consultation services were available at two (5.5%) of the sites. Dosage and  
28  
29 198 administration, effects and efficacy, and side effects related to the products were explained in 18  
30  
31 199 (50%), 23 (63.8%) and 17 (47.2%) of the sites, respectively, despite the prohibition on  
32  
33 200 advertisements for unapproved medicines.  
34  
35  
36  
37  
38  
39

40  
41 201

42 202 **Information provided with the samples**  
43

44  
45  
46 203 Upon examination of the printed materials, the languages of the package inserts were found to  
47  
48 204 be in English for 17.1% of the samples, Chinese for 15.9%, both Chinese and Korean for 12.2%,  
49  
50 205 both English and Chinese for 4.9%, Turkish for 2.4%, both English and Thai for 1.2%, and  
51  
52 206 English, Chinese and Russian for 1.2% of the samples. However, 45.1% (37) of the samples did  
53  
54  
55  
56  
57  
58  
59  
60

1  
2  
3  
4  
5  
6 207 not have any package inserts.  
7  
8

9 208

10  
11 209 **Shipment of the samples**

12  
13  
14 210 Samples were sent by 29 different shipping companies. The majority (13 companies) shipped  
15  
16  
17 211 from China, and the second largest group was from India (4 companies). Others were shipped  
18  
19  
20 212 from the USA (3), Japan (2), Thailand (2), Switzerland (1), Hong Kong (1), Cambodia (1), the  
21  
22  
23 213 Fiji Islands (1), and Puerto Rico (1). The customs declaration was 'health product/personal  
24  
25  
26 214 health items' for 20 (24.4%) of the samples, 'supplement' for 13 (15.9%) of the samples,  
27  
28  
29 215 'medicine' for 10 (12.2%) of the samples and the actual name of the product in 2 (2.4%) cases.  
30  
31  
32 216 However, 12 (14.7%) of the samples were shipped with a declaration of general merchandise  
33  
34  
35 217 and/or tea, 11 (13.4%) of them declared 'other' and 14 (17.1%) of them did not mention  
36  
37  
38 218 anything as the declaration. Interestingly, one representative from an importing agent of a diet  
39  
40  
41 219 medicine clinic (Sabairato Yanhee MD and clinic, <http://www.gop23.com>) inquired over the  
42  
43  
44 220 telephone regarding the purpose for our purchase of the medicine and asked if we had any  
45  
46  
47 221 relationship with the MHLW, Japan; they did not sell their products to us.

48  
49 222

50  
51  
52 223 **Sample characteristics**

53  
54  
55 224 Of the 82 samples, 43 (52.4%) were advertised on the websites as containing sibutramine  
56  
57  
58  
59  
60

1  
2  
3  
4  
5  
6 225 hydrochloride and 15 (18.3%) were advertised as orlistat. Rimonabant, benfluorex, and  
7  
8  
9 226 lovastatin were advertised to be in two (2.4%) of the samples. Rhei rhubarb was said to be in  
10  
11  
12 227 one, and the remaining 17 (20.7%) samples were advertised to be herbal products. The results of  
13  
14  
15 228 the rhubarb and herbal products will be reported elsewhere. Out of the 64 synthetic products, 58  
16  
17  
18 229 samples from 19 different products were prescription medicines, five brands of orlistat were  
19  
20  
21 230 over-the-counter medicines, and one sample, Daidai hua, was marketed as a natural supplement.  
22  
23  
24 231 However, this product was advertised as sibutramine by its agent, and the sample actually  
25  
26  
27 232 contained sibutramine as shown by chemical analysis.

28  
29  
30 233

### 31 32 234 **Quality analysis**

33  
34  
35 235 Quantitative analysis by HPLC showed that all (21) of the samples of sibutramine were in the  
36  
37  
38 236 acceptable range (90%-110%) except one (mean content percentage of  $60.2 \pm 7.6$ ). No active  
39  
40  
41 237 ingredient was detected in three out of the 13 samples of orlistat that we tested (Figure 1). These  
42  
43  
44 238 three samples were identified to be counterfeit. Of these three counterfeit samples, two were  
45  
46  
47 239 found to be Xenical after analysis by the researchers and the manufacturer of the genuine  
48  
49  
50 240 products. No active ingredient was detected in the last sample, only starch (Figure 1). The other  
51  
52  
53 241 counterfeit sample contained unknown excipients. None of the samples of lovastatin, benfluorex  
54  
55  
56 242 or rimonabant failed the HPLC analysis.

243

244 **Authenticity investigation**

245 Responses to our requests for authentication were received from only five of the 20  
 246 manufacturing companies of the genuine samples. According to the responses that we received,  
 247 all of the responding manufacturers were GMP compliant. Of the 12 reported samples, two of  
 248 the orlistat samples (Xenical) from the same manufacturer were confirmed to be counterfeit  
 249 (Table 1).

250 Table 1. Results of Authenticity Investigation

| Active ingredient   | Country of<br>Authorized<br>Marketer | Genuine | Counterfeit | Manufacturing |
|---------------------|--------------------------------------|---------|-------------|---------------|
|                     |                                      | sample  | sample      | License       |
| Orlistat (60 mg)    | USA                                  | 5       | 0           | YES           |
| Benfluorex (150 mg) | France                               | 2       | 0           | YES           |
| Rimonabant (20 mg)  | India                                | 1       | 0           | YES           |
| Orlistat (120 mg)   | Switzerland                          | 1       | 2           | YES           |
| Rhei Rhubarb        | China                                | 1       | 0           | YES           |
| *Orlistat (120 mg)  | India                                | 0       | 1           | Unknown       |

251 \* labeled manufacturer did not reply



1  
2  
3  
4  
5  
6 252  
7  
8

9 253 The counterfeit samples were purchased at [www.kenkoclinic.com](http://www.kenkoclinic.com) and sent to us from Puerto  
10  
11  
12 254 Rico. They bore the same manufacture and expiration dates (MFD: 02/2011 and EXP: 02/2011,  
13  
14  
15 255 Figure 2) on their blisters, which had not yet occurred at the time of our investigation. The  
16  
17  
18 256 printed information on the blisters of the counterfeits was a different color with a similar but  
19  
20  
21 257 slightly different logo (Figure 3).  
22

23  
24 258

25  
26 259 Telephone communications were made to the manufacturer of Zenigal (orlistat 120 mg) in India,  
27  
28  
29 260 which did not contain any of the active ingredients that had been claimed on the product labels.  
30  
31  
32 261 However, the manufacturer did not respond after several communication attempts. This  
33  
34  
35 262 counterfeit Zenigal sample was sent to us from Japan. We reported these three cases of  
36  
37  
38 263 counterfeit medicines at the rapid alert system of the Western Pacific Region of the World  
39  
40  
41 264 Health Organization.  
42

43  
44 265

45  
46 266 Responses were received from the medical regulatory authorities of three countries (Germany,  
47  
48  
49 267 Switzerland and USA) for five of the manufacturers. Their responses stated that only orlistat has  
50  
51  
52 268 approval to be manufactured in Switzerland. Approval for the manufacture of sibutramine in  
53  
54  
55 269 Germany was suspended in January 2010, and it was not approved for use in the USA.  
56  
57  
58  
59  
60

1  
2  
3  
4  
5  
6 270 **DISCUSSION**

7  
8  
9 271 **Provided information on the samples**

10  
11 272 According to the Pharmaceutical Affairs Law in Japan, advertising of unapproved medicines is  
12  
13 273 prohibited, and Customs should seize any shipment of prescription medicines when the amount  
14  
15 274 exceeds more than a one-month dose or any non-prescription medicines that exceed more than a  
16  
17 275 two-month dose. However, at least some of the samples in this study that exceeded the approved  
18  
19 276 amount for shipment made it through the regulatory checks during shipping.[19] Surprisingly, at  
20  
21 277 least four of the shipping companies are conducting business in Japan. Contact information was  
22  
23 278 not provided on many of the sites (52.8%), which seemingly contradicts ASCT.[20] According  
24  
25 279 to our study, nearly fifty percent of the sites mentioned dosage administration, effects or  
26  
27 280 side-effects of the medicines, which are not permitted by the pharmaceutical affairs laws (PAL)  
28  
29 281 in Japan.[19] As found in many previous studies on e-medicines, approximately 50% of the  
30  
31 282 samples did not contain a package insert.[21-25] Moreover, several of the weight-loss products  
32  
33 283 may contain harmful or contraindicated ingredients.[16, 21]

34  
35  
36  
37  
38  
39  
40  
41  
42  
43  
44  
45  
46 284

47  
48  
49 285 **Approval status of the products**

50  
51 286 The majority of the study samples were sibutramine, which is a selective inhibitor of the central  
52  
53 287 neuronal reuptake of serotonin and noradrenaline and reduces food intake and body weight.[26]  
54  
55  
56  
57  
58  
59  
60

1  
2  
3  
4  
5  
6 288 However, after conclusion of the safety review of sibutramine, the European Medicines Agency  
7  
8  
9 289 (EMA) has suspended its marketing authorization in the European Union (EU).[27] A recently  
10  
11  
12 290 published study reported that generic Figurer (sibutramine 10 mg), even though it has not been  
13  
14  
15 291 reviewed by the responsible government (USA, the exporting nation), is freely circulating via  
16  
17  
18 292 the Internet, which is a serious concern for public health.[22] According to the medicine  
19  
20  
21 293 regulations of Hong Kong, Figurer does not need manufacturing authorization because the  
22  
23  
24 294 medicine is manufactured in a foreign country. The authorization status of Ali (orlistat 60 mg) as  
25  
26  
27 295 a prescription medicine has been recommended to transition to a non-prescription medicine in  
28  
29  
30 296 the EU.[28] In a questionnaire conducted by community pharmacists in Great Britain, orlistat is  
31  
32  
33 297 suspected to be misused by consumers, as stated in their responses.[29] Similarly, safety profiles  
34  
35  
36 298 of other anti-obesity agents are generating controversy in different parts of the world.[30-33]  
37  
38  
39 299 Even though all the anti-obesity agents sampled in this survey are unapproved in Japan, it is  
40  
41  
42 300 possible that anyone can procure these items without declaring the actual contents during  
43  
44  
45 301 shipping.

46  
47 302

### 48 49 303 **Authenticity and quality of the samples**

50  
51  
52 304 As similarly shown in previous studies, we observed low rates of authenticity.[34] Responses  
53  
54  
55 305 from only five (25%) of the manufacturers for 14.6% of the samples were received. The  
56  
57  
58  
59  
60

1  
2  
3  
4  
5  
6 306 counterfeit samples identified in this survey were confirmed by the manufacturer of the  
7  
8  
9 307 corresponding genuine products. Counterfeiting of anti-obesity medicines, particularly orlistat,  
10  
11  
12 308 has been previously reported.[35, 36] Based on the external characteristics of the counterfeits,  
13  
14  
15 309 these products most often differ in their printed information, design, color, etc. from those of the  
16  
17  
18 310 genuine drugs.[37, 38] As shown in some other studies, the counterfeits detected in this survey  
19  
20  
21 311 did not contain any active ingredients.[34, 39] It is not clear why the manufacture of Zenigal,  
22  
23  
24 312 which failed the content analysis, did not respond to our authentication request. In such a case, it  
25  
26  
27 313 can be assumed that the manufacturer is already aware of the distribution of low-quality  
28  
29  
30 314 products in the pharmaceutical market. Several reports suggest that patients have sought  
31  
32  
33 315 medical treatment for life-threatening complications after the consumption of fake or  
34  
35  
36 316 substandard medicines purchased online.[40] When products are purchased through the Internet  
37  
38  
39 317 and the sites are not sufficiently regulated, customers are left to accept the consequences.

40  
41 318  
42  
43  
44 319 One of the limitations of the study might be small sample size, which may restrict study  
45  
46  
47 320 findings to Japan. Further evaluation with a representative sample may provide more  
48  
49  
50 321 information on the extent of the problem. Low response rate of authenticity investigation may  
51  
52  
53 322 also be considered as a limiting factor. However, better communication and cooperation among  
54  
55  
56 323 authentic manufacturers and medicine regulatory authorities may increase response rate and

1  
2  
3  
4  
5  
6 324 generate more information to counteract against counterfeits.  
7  
8

9 325  
10

## 11 326 **CONCLUSIONS**

12  
13  
14 327 It is evident from this study that counterfeit, unapproved and suspended anti-obesity medicines  
15  
16

17 328 are circulating via the Internet. Because of gaps and the insufficient monitoring system of  
18  
19

20 329 imports for personal use in the rapidly growing e-commerce environment, these medicines can  
21  
22

23 330 easily enter into the distribution channels for pharmaceuticals and may pose health hazards for  
24  
25

26 331 consumers.  
27  
28

29 332  
30  
31

32 333 **Acknowledgements** We gratefully acknowledge the cooperation received from the staff of  
33  
34

35 334 MHLW. Additionally, we thank Ms. Hitomi Tabata for her cooperation in this work.  
36  
37

38 335  
39  
40

41 336 **Funding** This study was supported by Health and Labour Sciences Research Grants from the  
42  
43

44 337 MHLW, Japan.  
45  
46

47 338  
48  
49

50 339 **Competing interests** The authors declare no conflict of interest.  
51  
52

53 340  
54  
55

56 341  
57  
58  
59  
60

1  
2  
3  
4  
5  
6 342 **Authors' contribution** MHK, TT, YN, and KK participated in the conception and design of the  
7  
8  
9 343 study; TT, YN and KK participated in sampling activities and analysis of the samples; MHK, TT,  
10  
11 344 YN, NY, HT and KK participated in data analysis and interpretation of results. MHK wrote the  
12  
13  
14 345 first draft of the manuscript. All authors contributed in the critical review of the draft manuscript,  
15  
16  
17 346 editing and finally approved its submitted version.  
18  
19

20  
21 347

22  
23 348 **Data sharing statement** No additional data available.  
24  
25

26 349  
27  
28  
29  
30  
31  
32  
33  
34  
35  
36  
37  
38  
39  
40  
41  
42  
43  
44  
45  
46  
47  
48  
49  
50  
51  
52  
53  
54  
55  
56  
57  
58  
59  
60

350 **REFERENCES**

- 351 1. Madden M. America's Online Pursuits: The changing picture of who's online and  
352 what they do. Washington D. C.: Pew Internet 22 December 2003.
- 353 2. Atkinson NL, Saperstein SL, Pleis J. Using the Internet for Health-Related  
354 Activities: Findings From a National Probability Sample. *J Med Internet Res* 2009;11(1):e4.
- 355 3. Araki R, Okumura J, Akazawa M, et al. A survey on the awareness of consumers on  
356 their personal import of medicines from public health view point. *Japanese Journal of Social*  
357 *Pharmacy* 2010;28(3):134-5.
- 358 4. WHO. Medicines: counterfeit medicines. Geneva: World Health Organization;  
359 2010 [cited 8 March 2010]; Fact sheet No. 275]. Available from:  
360 <http://www.who.int/mediacentre/factsheets/fs275/en/index.html>.
- 361 5. WHO. 2008-2013 Action Plan for the Global Strategy for the Prevention and  
362 Control of Noncommunicable Diseases. Organization WH, editor. Geneva: World Health  
363 Organization; 2008.
- 364 6. James WPT. The epidemiology of obesity: the size of the problem. Blackwell  
365 Publishing Ltd; 2008. p. 336-52.
- 366 7. Moreno LA, Pigeot I, Ahrens W, et al. Prevalence of Overweight and Obesity in  
367 Japan. *Epidemiology of Obesity in Children and Adolescents*: Springer New York; 2011. p.

- 1  
2  
3  
4  
5  
6 368 153-62.  
7  
8  
9 369 8. Snow V, Barry P, Fitterman N, et al. Pharmacologic and Surgical Management of  
10  
11 370 Obesity in Primary Care: A Clinical Practice Guideline from the American College of  
12  
13 371 Physicians. *Ann Intern Med*, 2005;142(7):525-31.  
14  
15  
16  
17 372 9. Lowes R, Waknine Y. FDA Announces Sibutramine Has Been Withdrawn From the  
18  
19 373 Market. *Medscape Education* [serial on the Internet]. 2010 [cited 25 October 2011]:  
20  
21 374 Available from: <http://www.medscape.org/viewarticle/730515>.  
22  
23  
24  
25  
26 375 10. FDA. FDA Drug Safety Communication: FDA Recommends Against the Continued  
27  
28 376 Use of Meridia (sibutramine). Rockville, MD 2010 [updated 8 October 2010; cited 2011, 25  
29  
30 377 October]; Available from: <http://www.fda.gov/Drugs/DrugSafety/ucm228746.htm>.  
31  
32  
33  
34  
35 378 11. MHLW. Authorization status of drugs in Japan. Tokyo: Ministry of Health and  
36  
37 379 Labour Welfare; 2011 [cited 2011 June 30]; Available from:  
38  
39 380 [http://www.info.pmda.go.jp/psearch/html/menu\\_tenpu\\_base.html](http://www.info.pmda.go.jp/psearch/html/menu_tenpu_base.html).  
40  
41  
42  
43  
44 381 12. Tsuji K, Tsutani K. Personal imports of drugs to Japan in 2005 – an analysis of  
45  
46 382 import certificates. *J Clin Pharm Ther* 2008;33(5):545-52.  
47  
48  
49 383 13. E. deKieffer D. The Internet and the Globalization of Counterfeit Drugs. *Journal of*  
50  
51 384 *Pharmacy Practice*, 2006;19(3):171-7.  
52  
53  
54  
55 385 14. Jackson G. Faking it: the dangers of counterfeit medicine on the internet. *Int J Clin*  
56  
57  
58  
59  
60



- 1  
2  
3  
4  
5  
6 386 Pract 2009;63(2):181.  
7  
8  
9 387 15. Bogenschutz MP. Drugs on the Internet. Am J Psychiatry, 2001;158(12):2094-a-5.  
10  
11  
12 388 16. MHLW. Warning on health hazard due to counterfeit medicines. Tokyo: Ministry  
13  
14  
15 389 of Health and Labour Welfare; 2011 [cited 4 October 2011]; Available from:  
16  
17 390 <http://www.mhlw.go.jp/stf/houdou/2r9852000001agwf-att/2r9852000001ah0e.pdf>.  
18  
19  
20 391 17. Aka E, Legris C, Tanimoto T, et al. Counterfeit medicine detection by authenticity  
21  
22 392 investigation: A pilot study in the street market of Côte d'Ivoire. Japanese Journal of Social  
23  
24 393 Pharmacy 2005;24(2):7-16.  
25  
26  
27 394 18. WHO. Counterfeit Drugs: Guidelines for the development of measures to combat  
28  
29 395 counterfeit drugs Geneva, Switzerland: Department of Essential Drugs and Other  
30  
31 396 Medicines, World Health Organization 1999. Report No.: (WHO/EDM/QSM/99.1).  
32  
33  
34 397 19. MHLW. Pharmaceutical affairs law, Japan. Tokyo: Ministry of Health and Labour  
35  
36 398 Welfare; 2011 [cited 4 October 2011]; Available from:  
37  
38 399 <http://www.houko.com/00/01/S35/145.HTM>.  
39  
40  
41 400 20. Specified Commercial Transaction Law to Regulate Mail-order Business, (1976).  
42  
43  
44 401 21. Nazeri A, Massumi A, Wilson JM, et al. Arrhythmogenicity of weight-loss  
45  
46 402 supplements marketed on the Internet. Heart Rhythm 2009;6(5):658-62.  
47  
48  
49 403 22. Kimura K, Honma T, Tanimoto T, et al. Public Health Implication of Personal  
50  
51  
52  
53  
54  
55  
56  
57  
58  
59  
60

- 1  
2  
3  
4  
5  
6 404 Import of Medicines through Internet Brokers (2): Buying Anti-obesity Agents On-line. J  
7  
8  
9 405 Health Care & Society 2011;21:55-67.  
10  
11  
12 406 23. Veronin MA, Youan B-BC. Magic Bullet Gone Astray: Medications and the Internet.  
13  
14  
15 407 Science, 2004;305(5683):481.  
16  
17  
18 408 24. Martin-Facklam M, Kostrzewa M, Schubert F, et al. Quality markers of drug  
19  
20  
21 409 information on the internet: an evaluation of sites about St. John's Wort. The American  
22  
23  
24 410 Journal of Medicine 2002;113(9):740-5.  
25  
26  
27 411 25. Westenberger BJ, Ellison CD, Fussner AS, et al. Quality assessment of internet  
28  
29  
30 412 pharmaceutical products using traditional and non-traditional analytical techniques. Int J  
31  
32  
33 413 Pharm 2005;306(1-2):56-70.  
34  
35  
36 414 26. Tziomalos K, Krassas GE, Tzotzas T. The use of sibutramine in the management of  
37  
38  
39 415 obesity and related disorders: An update. Vascular Health and Risk Management  
40  
41  
42 416 2009;5:441-52.  
43  
44  
45 417 27. EMEA. European Medicines Agency recommends suspension of marketing  
46  
47  
48 418 authorisation for Sibutramine. London: European Medicines Agency; 2010 [updated 21  
49  
50  
51 419 January 2010; cited 9 June 2011,]; Available from:  
52  
53  
54 420 [http://www.ema.europa.eu/ema/index.jsp?curl=pages/news\\_and\\_events/news/2010/01/news\\_](http://www.ema.europa.eu/ema/index.jsp?curl=pages/news_and_events/news/2010/01/news_)  
55  
56 421 [detail\\_000985.jsp&murl=menus/news\\_and\\_events/news\\_and\\_events.jsp&mid=WC0b01ac05](http://www.ema.europa.eu/ema/index.jsp?curl=pages/news_and_events/news/2010/01/news_detail_000985.jsp&murl=menus/news_and_events/news_and_events.jsp&mid=WC0b01ac05)  
57  
58  
59  
60

- 1  
2  
3  
4  
5  
6 422 [8004d5c1](#).  
7  
8  
9 423 28. EMEA. European Medicines Agency recommends first switch from prescription  
10  
11  
12 424 only to non-prescription for a centrally authorised medicine. Doc. Ref.  
13  
14  
15 425 EMEA/CHMP/493770/2008. 2008 [cited 24 June 2011]; Available from:  
16  
17  
18 426 [http://www.ema.europa.eu/ema/index.jsp?curl=pages/news\\_and\\_events/news/2009/11/news\\_](http://www.ema.europa.eu/ema/index.jsp?curl=pages/news_and_events/news/2009/11/news_)  
19  
20  
21 427 [detail\\_000256.jsp&murl=menus/news\\_and\\_events/news\\_and\\_events.jsp&mid=WC0b01ac05](http://www.ema.europa.eu/ema/index.jsp?curl=pages/news_and_events/news/2009/11/news_detail_000256.jsp&murl=menus/news_and_events/news_and_events.jsp&mid=WC0b01ac05)  
22  
23  
24 428 [8004d5c1&jsenabled=true](#).  
25  
26  
27 429 29. Weidmann A, Cunningham S, Gray G, et al. Over-the-counter orlistat: early  
28  
29 430 experiences, views and attitudes of community pharmacists in Great Britain. International  
30  
31  
32 431 Journal of Clinical Pharmacy 2011;1-7.  
33  
34  
35 432 30. Alsheikh-Ali AA, Karas RH. Safety of Lovastatin/Extended Release Niacin  
36  
37  
38 433 Compared With Lovastatin Alone, Atorvastatin Alone, Pravastatin Alone, and Simvastatin  
39  
40  
41 434 Alone (from the United States Food and Drug Administration Adverse Event Reporting  
42  
43  
44 435 System). The American journal of cardiology 2007;99(3):379-81.  
45  
46  
47 436 31. Calza L. Long-term use of rosuvastatin: a critical risk benefit appraisal and  
48  
49  
50 437 comparison with other antihyperlipidemics. Drug, Healthcare and Patient Safety  
51  
52  
53 438 2009;1:25-33.  
54  
55  
56 439 32. Perrio MJ, Wilton LV, Shakir SAW. The Safety Profiles of Orlistat and Sibutramine:  
57  
58  
59  
60

- 1  
2  
3  
4  
5  
6 440 Results of Prescription-Event Monitoring Studies in England. *Obesity* 2007;15(11):2712-22.  
7  
8  
9 441 33. EMEA. European Medicines Agency recommends withdrawal of benfluorex from  
10  
11  
12 442 the market in European Union. London: European Medicines Agency; 2009 [updated 18  
13  
14  
15 443 December 2009; cited 9 June 2011]; Available from:  
16  
17  
18 444 [http://www.ema.europa.eu/ema/index.jsp?curl=pages/news\\_and\\_events/news/2010/01/news\\_](http://www.ema.europa.eu/ema/index.jsp?curl=pages/news_and_events/news/2010/01/news_)  
19  
20  
21 445 [detail\\_000977.jsp&murl=menus/news\\_and\\_events/news\\_and\\_events.jsp&mid=WC0b01ac05](http://www.ema.europa.eu/ema/index.jsp?curl=pages/news_and_events/news/2010/01/news_)  
22  
23  
24 446 [8004d5c1&jenabled=true.](http://www.ema.europa.eu/ema/index.jsp?curl=pages/news_and_events/news/2010/01/news_)  
25  
26  
27 447 34. Khan M, Okumura J, Sovannarith T, et al. Counterfeit Medicines in  
28  
29  
30 448 Cambodia—Possible Causes. *Pharm Res* 2011;28(3):484-9.  
31  
32  
33 449 35. FDA Warns Consumers about Counterfeit Alli [database on the Internet]. U.S.  
34  
35  
36 450 Food and Drug Administration. 2010 [cited 3 October 2011]. Available from:  
37  
38  
39 451 <http://www.fda.gov/NewsEvents/Newsroom/PressAnnouncements/ucm197857.htm>.  
40  
41  
42 452 36. UPDATED Public Health Alert: Counterfeit Alli containing sibutramine [database  
43  
44  
45 453 on the Internet]. U.S. Food and Drug Administration. 2010 [cited 3 October 2011]. Available  
46  
47  
48 454 from:  
49  
50  
51 455 <http://www.fda.gov/Drugs/DrugSafety/PostmarketDrugSafetyInformationforPatientsandPro>  
52  
53  
54 456 [viders/ucm198519.htm](http://www.fda.gov/Drugs/DrugSafety/PostmarketDrugSafetyInformationforPatientsandPro).  
55  
56  
57 457 37. Newton PN, Fernández FM, Plançon A, et al. A Collaborative Epidemiological  
58  
59  
60

- 1  
2  
3  
4  
5  
6 458 Investigation into the Criminal Fake Artesunate Trade in South East Asia. PLoS Med  
7  
8  
9 459 2008;5(2):e32.  
10  
11  
12 460 38. Dondorp AM, Newton PN, Mayxay M, et al. Fake antimalarials in Southeast Asia  
13  
14 461 are a major impediment to malaria control: multinational cross-sectional survey on the  
15  
16 462 prevalence of fake antimalarials. Trop Med Int Health 2004;9(12):1241-6.  
17  
18  
19  
20 463 39. Khan MH, Okumura J, Sovannarith T, et al. Prevalence of counterfeit  
21  
22 464 anti-helminthic medicines: a cross-sectional survey in Cambodia. Trop Med Int Health 2010  
23  
24 465 May 15(5):639-44. DOI: 10.1111/j.1365-3156.2010.02494.x  
25  
26  
27  
28  
29 466 40. Lineberry TW, Bostwick JM. Taking the Physician Out of "Physician Shopping": A  
30  
31 467 Case Series of Clinical Problems Associated With Internet Purchases of Medication. Mayo  
32  
33 468 Clin Proc 2004;79(8):1031-4.  
34  
35  
36  
37  
38 469  
39  
40  
41 470  
42  
43  
44 471  
45  
46  
47 472  
48  
49  
50 473  
51  
52  
53 474  
54  
55  
56  
57  
58  
59  
60

1  
2  
3  
4  
5  
6  
7  
8  
9  
10  
11  
12  
13  
14  
15  
16  
17  
18  
19  
20  
21  
22  
23  
24  
25  
26  
27  
28  
29  
30  
31  
32  
33  
34  
35  
36  
37  
38  
39  
40  
41  
42  
43  
44  
45  
46  
47  
48  
49  
50  
51  
52  
53  
54  
55  
56  
57  
58  
59  
60

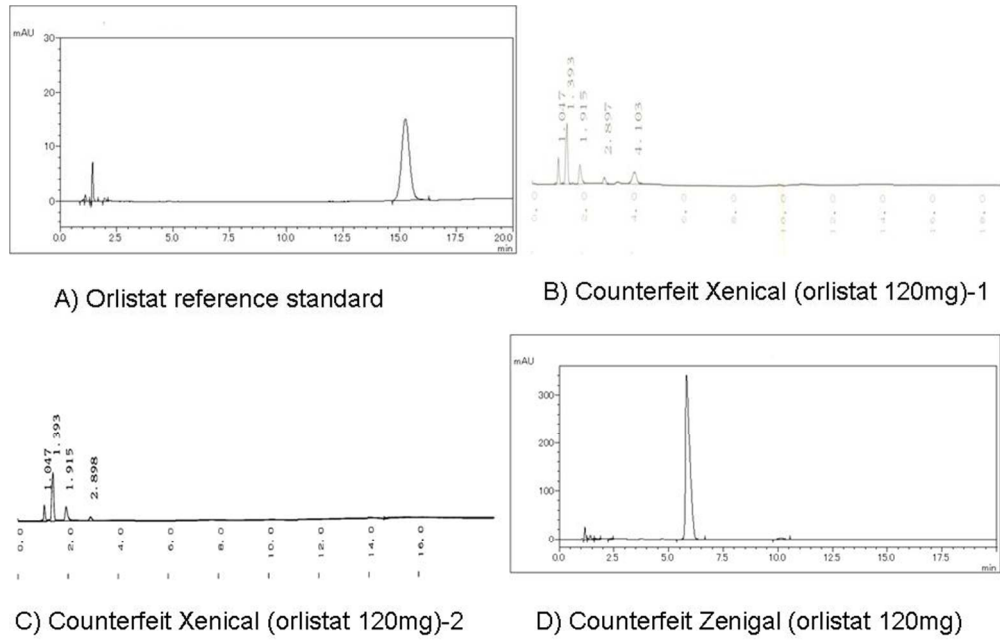

Figure 1: Chromatograms of the reference standard of orlistat and counterfeit samples  
254x190mm (96 x 96 DPI)

ew only

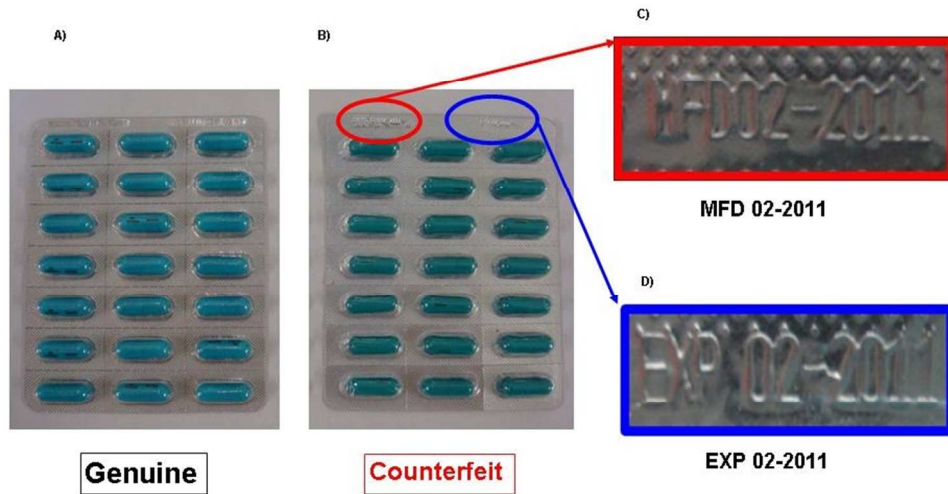

Figure 2. Front of blister: A) Genuine sample, B) Counterfeit sample, C) Manufacturing date of counterfeit sample (MFD 02-2011), D) Expiration date of counterfeit sample (EXP 02-2011)  
254x190mm (96 x 96 DPI)

1  
2  
3  
4  
5  
6  
7  
8  
9  
10  
11  
12  
13  
14  
15  
16  
17  
18  
19  
20  
21  
22  
23  
24  
25  
26  
27  
28  
29  
30  
31  
32  
33  
34  
35  
36  
37  
38  
39  
40  
41  
42  
43  
44  
45  
46  
47  
48  
49  
50  
51  
52  
53  
54  
55  
56  
57  
58  
59  
60

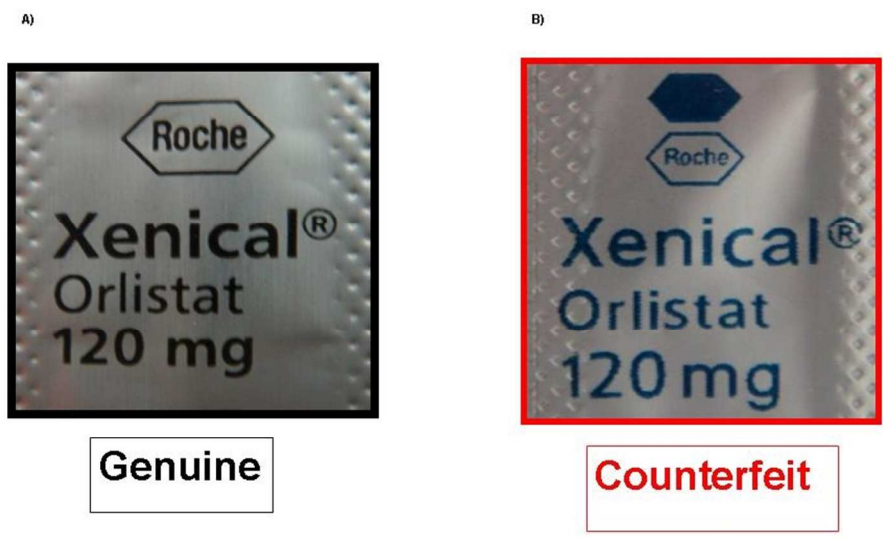

Figure 3. Reverse side of blister: A) Logo of genuine sample, B) Logo of counterfeit sample  
254x190mm (96 x 96 DPI)

Review only



STROBE 2007 (v4) Statement—Checklist of items that should be included in reports of *cross-sectional studies*

| Section/Topic                | Item # | Recommendation                                                                                                                                                                       | Reported on page # |
|------------------------------|--------|--------------------------------------------------------------------------------------------------------------------------------------------------------------------------------------|--------------------|
| Title and abstract           | 1      | (a) Indicate the study's design with a commonly used term in the title or the abstract                                                                                               | 1                  |
|                              |        | (b) Provide in the abstract an informative and balanced summary of what was done and what was found                                                                                  | 2-3                |
| <b>Introduction</b>          |        |                                                                                                                                                                                      |                    |
| Background/rationale         | 2      | Explain the scientific background and rationale for the investigation being reported                                                                                                 | 5-6                |
| Objectives                   | 3      | State specific objectives, including any prespecified hypotheses                                                                                                                     | 6                  |
| <b>Methods</b>               |        |                                                                                                                                                                                      |                    |
| Study design                 | 4      | Present key elements of study design early in the paper                                                                                                                              | 7                  |
| Setting                      | 5      | Describe the setting, locations, and relevant dates, including periods of recruitment, exposure, follow-up, and data collection                                                      | 7                  |
| Participants                 | 6      | (a) Give the eligibility criteria, and the sources and methods of selection of participants                                                                                          | 7-8                |
| Variables                    | 7      | Clearly define all outcomes, exposures, predictors, potential confounders, and effect modifiers. Give diagnostic criteria, if applicable                                             | 8-9                |
| Data sources/<br>measurement | 8*     | For each variable of interest, give sources of data and details of methods of assessment (measurement). Describe comparability of assessment methods if there is more than one group | 8                  |
| Bias                         | 9      | Describe any efforts to address potential sources of bias                                                                                                                            | N.A.               |
| Study size                   | 10     | Explain how the study size was arrived at                                                                                                                                            | 7                  |
| Quantitative variables       | 11     | Explain how quantitative variables were handled in the analyses. If applicable, describe which groupings were chosen and why                                                         | 8-10               |
| Statistical methods          | 12     | (a) Describe all statistical methods, including those used to control for confounding                                                                                                | 11                 |
|                              |        | (b) Describe any methods used to examine subgroups and interactions                                                                                                                  | N.A.               |
|                              |        | (c) Explain how missing data were addressed                                                                                                                                          | N.A.               |
|                              |        | (d) If applicable, describe analytical methods taking account of sampling strategy                                                                                                   | N.A.               |
|                              |        | (e) Describe any sensitivity analyses                                                                                                                                                | N.A.               |
| <b>Results</b>               |        |                                                                                                                                                                                      |                    |

|                          |     |                                                                                                                                                                                                              |       |
|--------------------------|-----|--------------------------------------------------------------------------------------------------------------------------------------------------------------------------------------------------------------|-------|
| Participants             | 13* | (a) Report numbers of individuals at each stage of study—eg numbers potentially eligible, examined for eligibility, confirmed eligible, included in the study, completing follow-up, and analysed            | 11-13 |
|                          |     | (b) Give reasons for non-participation at each stage                                                                                                                                                         | 11-13 |
|                          |     | (c) Consider use of a flow diagram                                                                                                                                                                           |       |
| Descriptive data         | 14* | (a) Give characteristics of study participants (eg demographic, clinical, social) and information on exposures and potential confounders                                                                     | 13-14 |
|                          |     | (b) Indicate number of participants with missing data for each variable of interest                                                                                                                          | 13-14 |
| Outcome data             | 15* | Report numbers of outcome events or summary measures                                                                                                                                                         | 14-16 |
| Main results             | 16  | (a) Give unadjusted estimates and, if applicable, confounder-adjusted estimates and their precision (eg, 95% confidence interval). Make clear which confounders were adjusted for and why they were included | N.A.  |
|                          |     | (b) Report category boundaries when continuous variables were categorized                                                                                                                                    | N.A.  |
|                          |     | (c) If relevant, consider translating estimates of relative risk into absolute risk for a meaningful time period                                                                                             | N.A.  |
| Other analyses           | 17  | Report other analyses done—eg analyses of subgroups and interactions, and sensitivity analyses                                                                                                               | 14-16 |
| <b>Discussion</b>        |     |                                                                                                                                                                                                              |       |
| Key results              | 18  | Summarise key results with reference to study objectives                                                                                                                                                     | 17-19 |
| Limitations              | 19  | Discuss limitations of the study, taking into account sources of potential bias or imprecision. Discuss both direction and magnitude of any potential bias                                                   | 19    |
| Interpretation           | 20  | Give a cautious overall interpretation of results considering objectives, limitations, multiplicity of analyses, results from similar studies, and other relevant evidence                                   | 17-19 |
| Generalisability         | 21  | Discuss the generalisability (external validity) of the study results                                                                                                                                        | 19    |
| <b>Other information</b> |     |                                                                                                                                                                                                              |       |
| Funding                  | 22  | Give the source of funding and the role of the funders for the present study and, if applicable, for the original study on which the present article is based                                                | 20    |

\*Give information separately for cases and controls in case-control studies and, if applicable, for exposed and unexposed groups in cohort and cross-sectional studies.

**Note:** An Explanation and Elaboration article discusses each checklist item and gives methodological background and published examples of transparent reporting. The STROBE checklist is best used in conjunction with this article (freely available on the Web sites of PLoS Medicine at <http://www.plosmedicine.org/>, Annals of Internal Medicine at <http://www.annals.org/>, and Epidemiology at <http://www.epidem.com/>). Information on the STROBE Initiative is available at [www.strobe-statement.org](http://www.strobe-statement.org).



**Public health concerns for anti-obesity medicines imported for personal use through the Internet: a cross-sectional study**

|                                 |                                                                                                                                                                                                                                                                                                                                                                                                                             |
|---------------------------------|-----------------------------------------------------------------------------------------------------------------------------------------------------------------------------------------------------------------------------------------------------------------------------------------------------------------------------------------------------------------------------------------------------------------------------|
| Journal:                        | <i>BMJ Open</i>                                                                                                                                                                                                                                                                                                                                                                                                             |
| Manuscript ID:                  | bmjopen-2012-000854.R1                                                                                                                                                                                                                                                                                                                                                                                                      |
| Article Type:                   | Research                                                                                                                                                                                                                                                                                                                                                                                                                    |
| Date Submitted by the Author:   | 09-Mar-2012                                                                                                                                                                                                                                                                                                                                                                                                                 |
| Complete List of Authors:       | Khan, Mohiuddin; Kanazawa University, Drug Management and Policy<br>Tanimoto, Tsuyoshi; Doshisha Women's College,<br>Nakanishi, Yoko; Public Health Center, ; Kanazawa University, Drug<br>Management and Policy<br>Yoshida, Naoko; Kanazawa University, Drug Management and Policy<br>Tsuboi, Hirohito; Kanazawa University, Drug Management and Policy<br>Kimura, Kazuko; Kanazawa University, Drug Management and Policy |
| <b>Primary Subject Heading</b>: | Public health                                                                                                                                                                                                                                                                                                                                                                                                               |
| Secondary Subject Heading:      | Global health, Pharmacology and therapeutics, Nutrition and metabolism                                                                                                                                                                                                                                                                                                                                                      |
| Keywords:                       | PUBLIC HEALTH, NUTRITION & DIETETICS, MEDICAL LAW, Quality in health care < HEALTH SERVICES ADMINISTRATION & MANAGEMENT, Health & safety < HEALTH SERVICES ADMINISTRATION & MANAGEMENT                                                                                                                                                                                                                                      |
|                                 |                                                                                                                                                                                                                                                                                                                                                                                                                             |

SCHOLARONE™  
Manuscripts

Only

1  
2  
3  
4  
5  
6  
7  
8  
9 1 Public health concerns for anti-obesity medicines imported for  
10  
11 2 personal use through the Internet: a cross-sectional study  
12  
13  
14 3 survey

15  
16  
17 4 Mohiuddin Hussain Khan,<sup>1,\*</sup> Tsuyoshi Tanimoto,<sup>2</sup> Yoko Nakanishi,<sup>1,3</sup> Naoko Yoshida,<sup>1</sup> Hirohito

18  
19 5 Tsuboi,<sup>1</sup> Kazuko Kimura,<sup>1</sup>

20  
21  
22 6 <sup>1</sup> Drug Management and Policy, Kanazawa University, Kanazawa City, Ishikawa, Japan

23  
24 7 <sup>2</sup> Doshisha Women's College, Kyoto, Japan

25  
26  
27 8 <sup>3</sup> Public Health Center, Sainen 3-4-25, Kanazawa city, Ishikawa, Japan

28  
29 9 \* **Corresponding author:** Drug Management and Policy, Kanazawa University, Kakuma-machi,

30  
31  
32 10 Kanazawa City, Ishikawa, Japan 920-1192, Tel./Fax: +81 76 264 6286, E-mail:

33  
34  
35 11 mohiuddin\_khn@yahoo.com

36  
37 12 **Running title:** Quality of online anti-obesity medicines

38  
39  
40 13 **Word counts:** 3,996088

41  
42 14 **Key Words:** Quality, counterfeit medicine, public health, the Internet, anti-obesity

43  
44  
45 15 medicine

46  
47  
48 16

1  
2  
3  
4  
5  
6  
7  
8  
9 17 **ABSTRACT**

10  
11 **Objectives:** To explore the circulation of anti-obesity medicines via the Internet and their  
12  
13  
14 quality.

15  
16  
17 **Design:** Cross-sectional study survey.

18  
19  
20  
21 **Setting:** Internet pharmacies and pharmaceutical suppliers accessible from Japan.

22  
23 **Participants:** Anti-obesity medicines were purchased using relevant keywords on Japanese  
24  
25 Google search engine. Blogs and advertisement-only sites were excluded.

26  
27 **Primary and secondary outcome measures:** The authenticity of the samples was investigated  
28  
29 in collaboration with the manufacturers of the samples and medicine regulatory authorities. of  
30  
31 Quality of the samples were performed by pharmacopoeial analyses utilizing high performance  
32  
33 liquid chromatography.

34  
35  
36  
37 **Results:** Eighty-two samples were purchased from 36 internet sites. Approximately half of the  
38  
39 sites did not mention a physical address, and 45% of the samples did not contain a package  
40  
41 insert. A variety of custom declarations were made for the shipments of the samples: personal  
42  
43 health items, supplement, medicines, general merchandise, tea and others. Among 82 samples,  
44  
45  
46  
47 52 samples were analyzed to check their pharmacopoeial quality. Authenticity responses were  
48  
49  
50 received from only five out of 20 manufacturing companies. According to pharmacopoeial  
51  
52 analyses and authenticity investigation, three of the samples were identified as counterfeits and  
53  
54

1  
2  
3  
4  
5  
6  
7  
8  
9 35 did not contain any active ingredients. ~~According to the chemical analyses,~~ Two of these  
10  
11 36 samples were confirmed as counterfeits by the manufacturer of the authentic products. The  
12  
13  
14 37 manufacturer of the other sample did not respond to our request for an authenticity check even  
15  
16  
17 38 after several communication attempts. These counterfeit cases have been reported at the rapid  
18  
19 39 alert system of Western Pacific Region of the World Health Organization.

20  
21  
22 40 **Conclusion:** Many counterfeit and unapproved anti-obesity medicines may be easily bypassing  
23  
24 41 regulatory checks during shipping and are widely circulated through the Internet. Regulatory  
25  
26  
27 42 authorities should take measures to prevent these medicines from entering countries to  
28  
29 43 safeguard their citizens.  
30  
31  
32 44  
33  
34 45  
35  
36  
37 46  
38  
39 47  
40  
41  
42 48  
43  
44 49  
45  
46  
47 50  
48  
49 51  
50  
51  
52  
53  
54  
55  
56  
57  
58  
59  
60

1  
2  
3  
4  
5  
6  
7  
8  
9 52 **ARTICLE SUMMARY**

10  
11 53 **Article Focus**

- 12  
13  
14 • Quality of online anti-obesity medicines.  
15  
16  
17 55 • Circulation of unapproved anti-obesity medicines via the Internet.  
18

19 56 **Key Messages**

- 20  
21  
22 57 • Counterfeit and substandard anti-obesity medicines, orlistat are identified.  
23  
24 58 • False and vague custom declarations were made by some of the shipping  
25  
26  
27 59 companies to by-pass regulatory checks of unapproved online medicines.  
28

29 60 **Strengths and Limitations**

30  
31  
32 61 Small sample size and low authenticity response rate are limitations of this study.  
33  
34 62 However, the study provides valuable information for regulatory authorities on how  
35  
36  
37 63 unapproved and counterfeit medicines are being circulated through the Internet.  
38  
39  
40 64 Concerted efforts of authentic manufacturers and medicine regulatory authorities are [a](#)  
41  
42  
43 65 must to combat counterfeits and ensure access of quality medicines to online consumers.  
44  
45  
46  
47  
48  
49  
50  
51  
52  
53  
54  
55  
56  
57  
58  
59  
60

1  
2  
3  
4  
5  
6  
7  
8  
9  
10  
11  
12  
13  
14  
15  
16  
17  
18  
19  
20  
21  
22  
23  
24  
25  
26  
27  
28  
29  
30  
31  
32  
33  
34  
35  
36  
37  
38  
39  
40  
41  
42  
43  
44  
45  
46  
47  
48  
49  
50  
51  
52  
53  
54  
55  
56  
57  
58  
59  
60

66 **INTRODUCTION**

67 Over the past decade, the Internet has become an integral part of life for a variety of uses. [A](#)  
68 [growing proportion](#) ~~Approximately 60%~~ of Internet users in some developed countries, [such as](#)  
69 [Japan and United States of America \(USA\)](#), utilize the Internet for their health related  
70 activities. [\[1-4\]\[1, 2\]](#) In fact, when Internet users were asked about specific searches related to  
71 health, such as diet and fitness information or health insurance materials, 80% of the users  
72 [among adult Americans](#) in a 2002 survey said that they had performed these types of  
73 searches. [\[1\]](#) According to a survey taken in Japan, a majority (86.3%) of the medicines imported  
74 for personal use were purchased through the Internet. [\[5\]\[3\]](#) However, according to World Health  
75 Organization (WHO), more than 50% of the medicines from Internet sites, which often conceal  
76 their physical address, may be counterfeit or of substandard quality. [\[6\]\[4\]](#)  
77 [WHO defines counterfeit medicines as ones which are deliberately and fraudulently mislabeled](#)  
78 [with respect to identity and/or source.\[7-9\] On the other hand, substandard medicines are](#)  
79 [legitimate ones that do not meet the quality specifications claimed by their manufacturers.\[10\]](#)  
80  
81 [A number of reports documented the severity of drug counterfeiting during the last two decades.](#)  
82 [WHO found that 20-90% of drugs were counterfeited in some African countries.\[11, 12\] In](#)  
83 [Tanzania, 12.2% of antimalarials were identified as substandard in 2005.\[13\] In 2009, 37% of](#)

Field Code Changed



1  
2  
3  
4  
5  
6  
7  
8  
9 84 the samples did not meet standards in Nigeria.[14] Similar evidences were also reported in  
10  
11 85 Asia,[15-17] The unprecedented growth of the Internet accompanied with globalization of  
12  
13  
14 86 commerce might have worsened the situation further.[18-20]

Field Code Changed

Field Code Changed

15  
16  
17 87  
18  
19 88 Obesity is becoming a major public health epidemic in this century and is associated with an  
20  
21  
22 89 increased risk for a number of health problems, such as hypertension, dyslipidemia, type 2  
23  
24 90 diabetes, and cardiovascular diseases.[21][5] The prevalence of obesity and its associated  
25  
26  
27 91 conditions are increasingly affecting both developed and developing countries over the last few  
28  
29 92 decades.[22][6] Studies suggest that primarily adolescent and adult males are overweight or  
30  
31  
32 93 obese in Japan.[23][7] Recommended strategies for managing weight and obesity include  
33  
34  
35 94 lifestyle changes with appropriate dietary management and exercise. However, individuals with  
36  
37 95 an isolated BMI $\geq 30$  kg m<sup>-2</sup> or a BMI $> 27$  kg m<sup>-2</sup> with co-morbidities such as type 2 diabetes,  
38  
39  
40 96 cardiovascular diseases, and obstructive sleep apnea, should receive pharmacotherapy as  
41  
42 97 well.[24][8] Among the available anti-obesity medicines, phentermine, diethylpropion and  
43  
44  
45 98 orlistat are approved by the U.S. Food and Drug Administration, but sibutramine has been  
46  
47 99 withdrawn from the market.[25, 26][9, 10] Of these anti-obesity medicines, only mazindol has  
48  
49  
50 100 been approved for use in Japan.[27][11] However, several of these anti-obesity medicines are  
51  
52  
53 101 among those that are frequently imported into Japan for personal use.[28][12] Safety profile.

Field Code Changed

1  
2  
3  
4  
5  
6  
7  
8  
9 102 risk vs benefit, cost-effectiveness of the investment deters manufacturers and marketers to get  
10  
11 103 interested in approving anti-obesity medicines for Japanese market.[29]  
12  
13  
14 104

15  
16  
17 105 The online purchase of medicine through the Internet is a growing and convenient practice for  
18  
19 106 many consumers. This practice has also become one of the most popular, easiest and safest

20  
21  
22 107 routes for counterfeit medicine traders.[6, 30-32][4, 13-15] The availability of counterfeit

23  
24 108 erectile dysfunction (ED) medicines had been reported in Japan by a limited number of case

25  
26 109 investigations.[33, 34] In addition, a joint investigation done by four pharmaceutical industries

27  
28  
29 110 in Japan reported that approximately 60% of ED medicines available in the Internet are

30  
31 111 counterfeited.[34] However, the quality of anti-obesity and diet medicines available through the

32  
33 112 Internet in Japan was still unknown. Since, all types of therapeutic classes of medicines are

34  
35 113 counterfeited from essential medicines to lifestyle drugs, Because lifestyle medicines are

36  
37 114 frequently targeted by counterfeiters, a collaborative investigation between ~~the Ministry of~~

38  
39 115 ~~Health and Labour Welfare (MHLW), Japan;~~ Kanazawa University, Kanazawa; and Doshisha

40  
41  
42 116 Women's College, Kyoto, Japan was conducted to survey the quality of anti-obesity medicines

43  
44  
45 117 that were purchased through online medicine sites. This investigation also provided an

46  
47  
48 118 understanding of the process by which unapproved medicines are being imported for and used

49  
50  
51 119 by consumers in Japan.  
52  
53  
54  
55  
56  
57  
58  
59  
60

Field Code Changed

1  
2  
3  
4  
5  
6  
7  
8  
9 12010  
11 12112  
13  
14 122 **METHODS**15  
16  
17 123 **Study design**18  
19 124 Quality of online anti-obesity medicines was assessed using an online cross-sectional  
20  
21  
22 125 ~~study survey~~ during August 2009.  
23

24 126

25  
26  
27 127 **Selection of Internet sites and sample collection**28  
29 128 ~~Internet sites were selected in five steps to purchase anti-obesity medicines. In the first step,~~30  
31  
32 129 ~~The Japanese keywords personal import agent (個人輸入代行), diet (ダイエット), and~~33  
34 130 ~~anti-obesity (肥満) medicines were used on the Japanese Google search engine~~35  
36  
37 131 ~~(www.google.co.jp). From a list of more than 140,000 results, first 500 were further screened~~38  
39  
40 132 ~~out to find online pharmacies or suppliers or brokers—that offer anti-obesity medicines~~41  
42 133 ~~provided that they did not mention their physical address in their websites. That means sites~~43  
44 134 ~~with physical address and/or blogs and advertise-only sites were excluded in this step. In the~~45  
46  
47 135 ~~second through fourth steps. Searches were also made on websites that advertise and sell~~48  
49  
50 136 ~~counterfeit Cialis (シアリス), Levitra (レビトラ) and Viagra (バイアグラ). The physical~~51  
52  
53 137 ~~characteristics of original and counterfeit Cialis and Levitra were both identified earlier by the~~  
54  
55  
56  
57  
58  
59  
60

1  
2  
3  
4  
5  
6  
7  
8  
9 138 ~~Ministry of Health, Japan, and information on websites that sell counterfeit Viagra was provided~~  
10  
11 139 ~~by Pfizer.[16] As such, in the second step, the Japanese key words personal import agent (‘個人~~  
12  
13  
14 140 ~~輸入代行’), Cialis (‘シアリス’), ‘50mg’ and ‘100mg’ were used and first 100~~  
15  
16  
17 141 ~~results were further screened out from a list of more than 35,000 results to find out~~  
18  
19 142 ~~availability of anti-obesity medicines offered along side ED medicines. In the third step, key~~  
20  
21  
22 143 ~~words personal import agent (‘個人輸入代行’), Levitra (‘レビトラ’), ‘50mg’ and~~  
23  
24 144 ~~‘100mg’ were used and again first 100 results were screened out from a list of around~~  
25  
26  
27 145 ~~60,000 results. The physical characteristics (e.g.: color of genuine and counterfeits, strength,~~  
28  
29  
30 146 ~~packaging etc.) of original and counterfeit Cialis and Levitra were both identified earlier by the~~  
31  
32 147 ~~Ministry of Health, Japan.[33] In the fourth step, samples were purchased from nine internet~~  
33  
34 148 ~~sites where counterfeit Viagra (バイアグラ) was offered in the past and information on these~~  
35  
36  
37 149 ~~sites was provided by Pfizer. Finally, based on the information available from our previous~~  
38  
39  
40 150 ~~research, we searched homepages of ten domestic brokers and four of them were selected~~  
41  
42 151 ~~for sampling.~~

43  
44  
45 152  
46  
47 153 After the exclusion of blogs and advertisement-only sites, 36 sites were chosen in total for the  
48  
49  
50 154 purchase of anti-obesity medicines. ~~Some of the criteria used in choosing the sites included the~~  
51  
52  
53 155 ~~absence of a physical address and the presence of suspicious advertisements.~~ A list of

1  
2  
3  
4  
5  
6  
7  
8  
9 156 overweight/anti-obesity medicines was sought on each of the selected sites. ~~Priority rankings~~  
10  
11 157 ~~were made of the list of Available medicines in the lists were numbered consecutively~~ according  
12  
13  
14 158 to their vertical or horizontal placement on the web pages, ~~excluding foods and drinks items.~~  
15  
16  
17 159 Samples of the anti-obesity medicines were purchased from selected sites according to the  
18  
19 160 smallest ~~priority~~ number found for a medicine that had not been purchased from a previous  
20  
21  
22 161 website.

23  
24 162  
25  
26  
27 163 Information on the site's name, URL, compliance with Japanese rules of "Act on Specified  
28  
29 164 Commercial Transaction" (ASCT), e-mail address, the name of the product and other  
30  
31  
32 165 information such as the dosage, efficacy and side effects, recommendation on consultation with  
33  
34 166 doctors or pharmacists or opportunities for consultation were recorded while examining the sites  
35  
36  
37 167 from which at least one product was purchased. ~~ASCT is the policy guidelines of all kinds of~~  
38  
39 168 ~~business transaction in Japan to protect the interests of consumers. These guidelines cover~~  
40  
41  
42 169 ~~door-to-door sales, mail order sales, telemarketing etc. According to the ASCT all e-commerce~~  
43  
44  
45 170 ~~sites in Japan should mention their name, address(es), telephone numbers of the~~  
46  
47 171 ~~suppliers/brokers, prices of offered for commodities, shipment procedure(s) etc. in their~~  
48  
49  
50 172 ~~advertisements.[35]~~

51  
52  
53 173  
54  
55  
56  
57  
58  
59  
60

1  
2  
3  
4  
5  
6  
7  
8  
9 174 **Observational analysis**

10  
11 175 All of the samples were given distinct codes when the shipments were received. The name of  
12  
13  
14 176 the product, dosage form, content information from the printed label, the manufacturers' name  
15  
16  
17 177 and address, the country of origin, the manufacture and expiration dates, lot, registration and  
18  
19 178 license numbers, presence of package insert and their languages, Japanese ~~manual~~,  
20  
21  
22 179 information/notes, information from the shipping company, the sending country, the date of  
23  
24 180 shipment and arrival, and customs declaration notations were recorded for each of the samples.  
25  
26

27 181

28  
29 182 **Chemical analysis**

30  
31  
32 183 Pharmacopoeial procedures for the analysis of the samples (i.e.: orlistat, sibutramine,  
33  
34 184 rimonabant, benfluorex and lovastatin) were established and performed using high performance  
35  
36  
37 185 liquid chromatography (HPLC), which are described briefly below. However, analytical  
38  
39  
40 186 methods and results of rhei rhubarb and herbal products (i.e.: pahyma hoelen, ophiopogonis  
41  
42 187 tuber and dai dai hua) were excluded, since they will be reported elsewhere.  
43  
44

45 188

46  
47 189 Preparation of the sample solutions

48  
49  
50 190 Randomly selected capsules of orlistat and sibutramine samples were weighed accurately. After  
51  
52  
53 191 each capsule was weighed, the contents were removed, and the empty capsule shells were  
54  
55

1  
2  
3  
4  
5  
6  
7  
8  
9 192 subsequently weighed. The difference between the weight of the whole capsule and the capsule  
10  
11 193 shell was assumed to be the weight of the contents. To prepare sample solutions of lovastatin,  
12  
13 194 benfluorex and rimonabant tablets, randomly chosen tablets were weighed accurately and  
14  
15 195 subsequently crushed separately into powder. Approximately 80 ml of methanol was added to  
16  
17 196 the capsule's contents or tablet powder, and the mixture was sonicated for 30 min. After  
18  
19 197 sonication, methanol was then added to a volume of 100 ml. The resulting solutions were  
20  
21 198 filtered through a membrane filter (pore size: 0.45  $\mu\text{m}$ ) and used as the sample solutions.  
22  
23  
24  
25  
26

27 199  
28  
29 200 ~~To prepare sample solutions of lovastatin, benfluorex and rimonabant tablets, randomly chosen~~  
30  
31 201 ~~tablets were weighed accurately and subsequently crushed separately into powder.~~  
32  
33 202 ~~Approximately 80 ml of methanol was added to the powder, and the solutions were sonicated~~  
34  
35 203 ~~for 30 min. Methanol was added to each of the solutions to a volume of 100 ml. The resulting~~  
36  
37 204 ~~solutions were filtered through membrane filters (pore size: 0.45  $\mu\text{m}$ ) and used as the sample~~  
38  
39 205 ~~solutions.~~  
40  
41  
42  
43  
44  
45  
46

47 207 Preparation of standard solutions

48  
49 208 Three consecutive strengths of standard solutions were prepared by dissolving 0.375 mg, 0.75  
50  
51 209 mg and 1.50 mg of orlistat; 0.050 mg, 0.100 mg and 0.200 mg of sibutramine; 0.100 mg, 0.200  
52  
53  
54  
55  
56  
57  
58  
59  
60

1  
2  
3  
4  
5  
6  
7  
8  
9 210 mg and 0.500 mg of lovastatin; 0.100 mg, 1.50 mg and 2.00 mg of benfluorex; 0.100 mg, 0.200  
10  
11 mg and 0.500 mg of rimonabant in 1 ml of methanol for each solution.

12  
13  
14 212

15  
16  
17 213 Assay condition

18  
19 214 Ten microliters of each sample solution and standard solution was placed in vials and assayed

20  
21 215 using a photodiode array of 225 nm wavelength (200–400 nm range for spectra) with a stainless

22  
23  
24 216 steel column with a 4.6 mm internal diameter and 15 cm length packed with octadecylsilanized

25  
26  
27 217 silica gel for liquid chromatography (5 µm particle diameter) used with Mightysil RP-18 GP

28  
29 218 150-4.6. The column temperature was maintained at 45°C. A mixture of methanol and phosphate

30  
31  
32 219 buffer, pH 7.0 (17:3) was used as the mobile phase at a flow rate of 1.2 ml/min.

33  
34  
35 220

36  
37 221 **Authenticity investigation**

38  
39 222 A catalogue and a questionnaire for all the samples were created that included the information

40  
41  
42 223 from the printed labels of the product packages. The printed information was also checked

43  
44 224 against the information on the manufacturers' websites. The questionnaires were sent to the

45  
46  
47 225 appropriate manufacturers with a portion of the samples for verification of their authenticity.

48  
49  
50 226 The regulatory authorities for medicine in the country of origin were also contacted to verify the

51  
52  
53 227 legitimacy of the products and their approval for marketing. After considering the WHO



228 definition of counterfeit medicines, the gathered information was analyzed to determine the  
 229 authenticity of the individual samples and their manufacturers.<sup>[7, 36][17, 18]</sup>

Field Code Changed

231 **Statistical analysis**

232 Because of the small size of the sample, descriptive statistical analysis was performed using  
 233 Microsoft Excel.

235 **RESULTS**

236 A total of 82 samples from 31 varieties of anti-obesity products were purchased from 36 internet  
 237 sites (Table 1). On average, these sites offered 62 kinds of products (including diet foods and  
 238 drinks). Some of these products were shipped in divided shipments and treated as distinct  
 239 samples. Of the selected internet sites, 15 sites did not show a physical address, and six, two and  
 240 nine of the web sites advertised counterfeit Cialis, Levitra and Viagra, respectively. Two of the  
 241 sites with fake Cialis and Viagra also did not show a physical address. Four of the websites were  
 242 hosted by domestic shipping companies.

244 Table 1. Active Ingredient

| <u>Active Ingredient</u>         | <u>Approval status in Japan</u> | <u>n(%)</u>      | <u>Classification</u>        |
|----------------------------------|---------------------------------|------------------|------------------------------|
| <u>Sibutramine hydrochloride</u> | <u>Not approved</u>             | <u>42 (51.2)</u> | <u>Prescription medicine</u> |

Formatted Table

Formatted: Not Highlight

|                                 |                     |                   |                                                                 |
|---------------------------------|---------------------|-------------------|-----------------------------------------------------------------|
| <u>Orlistat</u>                 | <u>Not approved</u> | <u>15 (18.3)</u>  | <u>Prescription medicine: 10</u><br><u>Over the counter: 5*</u> |
| <u>Rimonabant</u>               | <u>Not approved</u> | <u>2 (2.4)</u>    | <u>Prescription medicine</u>                                    |
| <u>Benfluorex</u>               | <u>Not approved</u> | <u>2 (2.4)</u>    | <u>Prescription medicine</u>                                    |
| <u>Lovastatin**</u>             | <u>Not approved</u> | <u>2 (2.4)</u>    | <u>Prescription medicine</u>                                    |
| <u>Pachyma hoelen (茯苓)</u>      | <u>Approved</u>     | <u>14 (17.1)</u>  | <u>Over the counter</u>                                         |
| <u>Ophiopogonis tuber (麦門冬)</u> | <u>Approved</u>     | <u>3 (3.6)</u>    | <u>Over the counter</u>                                         |
| <u>Rhei Rhubarb (大黄)**</u>      | <u>Approved</u>     | <u>1 (1.2)</u>    | <u>Over the counter</u>                                         |
| <u>Dai dai hua (代代花)</u>        | <u>Approved</u>     | <u>1 (1.2)</u>    | <u>Over the counter</u>                                         |
| <u>Total</u>                    |                     | <u>82 (100.0)</u> |                                                                 |

Formatted: Not Highlight

245 \*: Alli (orlistat 60 mg), \*\*: Not classified as anti-obesity medicines, available under diet (ダイ  
 246 エット) search

247

#### 248 Information available on the web sites

249 Different levels of compliance with ASCT were observed throughout all (36) of the web  
 250 sites.<sup>[35]</sup> For instance, all (100%) of them mentioned the selling price, shipping charges for the  
 251 goods, and methods of payment. However, only 21 (58.3%) of them provided telephone  
 252 numbers, and only 17 (47.2%) of them mentioned a physical address.

253

254 Information for e-mail addresses and shipment procedures were presented on all of the selected  
 255 sites. However, only 21 (58.3%) of them encouraged consumers to consult with a physician or  
 256 pharmacist. Consultation services were available at two (5.5%) of the sites. Dosage and  
 257 administration, effects and efficacy, and side effects related to the products were explained in 18  
 258 (50%), 23 (63.8%) and 17 (47.2%) of the sites, respectively, despite the prohibition on

1  
2  
3  
4  
5  
6  
7  
8  
9 259 advertisements for unapproved medicines.

10  
11 260

12  
13  
14 261 **Information provided with the samples**

15  
16 262 Upon examination of the printed materials, the languages of the package inserts were found to

17  
18  
19 263 be in English for 14 (17.1%) of the samples, Chinese for 13 (15.9%), both Chinese and Korean

20  
21  
22 264 for 10 (12.2%), both English and Chinese for 4 (4.9%), Turkish for 2 (2.4%), both English and

23  
24 265 Thai for 1 (1.2%), and English, Chinese and Russian for 1 (1.2%) of the samples. However, 37

25  
26 266 (45.1%-(37)) of the samples did not have any package inserts.

27  
28  
29 267

30  
31  
32 268 **Shipment of the samples**

33  
34 269 Samples were sent by 29 different shipping companies. The majority (13 companies) shipped

35  
36  
37 270 from China, and the second largest group was from India (4 companies). Others were shipped

38  
39  
40 271 from the USA (3), Japan (2), Thailand (2), Switzerland (1), Hong Kong (1), Cambodia (1), the

41  
42 272 Fiji Islands (1), and Puerto Rico (1). The customs declaration was 'health product/personal

43  
44 273 health items' for 20 (24.4%) of the samples, 'supplement' for 13 (15.9%) of the samples,

45  
46 274 'medicine' for 10 (12.2%) of the samples and the actual name of the product in 2 (2.4%) cases.

47  
48  
49 275 However, 12 (14.7%) of the samples were shipped with a declaration of general merchandise

50  
51  
52 276 and/or tea, 11 (13.4%) of them declared 'other' and 14 (17.1%) of them did not mention

1  
2  
3  
4  
5  
6  
7  
8  
9 277 anything as the declaration. Interestingly, one representative from an importing agent of a diet  
10  
11 278 medicine clinic (Sabairato Yanhee MD and clinic, <http://www.gop23.com>) inquired over the  
12  
13  
14 279 telephone regarding the purpose for our purchase of the medicine and asked if we had any  
15  
16  
17 280 relationship with the MHLW, Japan; they did not sell their products to us.  
18  
19  
20  
21 281

### 282 **Sample characteristics**

283 Of the 82 samples, ~~423~~ (512.24%) were advertised on the websites as containing sibutramine  
284 hydrochloride and 15 (18.3%) were advertised as orlistat. Rimonabant, benfluorex, and  
285 lovastatin were advertised to be in two (2.4%) of the samples. Rhei rhubarb was said to be in  
286 one, and the remaining ~~187~~ (210.97%) samples were advertised to be herbal products (Table 1).  
287 All these products were advertised by their brand names. The results of the rhubarb and herbal  
288 products will be reported elsewhere. Out of the 64 synthetic products, 58 samples from 19  
289 different products were prescription medicines, however, none of which requested a prescription  
290 for the purchase. Five brands of orlistat were over-the-counter medicines, and one sample,  
291 Daidai hua, was marketed as a natural supplement. Interestingly, daidai hua ~~However, this~~  
292 ~~product~~ was advertised as sibutramine by its agent, and the sample actually contained  
293 sibutramine as shown by chemical analysis. According to purported country of marketing  
294 authorization holder, 25 sibutramine products originated from India (dispatched from India,

1  
2  
3  
4  
5  
6  
7  
8  
9 295 Hong Kong and Fiji Islands), seven from China (dispatched from China), seven from Germany  
10  
11 296 (dispatched from Hong Kong and Cambodia) and three from Hong Kong (dispatched from  
12  
13  
14 297 Cambodia). Among 15 orlistat products, seven originated from India (dispatched from India and  
15  
16 298 Japan), five from United Kingdom (dispatched from Switzerland, USA and Japan), two from  
17  
18  
19 299 Switzerland (dispatched from Puerto Rico) and one from Thailand (dispatched from Thailand).  
20  
21  
22 300 Two rimonabant, benfluorex and one lovastatin samples originated from India (dispatched from  
23  
24 301 Thailand and Japan), France (dispatched from Hong Kong) and USA (dispatched from USA)  
25  
26  
27 302 respectively. All herbal products (including daidai hua) originated from China, except two (i.e.:  
28  
29 303 Pachyma hoelen), which are from USA, however, dispatched from China.  
30  
31  
32 304

#### 305 **Quality analysis**

306 Out of total, 52 samples (i.e.: Sibutramine: 21, Orlistat: 13, Rimonabant: 2, Benfluorex: 2,  
307 Lovastatin: 1 and herbal products: 13) were analyzed by HPLC to measure quantity of active  
308 ingredients in the samples. Thirty samples were excluded because of the insufficient materials.

309 Quantitative analysis by HPLC showed that all (21) of the samples of sibutramine were in the  
310 acceptable range (90%-110%) except one (mean content percentage of 60.2±7.6). No active  
311 ingredient was detected in three out of the 13 samples of orlistat that we tested (Figure 1). These  
312 three samples were identified to be counterfeit. Of these three counterfeit samples, two were

1  
2  
3  
4  
5  
6  
7  
8  
9 313 found to be Xenical after analysis by the researchers and the manufacturer of the genuine  
10  
11 314 products. No active ingredient was detected in the last sample, only starch (Figure 1). The other  
12  
13 315 counterfeit sample contained unknown excipients. None of the samples of lovastatin, benfluorex  
14  
15  
16 316 or rimonabant failed the HPLC analysis.  
17  
18  
19 317

### 21 318 **Authenticity investigation**

22  
23  
24 319 Responses to our requests for authentication were received from only five of the 20  
25  
26 320 manufacturing companies of the genuine samples. According to the responses that we received,  
27  
28  
29 321 all of the responding manufacturers were GMP compliant. Of the 12 reported samples, two of  
30  
31  
32 322 the orlistat samples (Xenical) from the same manufacturer were confirmed to be counterfeit  
33  
34 323 (Table 24).  
35  
36  
37 324  
38  
39 325  
40  
41  
42 326  
43  
44  
45 327

46  
47 328 Table 24. Results of Authenticity Investigation

| Active ingredient | Labeled cCountry of<br>Authorized mMarketing | Genuine<br>sample | Counterfeit<br>sample | Manufacturing<br>License |
|-------------------|----------------------------------------------|-------------------|-----------------------|--------------------------|
|                   |                                              |                   |                       |                          |

| <u>authorization holder*</u> |             |   |   |         |
|------------------------------|-------------|---|---|---------|
| Orlistat (60 mg)             | USA         | 5 | 0 | YES     |
| Benfluorex (150 mg)          | France      | 2 | 0 | YES     |
| Rimonabant (20 mg)           | India       | 1 | 0 | YES     |
| Orlistat (120 mg)            | Switzerland | 1 | 2 | YES     |
| Rhei Rhubarb                 | China       | 1 | 0 | YES     |
| *Orlistat (120 mg)           | India       | 0 | 1 | Unknown |

329 \* labeled manufacturer did not reply

330

331 The counterfeit samples were purchased at [www.kenkoclinic.com](http://www.kenkoclinic.com) and sent to us from Puerto

332 Rico. They bore the same manufacture and expiration dates (MFD: 02/2011 and EXP: 02/2011,

333 Figure 2) on their blisters, which had not yet occurred at the time of our investigation. The

334 printed information on the blisters of the counterfeits was a different color with a similar but

335 slightly different logo (Figure 3).

336

337 Telephone communications were made to the manufacturer of Zenigal (orlistat 120 mg) in India,

338 which did not contain any of the active ingredients that had been claimed on the product labels.

339 However, the manufacturer did not respond after several communication attempts. This

1  
2  
3  
4  
5  
6  
7  
8  
9 340 counterfeit Zenigal sample was sent to us from Japan. We reported these three cases of  
10  
11 341 counterfeit medicines at the rapid alert system of the Western Pacific Region of the World  
12  
13  
14 342 Health Organization.

15  
16  
17 343

18  
19 344 Responses were received from the medical regulatory authorities of three countries (Germany,  
20  
21 345 Switzerland and USA) for five of the manufacturers. Their responses stated that only orlistat has  
22  
23 346 approval to be manufactured in Switzerland. Approval for the manufacture of sibutramine in  
24  
25  
26  
27 347 Germany was suspended in January 2010, and it was not approved for use in the USA.

28  
29  
30 348

## 31 32 349 **DISCUSSION**

### 33 34 350 **Provided information on the samples**

35  
36  
37 351 According to the Pharmaceutical Affairs Law in Japan, advertising of unapproved medicines is  
38  
39 352 prohibited, and Customs should seize any shipment of prescription medicines when the amount  
40  
41  
42 353 exceeds more than a one-month dose or any non-prescription medicines that exceed more than a  
43  
44  
45 354 two-month dose. However, at least some of the samples in this study that exceeded the approved  
46  
47 355 amount for shipment made it through the regulatory checks during shipping.<sup>[37][19]</sup>

48  
49  
50 356 Surprisingly, at least four of the shipping companies are conducting business in Japan. Contact  
51  
52  
53 357 information was not provided on many of the sites (52.8%), which seemingly contradicts  
54  
55



1  
2  
3  
4  
5  
6  
7  
8  
9 358 ASCT,<sup>[35][20]</sup> According to our study, nearly fifty percent of the sites mentioned dosage  
10  
11 359 administration, effects or side-effects of the medicines, which are not permitted by the  
12  
13 360 pharmaceutical affairs laws (PAL) in Japan.<sup>[37][19]</sup> As found in many previous studies on  
14  
15  
16 361 e-medicines, approximately 50% of the samples did not contain a package insert.<sup>[38-42][21-25]</sup>  
17  
18  
19 362 Moreover, several of the weight-loss products may contain harmful or contraindicated  
20  
21 363 ingredients.<sup>[33, 38][16, 21]</sup> Similar to the findings of a recent study, none of the websites of our  
22  
23  
24 364 study required a prescription to purchase medicines.<sup>[43, 44]</sup>  
25  
26  
27  
28  
29  
30  
31

### 366 Approval status of the products

32 367 The majority of the study samples were sibutramine, which is a selective inhibitor of the central  
33  
34 368 neuronal reuptake of serotonin and noradrenaline and reduces food intake and body  
35  
36  
37 369 weight.<sup>[45][26]</sup> However, after conclusion of the safety review of sibutramine, the European  
38  
39  
40 370 Medicines Agency (EMA) has suspended its marketing authorization in the European Union  
41  
42 371 (EU).<sup>[46][27]</sup> A recently published study reported that generic Figurer (sibutramine 10 mg),  
43  
44  
45 372 even though it has not been reviewed by the responsible government (USA, the exporting  
46  
47 373 nation), is freely circulating via the Internet, which is a serious concern for public  
48  
49  
50 374 health.<sup>[39][22]</sup> According to the medicine regulations of Hong Kong, Figurer does not need  
51  
52  
53 375 manufacturing authorization because the medicine is manufactured in a foreign country. The  
54  
55  
56  
57  
58  
59  
60

Field Code Changed

1  
2  
3  
4  
5  
6  
7  
8  
9 376 authorization status of Ali (orlistat 60 mg) as a prescription medicine has been recommended to  
10  
11 377 transition to a non-prescription medicine in the EU.~~[47][28]~~ In a questionnaire conducted by  
12  
13 378 community pharmacists in Great Britain, orlistat is suspected to be misused by consumers, as  
14  
15 379 stated in their responses.~~[48][29]~~ Similarly, marketing authorization for Acomplia (rimonabant)  
16  
17 380 has also been withdrawn in the EU in January 2009 and safety profiles of other anti-obesity  
18  
19 381 agents are generating controversy in different parts of the world.~~[49-53][30-33]~~ Even though all  
20  
21 382 the anti-obesity agents sampled in this survey are unapproved in Japan, it is possible that anyone  
22  
23 383 can procure these items without declaring the actual contents during shipping.  
24  
25  
26  
27  
28  
29  
30  
31

### 385 **Authenticity and quality of the samples**

386 As similarly shown in previous studies, we observed low rates of authenticity.~~[54][34]~~  
387 Responses from only five (25%) of the manufacturers for 14.6% of the samples were received.  
388 The counterfeit samples identified in this survey were confirmed by the manufacturer of the  
389 corresponding genuine products. Counterfeiting of anti-obesity medicines, particularly orlistat,  
390 has been previously reported.~~[55, 56][35, 36]~~ Based on the external characteristics of the  
391 counterfeits, these products most often differ in their printed information, design, color, etc.  
392 from those of the genuine drugs.~~[17, 57][37, 38]~~ As shown in some other studies, the  
393 counterfeits detected in this survey did not contain any active ingredients.~~[54, 58][34, 39]~~ It is

Field Code Changed

1  
2  
3  
4  
5  
6  
7  
8  
9  
10  
11  
12  
13  
14  
15  
16  
17  
18  
19  
20  
21  
22  
23  
24  
25  
26  
27  
28  
29  
30  
31  
32  
33  
34  
35  
36  
37  
38  
39  
40  
41  
42  
43  
44  
45  
46  
47  
48  
49  
50  
51  
52  
53  
54  
55  
56  
57  
58  
59  
60

394 not clear why the manufacture of Zenigal, which failed the content analysis, did not respond to  
395 our authentication request. In such a case, it can be assumed that the manufacturer is already  
396 aware of the distribution of low-quality products in the pharmaceutical market. Several reports  
397 suggest that patients have sought medical treatment for life-threatening complications after the  
398 consumption of fake or substandard medicines purchased online.<sup>[59][40]</sup> When products are  
399 purchased through the Internet and the sites are not sufficiently regulated, customers are left to  
400 accept the consequences.

402 According to Japanese PAL, a person violating pharmaceutical regulation may be sentenced to  
403 an imprisonment of up to 3 years or imposed a penalty of up to JP¥ 3 million or both.<sup>[60]</sup> In  
404 case of such violation by a company, the penalty may be increased to maximum JP¥ 100  
405 million.<sup>[60]</sup> Nevertheless, PAL has only jurisdiction to regulate domestic traders and has no  
406 hold on foreign online traders. Strengthening international collaboration along with  
407 public-private partnership initiatives may facilitate stemming out illegal internet trading hosted  
408 from outside national boundaries.<sup>[19, 61, 62]</sup>

410 One of the limitations of the study might be small sample size, which may restrict study  
411 findings to Japan. The sampling scheme may also limit our findings from generalization to all

Field Code Changed

Formatted: Font: Not Bold

Field Code Changed

1  
2  
3  
4  
5  
6  
7  
8  
9 412 internet sites. However, the sampling scheme was purposefully designed to investigate  
10  
11 413 suspicious online medicine sites. Our study was not designed comprehensively to explore  
12  
13  
14 414 information during shipment of medicinal products especially at Japanese custom check.  
15  
16 415 Further evaluation with a representative sample may provide more information on the extent of  
17  
18  
19 416 the problem. Low response rate of authenticity investigation may also be considered as a  
20  
21  
22 417 limiting factor. However, better communication and cooperation among authentic manufacturers  
23  
24  
25 418 and medicine regulatory authorities may increase response rate and generate more information  
26  
27 419 to counteract against counterfeits.  
28  
29  
30 420

## 31 421 **CONCLUSIONS**

32  
33  
34 422 It is evident from this study that counterfeit, unapproved and suspended anti-obesity medicines  
35  
36  
37 423 are circulating via the Internet. Because of gaps and the insufficient monitoring system of  
38  
39  
40 424 imports for personal use in the rapidly growing e-commerce environment, these medicines can  
41  
42  
43 425 easily enter into the distribution channels for pharmaceuticals and may pose health hazards for  
44  
45 426 consumers. Time has come to address such gaps of cross-border pharmaceutical e-commerce  
46  
47 427 and to regulate through international cooperation and public-private partnerships. Obviously,  
48  
49  
50 428 first and foremost step should be at country levels to make necessary amendments of existing  
51  
52  
53 429 regulation focusing online pharmaceutical transactions. Side by side, there might be an urgent  
54  
55  
56  
57  
58  
59  
60

1  
2  
3  
4  
5  
6  
7  
8  
9 430 [need at international level to formulate common regulation and agreements focusing issues of](#)  
10  
11 431 [pharmaceutical e-commerce.](#)  
12  
13  
14 432 -  
15  
16  
17 433

18  
19 434 **Acknowledgements** We gratefully acknowledge the cooperation received from the staff of  
20  
21 435 MHLW. Additionally, we thank Ms. Hitomi Tabata for her cooperation in this work.  
22  
23  
24 436

25  
26  
27 437 **Funding** This study was supported by Health and Labour Sciences Research Grants from the  
28  
29 438 MHLW, Japan.  
30  
31

32 439  
33  
34 440 **Competing interests** The authors declare no conflict of interest.  
35  
36

37 441  
38  
39 442  
40  
41  
42 443 **Authors' contribution** MHK, TT, YN, and KK participated in the conception and design of the  
43  
44 444 study; TT, YN and KK participated in sampling activities and analysis of the samples; MHK, TT,  
45  
46 445 YN, NY, HT and KK participated in data analysis and interpretation of results. MHK wrote the  
47  
48 446 first draft of the manuscript. All authors contributed in the critical review of the draft manuscript,  
49  
50 447 editing and finally approved its submitted version.  
51  
52  
53  
54  
55  
56  
57  
58  
59  
60

1  
2  
3  
4  
5  
6  
7  
8  
9  
10  
11  
12  
13  
14  
15  
16  
17  
18  
19  
20  
21  
22  
23  
24  
25  
26  
27  
28  
29  
30  
31  
32  
33  
34  
35  
36  
37  
38  
39  
40  
41  
42  
43  
44  
45  
46  
47  
48  
49  
50  
51  
52  
53  
54  
55  
56  
57  
58  
59  
60

448

449 **Data sharing statement** No additional data available.

450

For peer review only

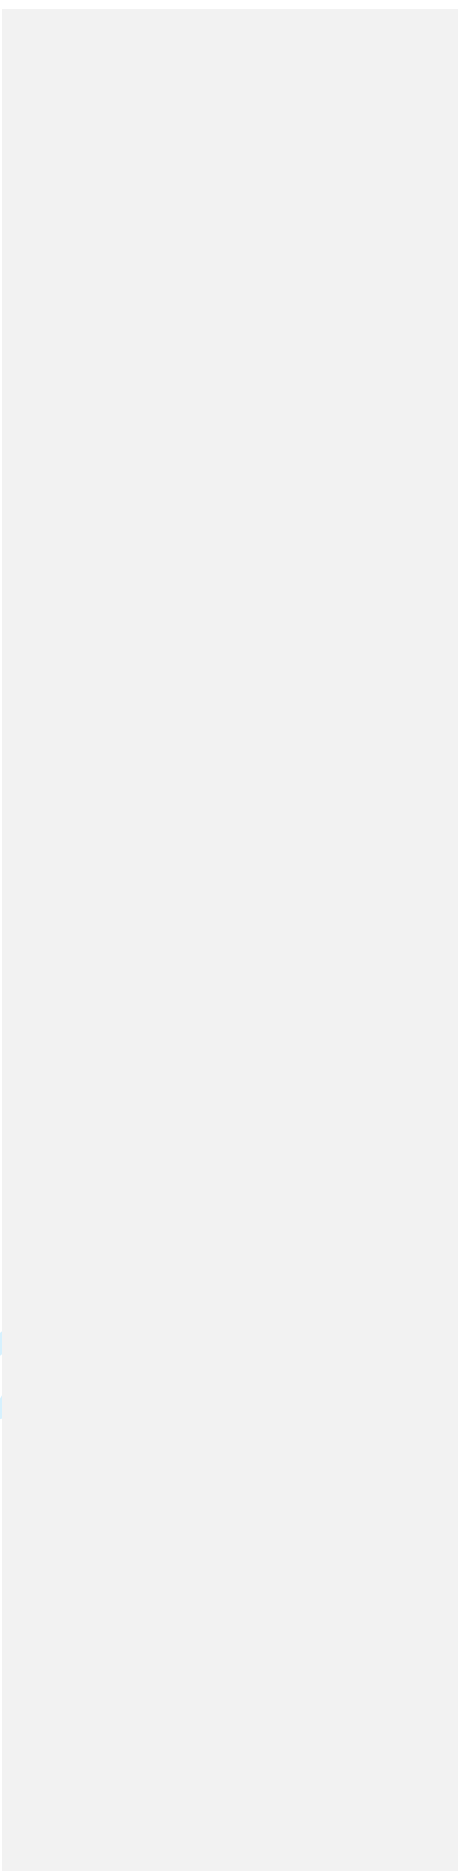

## 451 REFERENCES

452 1. Madden M. America's Online Pursuits: The changing picture of who's online and  
 453 what they do. Washington D. C.: Pew Internet 2003 22 December 2003.

**Formatted:** Indent: Left: 0", First line: 0",  
Line spacing: Double

**Formatted:** Font: Century, 10 pt

454 2. Atkinson NL, Saperstein SL, Pleis J. Using the Internet for Health-Related

455 Activities: Findings From a National Probability Sample. J Med Internet Res 2009;11(1):e4.

**Formatted:** Font: Century, 10 pt, Swedish  
(Sweden)

456 3. Askola K, Atsushi T, Huotari M-L. Cultural Differences in the Health Information

457 Environments and Practices between Finnish and Japanese University Students.

**Formatted:** Font: Century, 10 pt

458 Information Research 2010;15(4):paper 451.

**Formatted:** Font: Century, 10 pt, French  
(France)

459 4. Takahashi Y, Ohura T, Ishizaki T, et al. Internet Use for Health-Related

460 Information via Personal Computers and Cell Phones in Japan: A Cross-Sectional

**Formatted:** Font: Century, 10 pt

461 Population-Based Survey. J Med Internet Res 2011;13(4):e110.

462 5. Araki R, Okumura J, Akazawa M, et al. A survey on the awareness of consumers on

463 their personal import of medicines from public health view point. Japanese Journal of Social

464 Pharmacy 2010;28(3):134-5.

465 6. WHO. Medicines: counterfeit medicines. Geneva: World Health Organization;

466 2010 [cited 8 March 2010]; Fact sheet No. 275]. Available from:

467 <http://www.who.int/mediacentre/factsheets/fs275/en/index.html>.

**Formatted:** Hyperlink, Font: Century, 10 pt

**Formatted:** Font: Century, 10 pt

468 7. WHO. Counterfeit Drugs: Guidelines for the development of measures to combat

- 1  
2  
3  
4  
5  
6  
7  
8  
9 469 [counterfeit drugs Geneva, Switzerland: Department of Essential Drugs and Other](#)
- 10  
11 470 [Medicines. World Health Organization 1999. Report No.: \(WHO/EDM/QSM/99.1\).](#)
- 12  
13  
14 471 [8. WHO. General information on counterfeit medicines. Geneva: World Health](#)
- 15  
16  
17 472 [Organization; 2009 \[cited May 27 2009\]; Available from:](#)
- 18  
19 473 <http://www.who.int/medicines/services/counterfeit/overview/en/>.
- 20  
21  
22 474 [9. IMPACT. Principles and Elements for National Legislation against Counterfeit](#)
- 23  
24 475 [Medical products: Text endorsed by IMPACT General Meeting. Lisbon: International](#)
- 25  
26  
27 476 [Medical Products Anti-Counterfeiting Taskforce 2007 12 December 2007.](#)
- 28  
29 477 [10. WHO. What are substandard drugs? Geneva: World Health Organization; 2009](#)
- 30  
31  
32 478 [\[cited July 15 2009\]; Available from:](#)
- 33  
34 479 <http://www.who.int/medicines/services/counterfeit/faqs/06/en/index.html>.
- 35  
36  
37 480 [11. Surendran A. World agencies try to stem flood of fake drugs. Nat Med 2004 Feb](#)
- 38  
39 481 [2004;10\(2\):111.](#)
- 40  
41  
42 482 [12. Kelesidis T, Kelesidis I, Rafailidis PI, et al. Counterfeit or substandard](#)
- 43  
44 483 [antimicrobial drugs: a review of the scientific evidence. J Antimicrob Chemother 2007](#)
- 45  
46  
47 484 [August 1, 2007;60\(2\):214-36.](#)
- 48  
49  
50 485 [13. Kaur H, Goodman C, Thompson E, et al. A nationwide survey of the quality of](#)
- 51  
52 486 [antimalarials in retail outlets in Tanzania. PLoS One 2008;3:e3403.](#)
- 53  
54  
55  
56  
57  
58  
59  
60

Formatted: Hyperlink, Font: Century, 10 pt

Formatted: Font: Century, 10 pt

Formatted: Hyperlink, Font: Century, 10 pt

Formatted: Font: Century, 10 pt

Formatted: Font: Century, 10 pt, Norwegian (Bokmål)

Formatted: Font: Century, 10 pt

Formatted: Font: Century, 10 pt, Portuguese (Brazil)



- 1  
2  
3  
4  
5  
6  
7  
8  
9 487 14. Onwujekwe O, Kaur H, Dike N, et al. Quality of anti-malarial drugs provided by  
10  
11 public and private healthcare providers in south-east Nigeria. Malar J 2009;8(1):22.  
12  
13  
14 489 15. Newton PN, Green MD, Fernández FM, et al. Counterfeit anti-infective drugs.  
15  
16 Lancet Infect Dis. [Review]. 2006 September 2006;6(9):602-13.  
17  
18  
19 491 16. Khan AY, Ghilzai NMK. Counterfeit and substandard quality of drugs: The need  
20  
21 for an effective and stringent regulatory control in India and other developing countries.  
22  
23 Indian J Pharmacol. [Research Letter]. 2007;39(4):206-7.  
24  
25  
26 494 17. Newton PN, Fernández FM, Plançon A, et al. A Collaborative Epidemiological  
27  
28 Investigation into the Criminal Fake Artesunate Trade in South East Asia. PLoS Med  
29  
30 2008;5(2):e32.  
31  
32  
33 497 18. Liang BA, Mackey T. Searching for Safety: Addressing Search Engine, Website,  
34  
35 and Provider Accountability for Illicit Online Drug Sales. American Journal of Law &  
36  
37 Medicine 2009;35 (2009):125-84.  
38  
39  
40 500 19. Mackey TK, Liang BA. The global counterfeit drug trade: Patient safety and public  
41  
42 health risks. J Pharm Sci 2011;100(11):4571-9.  
43  
44  
45 501 20. Letkiewicz S, Górski A. The Potential Dual Use of Online Pharmacies. Science and  
46  
47 Engineering Ethics 2010;16(1):59-75.  
48  
49  
50 503 21. WHO. 2008-2013 Action Plan for the Global Strategy for the Prevention and  
51  
52  
53 504

Formatted: Font: Century, 10 pt

- 1  
2  
3  
4  
5  
6  
7  
8  
9 505 [Control of Noncommunicable Diseases. Organization WH, editor. Geneva: World Health](#)  
10  
11 506 [Organization; 2008.](#)  
12  
13  
14 507 [22. James WPT. The epidemiology of obesity: the size of the problem. Blackwell](#)  
15  
16 508 [Publishing Ltd; 2008. p. 336-52.](#)  
17  
18  
19 509 [23. Moreno LA, Pigeot I, Ahrens W, et al. Prevalence of Overweight and Obesity in](#)  
20  
21 [Japan. Epidemiology of Obesity in Children and Adolescents: Springer New York; 2011. p.](#)  
22 [153-62.](#)  
23  
24 511  
25  
26 512 [24. Snow V, Barry P, Fitterman N, et al. Pharmacologic and Surgical Management of](#)  
27  
28 [Obesity in Primary Care: A Clinical Practice Guideline from the American College of](#)  
29 [Physicians. Ann Intern Med 2005 April 5, 2005;142\(7\):525-31.](#)  
30  
31 513  
32 514  
33  
34 515 [25. Lowes R, Waknine Y. FDA Announces Sibutramine Has Been Withdrawn From the](#)  
35 [Market. Medscape Education \[serial on the Internet\]. 2010 \[cited 2011 25 October\]:](#)  
36 [Available from: http://www.medscape.org/viewarticle/730515.](#)  
37  
38  
39 517  
40  
41 518 [26. FDA. FDA Drug Safety Communication: FDA Recommends Against the Continued](#)  
42 [Use of Meridia \(sibutramine\). Rockville, MD 2010 \[updated 8 October 2010; cited 25](#)  
43 [October 2011.\]; Available from: http://www.fda.gov/Drugs/DrugSafety/ucm228746.htm.](#)  
44  
45  
46 519  
47 520  
48  
49 521 [27. MHLW. Authorization status of drugs in Japan. Tokyo: Ministry of Health and](#)  
50  
51 [Labour Welfare; 2011 \[cited June 30 2011\]; Available from:](#)  
52  
53  
54  
55  
56  
57  
58  
59  
60

Formatted: Hyperlink, Font: Century, 10 pt

Formatted: Font: Century, 10 pt

Formatted: Hyperlink, Font: Century, 10 pt

Formatted: Font: Century, 10 pt

1  
2  
3  
4  
5  
6  
7  
8  
9 523 [http://www.info.pmda.go.jp/psearch/html/menu\\_tenpu\\_base.html](http://www.info.pmda.go.jp/psearch/html/menu_tenpu_base.html).

Formatted: Hyperlink, Font: Century, 10 pt

Formatted: Font: Century, 10 pt

10  
11 524 [28. Tsuji K, Tsutani K. Personal imports of drugs to Japan in 2005 – an analysis of](#)

12  
13  
14 525 [import certificates. J Clin Pharm Ther 2008;33\(5\):545-52.](#)

15  
16 526 [29. Eisai. Withdrawal of approval for manufacture and sale of a therapeutic agent for](#)

17  
18  
19 527 [obesity in Japan KES524. Tokyo: Eisai Co., Ltd.; 2010 \[cited 7 March 2010\]; Available](#)

20  
21 528 [from: http://www.eisai.co.jp/news/news201057.html.](#)

Formatted: Hyperlink, Font: Century, 10 pt

Formatted: Font: Century, 10 pt

22  
23  
24 529 [30. E. deKieffer D. The Internet and the Globalization of Counterfeit Drugs. Journal of](#)

25  
26  
27 530 [Pharmacy Practice 2006 June 1, 2006;19\(3\):171-7.](#)

28  
29 531 [31. Jackson G. Faking it: the dangers of counterfeit medicine on the internet. Int J Clin](#)

30  
31  
32 532 [Pract 2009;63\(2\):181.](#)

33  
34 533 [32. Bogenschutz MP. Drugs on the Internet. Am J Psychiatry 2001 December 1,](#)

35  
36  
37 534 [2001;158\(12\):2094-a-5.](#)

38  
39 535 [33. MHLW. Warning on health hazard due to counterfeit medicines. Tokyo: Ministry](#)

40  
41  
42 536 [of Health and Labour Welfare; 2011 \[cited October 4 2011\]; Available from:](#)

43  
44 537 <http://www.mhlw.go.jp/stf/houdou/2r9852000001agwf-att/2r9852000001ah0e.pdf>.

Formatted: Hyperlink, Font: Century, 10 pt

Formatted: Font: Century, 10 pt

45  
46  
47 538 [34. Pfizer. Result of joint investigation done by four manufacturers: Approximately](#)

48  
49  
50 539 [60% of ED treatment medicines are counterfeits on the Internet. Tokyo 2009; Available](#)

51  
52 540 [from: http://www.pfizer.co.jp/pfizer/company/press/2009/2009\\_12\\_02.html.](#)

Formatted: Hyperlink, Font: Century, 10 pt

Formatted: Font: Century, 10 pt

- 1  
2  
3  
4  
5  
6  
7  
8  
9 541 [35. Specified Commercial Transaction Law to Regulate Mail-order Business. \(1976\).](#)
- 10  
11 542 [36. Aka E, Legris C, Tanimoto T, et al. Counterfeit medicine detection by authenticity](#)
- 12  
13 [investigation: A pilot study in the street market of Côte d'Ivoire. Japanese Journal of Social](#)
- 14  
15 [Pharmacy 2005;24\(2\):7-16.](#)
- 16  
17 544
- 18  
19 545 [37. MHLW. Pharmaceutical affairs law, Japan. Tokyo: Ministry of Health and Labour](#)
- 20  
21 [Welfare; 2011 \[cited October 4 2011\]; Available from:](#)
- 22  
23 <http://www.houko.com/00/01/S35/145.HTM>
- 24  
25 547
- 26  
27 548 [38. Nazeri A, Massumi A, Wilson JM, et al. Arrhythmogenicity of weight-loss](#)
- 28  
29 [supplements marketed on the Internet. Heart Rhythm 2009;6\(5\):658-62.](#)
- 30  
31 549
- 32  
33 550 [39. Kimura K, Honma T, Tanimoto T, et al. Public Health Implication of Personal](#)
- 34  
35 [Import of Medicines through Internet Brokers \(2\): Buying Anti-obesity Agents On-line. J](#)
- 36  
37 [Health Care & Society 2011;21:55-67.](#)
- 38  
39 551
- 40  
41 552 [40. Veronin MA, Youan B-BC. Magic Bullet Gone Astray: Medications and the Internet.](#)
- 42  
43 [Science 2004 July 23, 2004;305\(5683\):481.](#)
- 44  
45 554
- 46  
47 555 [41. Martin-Facklam M, Kostrzewa M, Schubert F, et al. Quality markers of drug](#)
- 48  
49 [information on the internet: an evaluation of sites about St. John's Wort. The American](#)
- 50  
51 [Journal of Medicine 2002;113\(9\):740-5.](#)
- 52  
53 557
- 54  
55 558 [42. Westenberger BJ, Ellison CD, Fussner AS, et al. Quality assessment of internet](#)

Formatted: Hyperlink, Font: Century, 10 pt

Formatted: Font: Century, 10 pt

- 1  
2  
3  
4  
5  
6  
7  
8  
9 559 [pharmaceutical products using traditional and non-traditional analytical techniques. Int J](#)  
10  
11 560 [Pharm 2005;306\(1-2\):56-70.](#)  
12  
13  
14 561 [43. Orizio G, Rubinelli S, Schulz PJ, et al. "Save 30% if you buy today". Online](#)  
15  
16 562 [pharmacies and the enhancement of peripheral thinking in consumers. Pharmacoepidemiol](#)  
17  
18 563 [Drug Saf 2010;19\(9\):970-6.](#)  
19  
20  
21 564 [44. Orizio G, Merla A, Schulz PJ, et al. Quality of Online Pharmacies and Websites](#)  
22  
23 565 [Selling Prescription Drugs: A Systematic Review. Journal of Medical Internet Research](#)  
24  
25 566 [2011;13\(3\):e74.](#)  
26  
27  
28 567 [45. Tziomalos K, Krassas GE, Tzotzas T. The use of sibutramine in the management of](#)  
29  
30 568 [obesity and related disorders: An update. Vascular Health and Risk Management](#)  
31  
32 569 [2009;5:441-52.](#)  
33  
34  
35 570 [46. EMEA. European Medicines Agency recommends suspension of marketing](#)  
36  
37 571 [authorisation for Sibutramine. London: European Medicines Agency; 2010 \[updated](#)  
38  
39 572 [January 21, 2010; cited June 9, 2011\]; Available from:](#)  
40  
41 573 [http://www.ema.europa.eu/ema/index.jsp?curl=pages/news\\_and\\_events/news/2010/01/news](http://www.ema.europa.eu/ema/index.jsp?curl=pages/news_and_events/news/2010/01/news)  
42  
43 574 [detail\\_000985.jsp&curl=pages/news\\_and\\_events/news/2010/01/news\\_and\\_events.jsp&mid=WC0b01ac05](#)  
44  
45 575 [8004d5c1.](#)  
46  
47  
48  
49  
50  
51  
52 576 [47. EMEA. European Medicines Agency recommends first switch from prescription](#)  
53  
54  
55  
56  
57  
58  
59  
60

Formatted: Hyperlink, Font: Century, 10 pt

Formatted: Font: Century, 10 pt

- 1  
2  
3  
4  
5  
6  
7  
8  
9 577 [only to non-prescription for a centrally authorised medicine. Doc. Ref.](#)
- 10  
11 578 [EMA/CHMP/493770/2008. 2008 \[cited June 24 2011\]; Available from:](#)
- 12  
13  
14 579 [http://www.ema.europa.eu/ema/index.jsp?curl=pages/news\\_and\\_events/news/2009/11/news](http://www.ema.europa.eu/ema/index.jsp?curl=pages/news_and_events/news/2009/11/news_detail_000256.jsp&murl=menus/news_and_events/news_and_events.jsp&mid=WC0b01ac05_8004d5c1&jsenabled=true)
- 15  
16  
17 580 [detail\\_000256.jsp&murl=menus/news\\_and\\_events/news\\_and\\_events.jsp&mid=WC0b01ac05](http://www.ema.europa.eu/ema/index.jsp?curl=pages/news_and_events/news/2009/11/news_detail_000256.jsp&murl=menus/news_and_events/news_and_events.jsp&mid=WC0b01ac05_8004d5c1&jsenabled=true)
- 18  
19 581 [8004d5c1&jsenabled=true](http://www.ema.europa.eu/ema/index.jsp?curl=pages/news_and_events/news/2009/11/news_detail_000256.jsp&murl=menus/news_and_events/news_and_events.jsp&mid=WC0b01ac05_8004d5c1&jsenabled=true).
- 20  
21  
22 582 [48. Weidmann A, Cunningham S, Gray G, et al. Over-the-counter orlistat: early](#)
- 23  
24 583 [experiences, views and attitudes of community pharmacists in Great Britain. International](#)
- 25  
26  
27 584 [Journal of Clinical Pharmacy 2011;1-7.](#)
- 28  
29 585 [49. Alsheikh-Ali AA, Karas RH. Safety of Lovastatin/Extended Release Niacin](#)
- 30  
31  
32 586 [Compared With Lovastatin Alone, Atorvastatin Alone, Pravastatin Alone, and Simvastatin](#)
- 33  
34 587 [Alone \(from the United States Food and Drug Administration Adverse Event Reporting](#)
- 35  
36  
37 588 [System\). The American journal of cardiology 2007;99\(3\):379-81.](#)
- 38  
39 589 [50. Calza L. Long-term use of rosuvastatin: a critical risk benefit appraisal and](#)
- 40  
41  
42 590 [comparison with other antihyperlipidemics. Drug, Healthcare and Patient Safety](#)
- 43  
44  
45 591 [2009;1:25-33.](#)
- 46  
47 592 [51. Perrio MJ, Wilton LV, Shakir SAW. The Safety Profiles of Orlistat and Sibutramine:](#)
- 48  
49  
50 593 [Results of Prescription-Event Monitoring Studies in England. Obesity 2007;15\(11\):2712-22.](#)
- 51  
52  
53 594 [52. EMA. European Medicines Agency recommends withdrawal of benfluorex from](#)

Formatted: Hyperlink, Font: Century, 10 pt

Formatted: Font: Century, 10 pt

595 [the market in European Union. London: European Medicines Agency; 2009 \[updated](#)

596 [December 18, 2009; cited June 9, 2011\]; Available from:](#)

597 [http://www.ema.europa.eu/ema/index.jsp?curl=pages/news\\_and\\_events/news/2010/01/news](http://www.ema.europa.eu/ema/index.jsp?curl=pages/news_and_events/news/2010/01/news_detail_000977.jsp&murl=menus/news_and_events/news_and_events.jsp&mid=WC0b01ac058004d5c1&jsenabled=true)

Formatted: Hyperlink, Font: Century, 10 pt

598 [detail\\_000977.jsp&murl=menus/news\\_and\\_events/news\\_and\\_events.jsp&mid=WC0b01ac05](http://www.ema.europa.eu/ema/index.jsp?curl=pages/news_and_events/news/2010/01/news_detail_000977.jsp&murl=menus/news_and_events/news_and_events.jsp&mid=WC0b01ac058004d5c1&jsenabled=true)

599 [8004d5c1&jsenabled=true](http://www.ema.europa.eu/ema/index.jsp?curl=pages/news_and_events/news/2010/01/news_detail_000977.jsp&murl=menus/news_and_events/news_and_events.jsp&mid=WC0b01ac058004d5c1&jsenabled=true).

Formatted: Font: Century, 10 pt

600 [53. EMEA. Public statement on Acomplia: withdrawal of the marketing authorisation](#)

601 [in the European Union. London: European Medicines Agency; 2009 \[updated January 30,](#)

602 [2009; cited June 9, 2011\]; Available from:](#)

603 [http://www.ema.europa.eu/ema/index.jsp?curl=pages/news\\_and\\_events/news/2009/11/news\\_det](http://www.ema.europa.eu/ema/index.jsp?curl=pages/news_and_events/news/2009/11/news_detail_000126.jsp&murl=menus/news_and_events/news_and_events.jsp&mid=WC0b01ac058004d5c1)

Formatted: Hyperlink

604 [ail\\_000126.jsp&murl=menus/news\\_and\\_events/news\\_and\\_events.jsp&mid=WC0b01ac058004](http://www.ema.europa.eu/ema/index.jsp?curl=pages/news_and_events/news/2009/11/news_detail_000126.jsp&murl=menus/news_and_events/news_and_events.jsp&mid=WC0b01ac058004d5c1)

605 [d5c1](http://www.ema.europa.eu/ema/index.jsp?curl=pages/news_and_events/news/2009/11/news_detail_000126.jsp&murl=menus/news_and_events/news_and_events.jsp&mid=WC0b01ac058004d5c1).

Formatted: Font: Century, 10 pt

606 [54. Khan M, Okumura J, Sovannarith T, et al. Counterfeit Medicines in](#)

Formatted: Font: Century, 10 pt, Swedish (Sweden)

Formatted: Font: Century, 10 pt

607 [Cambodia—Possible Causes. Pharm Res 2011;28\(3\):484-9.](#)

608 [55. FDA Warns Consumers about Counterfeit Alli \[database on the Internet\]. U.S.](#)

609 [Food and Drug Administration. 2010 \[cited 3 October 2011\]. Available from:](#)

610 <http://www.fda.gov/NewsEvents/Newsroom/PressAnnouncements/ucm197857.htm>.

Formatted: Hyperlink, Font: Century, 10 pt

Formatted: Font: Century, 10 pt

611 [56. UPDATED Public Health Alert: Counterfeit Alli containing sibutramine \[database](#)

612 [on the Internet\]. U.S. Food and Drug Administration. 2010 \[cited 3 October 2011\].](#)

613 Available from:

614 [http://www.fda.gov/Drugs/DrugSafety/PostmarketDrugSafetyInformationforPatientsandPro](http://www.fda.gov/Drugs/DrugSafety/PostmarketDrugSafetyInformationforPatientsandProviders/ucm198519.htm)  
615 [viders/ucm198519.htm](http://www.fda.gov/Drugs/DrugSafety/PostmarketDrugSafetyInformationforPatientsandProviders/ucm198519.htm)

Formatted: Hyperlink, Font: Century, 10 pt

Formatted: Font: Century, 10 pt

616 57. Dondorp AM, Newton PN, Mayxay M, et al. Fake antimalarials in Southeast Asia

617 are a major impediment to malaria control: multinational cross-sectional survey on the

618 prevalence of fake antimalarials. Trop Med Int Health 2004;9(12):1241-6.

619 58. Khan MH, Okumura J, Sovannarith T, et al. Prevalence of counterfeit

620 anti-helminthic medicines: a cross-sectional survey in Cambodia (DOI:

621 10.1111/j.1365-3156.2010.02494.x). Trop Med Int Health 2010 May 15(5):639-44.

622 59. Lineberry TW, Bostwick JM. Taking the Physician Out of "Physician Shopping": A

623 Case Series of Clinical Problems Associated With Internet Purchases of Medication. Mayo

624 Clin Proc 2004 August 1, 2004;79(8):1031-4.

625 60. MHLW. Pharmaceutical affairs law, Japan. Tokyo: Ministry of Health and Labour

626 Welfare; 1961 [cited October 4 2011]; Available from:

627 <http://www.houko.com/00/01/S35/145.HTM>

Formatted: Hyperlink, Font: Century, 10 pt

Formatted: Font: Century, 10 pt

628 61. Mackey TK, Liang BA. Promoting online drug safety: Using public-private

629 partnerships to deter illicit online drug sales. Journal of Commercial Biotechnology

630 2011;17(3):266-71.



- 1  
2  
3  
4  
5  
6  
7  
8  
9 631 [62. Cockburn R, Newton PN, Agyarko EK, et al. The Global Threat of Counterfeit](#)  
10  
11 [Drugs: Why Industry and Governments Must Communicate the Dangers. PLoS Med](#)  
12  
13 [2005;2\(4\):e100.](#)  
14 633  
15  
16 634  
17  
18  
19 635 [1. Madden M. America's Online Pursuits: The changing picture of who's online and](#)  
20  
21 [what they do. Washington D. C.: Pew Internet 22 December 2003.](#)  
22 636  
23  
24 637 [2. Atkinson NL, Saperstein SL, Pleis J. Using the Internet for Health-Related](#)  
25  
26 [Activities: Findings From a National Probability Sample. J Med Internet Res 2009;11\(1\):e4.](#)  
27 638  
28  
29 639 [3. Araki R, Okumura J, Akazawa M, et al. A survey on the awareness of consumers on](#)  
30  
31 [their personal import of medicines from public health view point. Japanese Journal of Social](#)  
32 640  
33 [Pharmacy 2010;28\(3\):134-5.](#)  
34 641  
35  
36 642 [4. WHO. Medicines: counterfeit medicines. Geneva: World Health Organization;](#)  
37  
38 [2010 \[cited 8 March 2010\]; Fact sheet No. 275\]. Available from:](#)  
39 643  
40 <http://www.who.int/mediacentre/factsheets/fs275/en/index.html>.  
41 644  
42  
43 645 [5. WHO. 2008-2013 Action Plan for the Global Strategy for the Prevention and](#)  
44  
45 [Control of Noncommunicable Diseases. Organization WH, editor. Geneva: World Health](#)  
46 646  
47 [Organization; 2008.](#)  
48 647  
49  
50 648 [6. James WPT. The epidemiology of obesity: the size of the problem. Blackwell](#)  
51  
52  
53  
54  
55  
56  
57  
58  
59  
60

- 1  
2  
3  
4  
5  
6  
7  
8  
9 649 ~~Publishing Ltd; 2008. p. 336-52.~~
- 10  
11 650 ~~7. ——— Moreno LA, Pigeot I, Ahrens W, et al. Prevalence of Overweight and Obesity in~~
- 12  
13  
14 651 ~~Japan. — Epidemiology of Obesity in Children and Adolescents: Springer New York; 2011. p-~~
- 15  
16 652 ~~153-62.~~
- 17  
18  
19 653 ~~8. ——— Snow V, Barry P, Fitterman N, et al. Pharmacologic and Surgical Management of~~
- 20  
21 654 ~~Obesity in Primary Care: A Clinical Practice Guideline from the American College of~~
- 22  
23  
24 655 ~~Physicians. Ann Intern Med, 2005;142(7):525-31.~~
- 25  
26  
27 656 ~~9. ——— Lowes R, Waknine Y. FDA Announces Sibutramine Has Been Withdrawn From the~~
- 28  
29 657 ~~Market. Medscape Education [serial on the Internet]. 2010 [cited 25 October 2011];-~~
- 30  
31  
32 658 ~~Available from: <http://www.medscape.org/viewarticle/730515>.~~
- 33  
34  
35 659 ~~10. ——— FDA. FDA Drug Safety Communication: FDA Recommends Against the Continued-~~
- 36  
37 660 ~~Use of Meridia (sibutramine). — Rockville, MD 2010 [updated 8 October 2010; cited 2011, 25-~~
- 38  
39  
40 661 ~~October]; Available from: <http://www.fda.gov/Drugs/DrugSafety/ucm228746.htm>.~~
- 41  
42 662 ~~11. ——— MHLW. Authorization status of drugs in Japan. — Tokyo: Ministry of Health and~~
- 43  
44  
45 663 ~~Labour Welfare; 2011 [cited 2011 June 30]; Available from:-~~
- 46  
47 664 ~~[http://www.info.pmda.go.jp/psearch/html/menu\\_tenpu\\_base.html](http://www.info.pmda.go.jp/psearch/html/menu_tenpu_base.html).~~
- 48  
49  
50 665 ~~12. ——— Tsuji K, Tsutani K. Personal imports of drugs to Japan in 2005 — an analysis of~~
- 51  
52  
53 666 ~~import certificates. J Clin Pharm Ther 2008;33(5):545-52.~~

- 1  
2  
3  
4  
5  
6  
7  
8  
9 667 13. ——— E. deKieffer D. The Internet and the Globalization of Counterfeit Drugs. *Journal of*  
10  
11 668 *Pharmacy Practice*, 2006;19(3):171-7.
- 12  
13  
14 669 14. ——— Jackson G. Faking it: the dangers of counterfeit medicine on the internet. *Int J Clin*  
15  
16 670 *Pract* 2009;63(2):181.
- 17  
18  
19 671 15. ——— Bogenschutz MP. Drugs on the Internet. *Am J Psychiatry*, 2001;158(12):2094-a-5.
- 20  
21  
22 672 16. ——— MHLW. Warning on health hazard due to counterfeit medicines. —Tokyo: Ministry-  
23  
24 673 of Health and Labour Welfare; —2011 [cited 4 October 2011]; Available from:-  
25  
26 674 <http://www.mhlw.go.jp/stf/houdou/2r9852000001agwf-att/2r9852000001ah0e.pdf>.
- 27  
28  
29 675 17. ——— Aka E, Legris C, Tanimoto T, et al. Counterfeit medicine detection by authenticity-  
30  
31 676 investigation: A pilot study in the street market of Côte-d'Ivoire. *Japanese Journal of Social*  
32  
33 677 *Pharmacy* 2005;24(2):7-16.
- 34  
35  
36  
37 678 18. ——— WHO. Counterfeit Drugs: Guidelines for the development of measures to combat  
38  
39 679 counterfeit drugs. Geneva, Switzerland: Department of Essential Drugs and Other-  
40  
41 680 Medicines, World Health Organization 1999. Report No.: (WHO/EDM/QSM/99.1).
- 42  
43  
44 681 19. ——— MHLW. Pharmaceutical affairs law, Japan. —Tokyo: Ministry of Health and Labour  
45  
46 682 Welfare; 2011 [cited 4 October 2011]; Available from:-  
47  
48 683 <http://www.houko.com/00/01/S35/145.HTM>.
- 49  
50  
51  
52 684 20. ——— Specified Commercial Transaction Law to Regulate Mail-order Business, (1976).
- 53  
54  
55  
56  
57  
58  
59  
60

- 1  
2  
3  
4  
5  
6  
7  
8  
9 685 ~~21. Nazeri A, Massumi A, Wilson JM, et al. Arrhythmogenicity of weight-loss~~  
10  
11 686 ~~supplements marketed on the Internet. Heart Rhythm 2009;6(5):658-62.~~  
12  
13  
14 687 ~~22. Kimura K, Honma T, Tanimoto T, et al. Public Health Implication of Personal~~  
15  
16 688 ~~Import of Medicines through Internet Brokers (2): Buying Anti-obesity Agents On-line. J~~  
17  
18 689 ~~Health Care & Society 2011;21:55-67.~~  
19  
20  
21 690 ~~23. Veronin MA, Youan B-BC. Magic Bullet Gone Astray: Medications and the Internet.~~  
22  
23 691 ~~Science, 2004;305(5683):481.~~  
24  
25  
26  
27 692 ~~24. Martin-Facklam M, Kostrzewa M, Schubert F, et al. Quality markers of drug~~  
28  
29 693 ~~information on the internet: an evaluation of sites about St. John's Wort. The American~~  
30  
31 694 ~~Journal of Medicine 2002;113(9):740-5.~~  
32  
33  
34 695 ~~25. Westenberger BJ, Ellison CD, Fussner AS, et al. Quality assessment of internet~~  
35  
36 696 ~~pharmaceutical products using traditional and non-traditional analytical techniques. Int J~~  
37  
38 697 ~~Pharm 2005;306(1-2):56-70.~~  
39  
40  
41 698 ~~26. Tziomalos K, Krassas GE, Tzotzas T. The use of sibutramine in the management of~~  
42  
43 699 ~~obesity and related disorders: An update. Vascular Health and Risk Management~~  
44  
45 700 ~~2009;5:441-52.~~  
46  
47  
48 701 ~~27. EMEA. European Medicines Agency recommends suspension of marketing~~  
49  
50 702 ~~authorisation for Sibutramine. London: European Medicines Agency; 2010 [updated 21-~~  
51  
52  
53  
54  
55  
56  
57  
58  
59  
60

Formatted: English (U.S.)

1  
2  
3  
4  
5  
6  
7  
8  
9 703 ~~January 2010; cited 9 June 2011]; Available from:~~  
10  
11 704 ~~[http://www.ema.europa.eu/ema/index.jsp?curl=pages/news\\_and\\_events/news/2010/01/news\\_](http://www.ema.europa.eu/ema/index.jsp?curl=pages/news_and_events/news/2010/01/news_)~~  
12  
13 705 ~~[detail\\_000985.jsp&curl=pages/news\\_and\\_events/news\\_and\\_events.jsp&mid=WC0b01ac05](detail_000985.jsp&curl=pages/news_and_events/news_and_events.jsp&mid=WC0b01ac05)~~  
14  
15  
16 706 ~~<8004d5e1>~~  
17  
18 707 ~~28. — EMEA. European Medicines Agency recommends first switch from prescription~~  
19  
20  
21 708 ~~only to non-prescription for a centrally authorised medicine. Doc. Ref.~~  
22  
23  
24 709 ~~EMEA/CHMP/493770/2008. — 2008 [cited 24 June 2011]; Available from:~~  
25  
26  
27 710 ~~[http://www.ema.europa.eu/ema/index.jsp?curl=pages/news\\_and\\_events/news/2009/11/news\\_](http://www.ema.europa.eu/ema/index.jsp?curl=pages/news_and_events/news/2009/11/news_)~~  
28  
29 711 ~~[detail\\_000256.jsp&curl=pages/news\\_and\\_events/news\\_and\\_events.jsp&mid=WC0b01ac05](detail_000256.jsp&curl=pages/news_and_events/news_and_events.jsp&mid=WC0b01ac05)~~  
30  
31 712 ~~<8004d5e1&jsenabled=true>~~  
32  
33  
34 713 ~~29. — Weidmann A, Cunningham S, Gray C, et al. Over-the-counter orlistat: early~~  
35  
36  
37 714 ~~experiences, views and attitudes of community pharmacists in Great Britain. International~~  
38  
39 715 ~~Journal of Clinical Pharmacy 2011;1-7.~~  
40  
41  
42 716 ~~30. — Alsheikh-Ali AA, Karas RH. Safety of Lovastatin/Extended Release Niacin~~  
43  
44  
45 717 ~~Compared With Lovastatin Alone, Atorvastatin Alone, Pravastatin Alone, and Simvastatin~~  
46  
47 718 ~~Alone (from the United States Food and Drug Administration Adverse Event Reporting~~  
48  
49 719 ~~System). The American journal of cardiology 2007;99(3):379-81.~~  
50  
51  
52 720 ~~31. — Calza L. Long-term use of rosuvastatin: a critical risk-benefit appraisal and~~  
53  
54  
55  
56  
57  
58  
59  
60

1  
2  
3  
4  
5  
6  
7  
8  
9 721 ~~comparison with other antihyperlipidemics. Drug, Healthcare and Patient Safety~~  
10  
11 722 ~~2009;1:25-33.~~  
12  
13  
14 723 ~~32. ——— Perrio MJ, Wilton LV, Shakir SAW. The Safety Profiles of Orlistat and Sibutramine:~~  
15  
16  
17 724 ~~Results of Prescription-Event Monitoring Studies in England. Obesity 2007;15(11):2712-22.~~  
18  
19 725 ~~33. ——— EMEA. European Medicines Agency recommends withdrawal of benfluorex from~~  
20  
21 726 ~~the market in European Union. — London: European Medicines Agency; 2009 [updated 18~~  
22  
23 727 ~~December 2009; cited 9 June 2011]; Available from:~~  
24  
25 728   
28  
29 730   
32  
33 732   
36  
37 734   
40  
41 736   
44  
45 738 ~~[Formatted: English \(U.S.\)](http://www.ema.europa.eu/ema/index.jsp?curl=pages/news_and_events/news/2010/01/news_</a></del><br/>46<br/>47<br/>48<br/>49<br/>50<br/>51<br/>52<br/>53<br/>54<br/>55<br/>56<br/>57<br/>58<br/>59<br/>60</p></div><div data-bbox=)~~

1  
2  
3  
4  
5  
6  
7  
8  
9 739 [http://www.fda.gov/Drugs/DrugSafety/PostmarketDrugSafetyInformationforPatientsandPro](http://www.fda.gov/Drugs/DrugSafety/PostmarketDrugSafetyInformationforPatientsandProviders/ucm108519.htm)  
10  
11 740 [viders/ucm108519.htm](http://www.fda.gov/Drugs/DrugSafety/PostmarketDrugSafetyInformationforPatientsandProviders/ucm108519.htm).

12  
13  
14 741 37. ——— Newton PN, Fernández FM, Plançon A, et al. A Collaborative Epidemiological  
15  
16 742 Investigation into the Criminal Fake Artesunate Trade in South East Asia. PLoS Med  
17  
18 743 2008;5(2):e32.

19  
20  
21 744 38. ——— Dondorp AM, Newton PN, Mayxay M, et al. Fake antimalarials in Southeast Asia  
22  
23 745 are a major impediment to malaria control: multinational cross-sectional survey on the  
24  
25 746 prevalence of fake antimalarials. Trop Med Int Health 2004;9(12):1241-6.

26  
27  
28 747 39. ——— Khan MH, Okumura J, Sovannarith T, et al. Prevalence of counterfeit  
29  
30 748 anti-helminthic medicines: a cross-sectional survey in Cambodia. Trop Med Int Health 2010  
31  
32 749 May 15(5):639-44. DOI: 10.1111/j.1365-3156.2010.02494.x

33  
34  
35 750 40. ——— Lineberry TW, Bestwick JM. Taking the Physician Out of "Physician Shopping": A  
36  
37 751 Case Series of Clinical Problems Associated With Internet Purchases of Medication. Mayo  
38  
39 752 Clin Proc 2004;79(8):1031-4.

40  
41  
42 753

43  
44  
45 754

46  
47  
48 755

49  
50  
51 756

Formatted: English (U.S.)

1  
2  
3  
4  
5  
6  
7  
8  
9  
10  
11  
12  
13  
14  
15  
16  
17  
18  
19  
20  
21  
22  
23  
24  
25  
26  
27  
28  
29  
30  
31  
32  
33  
34  
35  
36  
37  
38  
39  
40  
41  
42  
43  
44  
45  
46  
47  
48  
49  
50  
51  
52  
53  
54  
55  
56  
57  
58  
59  
60

757

758

For peer review only





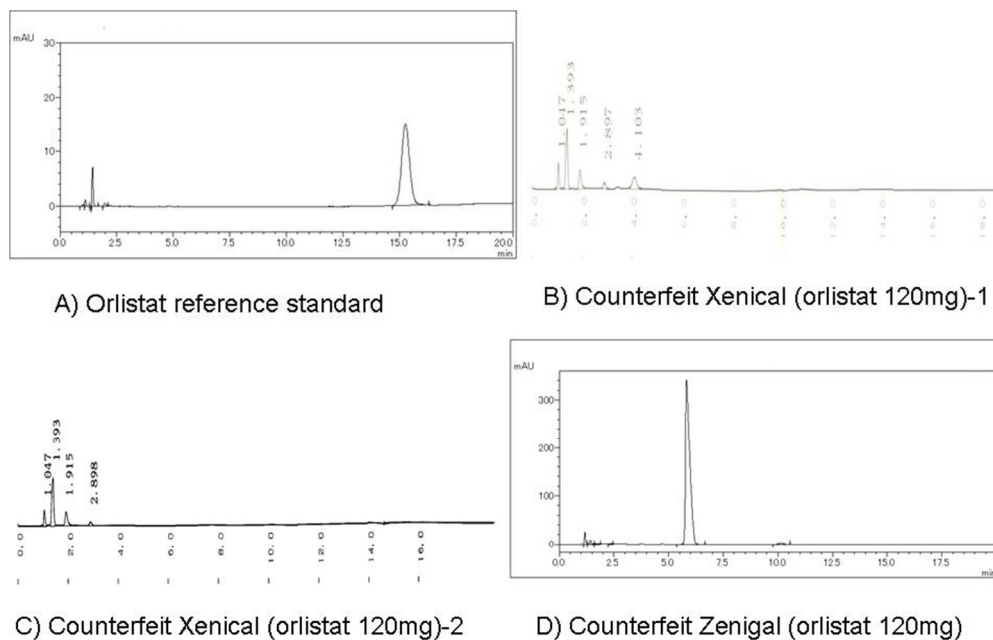

Figure 1: Chromatograms of the reference standard of orlistat and counterfeit samples  
254x190mm (96 x 96 DPI)

ew only

1  
2  
3  
4  
5  
6  
7  
8  
9  
10  
11  
12  
13  
14  
15  
16  
17  
18  
19  
20  
21  
22  
23  
24  
25  
26  
27  
28  
29  
30  
31  
32  
33  
34  
35  
36  
37  
38  
39  
40  
41  
42  
43  
44  
45  
46  
47  
48  
49  
50  
51  
52  
53  
54  
55  
56  
57  
58  
59  
60

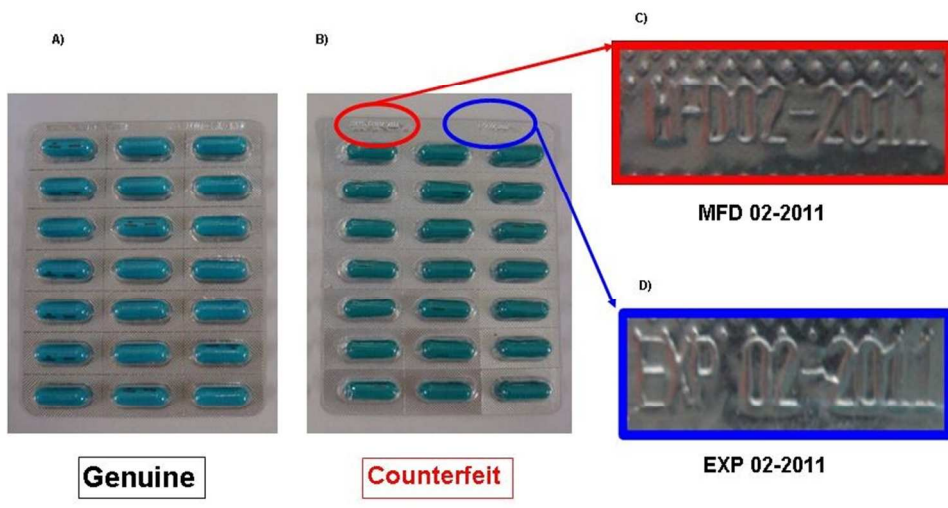

Figure 2. Front of blister: A) Genuine sample, B) Counterfeit sample, C) Manufacturing date of counterfeit sample (MFD 02-2011), D) Expiration date of counterfeit sample (EXP 02-2011)  
254x190mm (96 x 96 DPI)

ew only

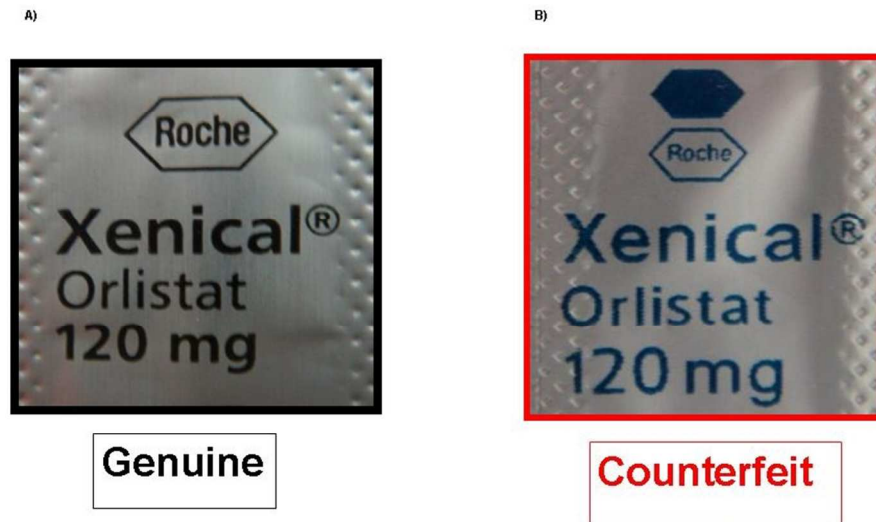

Figure 3. Reverse side of blister: A) Logo of genuine sample, B) Logo of counterfeit sample  
254x190mm (96 x 96 DPI)

STROBE 2007 (v4) Statement—Checklist of items that should be included in reports of *cross-sectional studies*

| Section/Topic                | Item # | Recommendation                                                                                                                                                                       | Reported on page # |
|------------------------------|--------|--------------------------------------------------------------------------------------------------------------------------------------------------------------------------------------|--------------------|
| Title and abstract           | 1      | (a) Indicate the study's design with a commonly used term in the title or the abstract                                                                                               | 1                  |
|                              |        | (b) Provide in the abstract an informative and balanced summary of what was done and what was found                                                                                  | 2-3                |
| <b>Introduction</b>          |        |                                                                                                                                                                                      |                    |
| Background/rationale         | 2      | Explain the scientific background and rationale for the investigation being reported                                                                                                 | 5-6                |
| Objectives                   | 3      | State specific objectives, including any prespecified hypotheses                                                                                                                     | 6                  |
| <b>Methods</b>               |        |                                                                                                                                                                                      |                    |
| Study design                 | 4      | Present key elements of study design early in the paper                                                                                                                              | 7                  |
| Setting                      | 5      | Describe the setting, locations, and relevant dates, including periods of recruitment, exposure, follow-up, and data collection                                                      | 7                  |
| Participants                 | 6      | (a) Give the eligibility criteria, and the sources and methods of selection of participants                                                                                          | 7-8                |
| Variables                    | 7      | Clearly define all outcomes, exposures, predictors, potential confounders, and effect modifiers. Give diagnostic criteria, if applicable                                             | 8-9                |
| Data sources/<br>measurement | 8*     | For each variable of interest, give sources of data and details of methods of assessment (measurement). Describe comparability of assessment methods if there is more than one group | 8                  |
| Bias                         | 9      | Describe any efforts to address potential sources of bias                                                                                                                            | N.A.               |
| Study size                   | 10     | Explain how the study size was arrived at                                                                                                                                            | 7                  |
| Quantitative variables       | 11     | Explain how quantitative variables were handled in the analyses. If applicable, describe which groupings were chosen and why                                                         | 8-10               |
| Statistical methods          | 12     | (a) Describe all statistical methods, including those used to control for confounding                                                                                                | 11                 |
|                              |        | (b) Describe any methods used to examine subgroups and interactions                                                                                                                  | N.A.               |
|                              |        | (c) Explain how missing data were addressed                                                                                                                                          | N.A.               |
|                              |        | (d) If applicable, describe analytical methods taking account of sampling strategy                                                                                                   | N.A.               |
|                              |        | (e) Describe any sensitivity analyses                                                                                                                                                | N.A.               |
| <b>Results</b>               |        |                                                                                                                                                                                      |                    |

|                          |     |                                                                                                                                                                                                              |       |
|--------------------------|-----|--------------------------------------------------------------------------------------------------------------------------------------------------------------------------------------------------------------|-------|
| Participants             | 13* | (a) Report numbers of individuals at each stage of study—eg numbers potentially eligible, examined for eligibility, confirmed eligible, included in the study, completing follow-up, and analysed            | 11-13 |
|                          |     | (b) Give reasons for non-participation at each stage                                                                                                                                                         | 11-13 |
|                          |     | (c) Consider use of a flow diagram                                                                                                                                                                           |       |
| Descriptive data         | 14* | (a) Give characteristics of study participants (eg demographic, clinical, social) and information on exposures and potential confounders                                                                     | 13-14 |
|                          |     | (b) Indicate number of participants with missing data for each variable of interest                                                                                                                          | 13-14 |
| Outcome data             | 15* | Report numbers of outcome events or summary measures                                                                                                                                                         | 14-16 |
| Main results             | 16  | (a) Give unadjusted estimates and, if applicable, confounder-adjusted estimates and their precision (eg, 95% confidence interval). Make clear which confounders were adjusted for and why they were included | N.A.  |
|                          |     | (b) Report category boundaries when continuous variables were categorized                                                                                                                                    | N.A.  |
|                          |     | (c) If relevant, consider translating estimates of relative risk into absolute risk for a meaningful time period                                                                                             | N.A.  |
| Other analyses           | 17  | Report other analyses done—eg analyses of subgroups and interactions, and sensitivity analyses                                                                                                               | 14-16 |
| <b>Discussion</b>        |     |                                                                                                                                                                                                              |       |
| Key results              | 18  | Summarise key results with reference to study objectives                                                                                                                                                     | 17-19 |
| Limitations              | 19  | Discuss limitations of the study, taking into account sources of potential bias or imprecision. Discuss both direction and magnitude of any potential bias                                                   | 19    |
| Interpretation           | 20  | Give a cautious overall interpretation of results considering objectives, limitations, multiplicity of analyses, results from similar studies, and other relevant evidence                                   | 17-19 |
| Generalisability         | 21  | Discuss the generalisability (external validity) of the study results                                                                                                                                        | 19    |
| <b>Other information</b> |     |                                                                                                                                                                                                              |       |
| Funding                  | 22  | Give the source of funding and the role of the funders for the present study and, if applicable, for the original study on which the present article is based                                                | 20    |

\*Give information separately for cases and controls in case-control studies and, if applicable, for exposed and unexposed groups in cohort and cross-sectional studies.

**Note:** An Explanation and Elaboration article discusses each checklist item and gives methodological background and published examples of transparent reporting. The STROBE checklist is best used in conjunction with this article (freely available on the Web sites of PLoS Medicine at <http://www.plosmedicine.org/>, Annals of Internal Medicine at <http://www.annals.org/>, and Epidemiology at <http://www.epidem.com/>). Information on the STROBE Initiative is available at [www.strobe-statement.org](http://www.strobe-statement.org).



**Public health concerns for anti-obesity medicines imported for personal use through the Internet: a cross-sectional study**

|                                 |                                                                                                                                                                                                                                                                                                                                                                                                                             |
|---------------------------------|-----------------------------------------------------------------------------------------------------------------------------------------------------------------------------------------------------------------------------------------------------------------------------------------------------------------------------------------------------------------------------------------------------------------------------|
| Journal:                        | <i>BMJ Open</i>                                                                                                                                                                                                                                                                                                                                                                                                             |
| Manuscript ID:                  | bmjopen-2012-000854.R2                                                                                                                                                                                                                                                                                                                                                                                                      |
| Article Type:                   | Research                                                                                                                                                                                                                                                                                                                                                                                                                    |
| Date Submitted by the Author:   | 05-Apr-2012                                                                                                                                                                                                                                                                                                                                                                                                                 |
| Complete List of Authors:       | Khan, Mohiuddin; Kanazawa University, Drug Management and Policy<br>Tanimoto, Tsuyoshi; Doshisha Women's College,<br>Nakanishi, Yoko; Public Health Center, ; Kanazawa University, Drug<br>Management and Policy<br>Yoshida, Naoko; Kanazawa University, Drug Management and Policy<br>Tsuboi, Hirohito; Kanazawa University, Drug Management and Policy<br>Kimura, Kazuko; Kanazawa University, Drug Management and Policy |
| <b>Primary Subject Heading</b>: | Public health                                                                                                                                                                                                                                                                                                                                                                                                               |
| Secondary Subject Heading:      | Global health, Pharmacology and therapeutics, Nutrition and metabolism                                                                                                                                                                                                                                                                                                                                                      |
| Keywords:                       | PUBLIC HEALTH, NUTRITION & DIETETICS, MEDICAL LAW, Quality in health care < HEALTH SERVICES ADMINISTRATION & MANAGEMENT, Health & safety < HEALTH SERVICES ADMINISTRATION & MANAGEMENT                                                                                                                                                                                                                                      |
|                                 |                                                                                                                                                                                                                                                                                                                                                                                                                             |

SCHOLARONE™  
Manuscripts

Only

1  
2  
3  
4  
5  
6  
7  
8  
9 1 Public health concerns for anti-obesity medicines imported for  
10  
11 2 personal use through the Internet: a cross-sectional study  
12  
13  
14 3 survey

15  
16  
17 4 Mohiuddin Hussain Khan,<sup>1,\*</sup> Tsuyoshi Tanimoto,<sup>2</sup> Yoko Nakanishi,<sup>1,3</sup> Naoko Yoshida,<sup>1</sup> Hirohito  
18  
19 5 Tsuboi,<sup>1</sup> Kazuko Kimura,<sup>1</sup>

20  
21  
22 6 <sup>1</sup> Drug Management and Policy, Kanazawa University, Kanazawa City, Ishikawa, Japan

23  
24 7 <sup>2</sup> Doshisha Women's College, Kyoto, Japan

25  
26  
27 8 <sup>3</sup> Public Health Center, Sainen 3-4-25, Kanazawa city, Ishikawa, Japan

28  
29 9 \* **Corresponding author:** Drug Management and Policy, Kanazawa University, Kakuma-machi,

30  
31  
32 10 Kanazawa City, Ishikawa, Japan 920-1192, Tel./Fax: +81 76 264 6286, E-mail:

33  
34  
35 11 mohiuddin\_khn@yahoo.com

36  
37 12 **Running title:** Quality of online anti-obesity medicines

38  
39  
40 13 **Word counts:** 3,392,088

41  
42 14 **Key Words:** Quality, counterfeit medicine, public health, the Internet, anti-obesity

43  
44  
45 15 medicine

46  
47  
48 16

17 **ABSTRACT**

18 **Objectives:** To explore the circulation of anti-obesity medicines via the Internet and their  
19 quality.

20 **Design:** Cross-sectional study survey.

21 **Setting:** Internet pharmacies and pharmaceutical suppliers accessible from Japan.

22 **Participants:** Anti-obesity medicines were purchased using relevant keywords on Japanese  
23 Google search engine. Blogs and advertisement-only sites were excluded.

24 **Primary and secondary outcome measures:** The authenticity of the samples was investigated  
25 in collaboration with the manufacturers of the samples and medicine regulatory authorities. of  
26 Quality of the samples were performed by pharmacopoeial analyses utilizing high performance  
27 liquid chromatography.

28 **Results:** Eighty-two samples were purchased from 36 internet sites. Approximately half of the  
29 sites did not mention a physical address, and 45% of the samples did not contain a package  
30 insert. A variety of custom declarations were made for the shipments of the samples: personal  
31 health items, supplement, medicines, general merchandise, tea and others. Among 82 samples,  
32 52 samples were analyzed to check their pharmacopoeial quality. Authenticity responses were  
33 received from only five out of 20 manufacturing companies. According to pharmacopoeial  
34 analyses and authenticity investigation, three of the samples were identified as counterfeits and



1  
2  
3  
4  
5  
6  
7  
8  
9 35 did not contain any active ingredients. ~~According to the chemical analyses,~~ Two of these  
10  
11 36 samples were confirmed as counterfeits by the manufacturer of the authentic products. The  
12  
13  
14 37 manufacturer of the other sample did not respond to our request for an authenticity check even  
15  
16  
17 38 after several communication attempts. These counterfeit cases have been reported at the rapid  
18  
19 39 alert system of Western Pacific Region of the World Health Organization.

20  
21  
22 40 **Conclusion:** Many counterfeit and unapproved anti-obesity medicines may be easily bypassing  
23  
24 41 regulatory checks during shipping and are widely circulated through the Internet. Regulatory  
25  
26  
27 42 authorities should take measures to prevent these medicines from entering countries to  
28  
29 43 safeguard their citizens.

30  
31  
32 44

33  
34  
35 45

36  
37  
38 46

39  
40  
41 47

42  
43  
44 48

45  
46  
47 49

48  
49  
50 50

51  
52  
53 51

1  
2  
3  
4  
5  
6  
7  
8  
9 52 **ARTICLE SUMMARY**

10  
11 53 **Article Focus**

- 12  
13  
14 • Quality of online anti-obesity medicines.  
15  
16  
17 55 • Circulation of unapproved anti-obesity medicines via the Internet.  
18

19 56 **Key Messages**

- 20  
21  
22 57 • Counterfeit and substandard anti-obesity medicines, orlistat are identified.  
23  
24 58 • False and vague custom declarations were made by some of the shipping  
25  
26  
27 59 companies to by-pass regulatory checks of unapproved online medicines.  
28

29 60 **Strengths and Limitations**

30  
31  
32 61 Small sample size and low authenticity response rate are limitations of this study.  
33  
34 62 However, the study provides valuable information for regulatory authorities on how  
35  
36  
37 63 unapproved and counterfeit medicines are being circulated through the Internet.  
38  
39  
40 64 Concerted efforts of authentic manufacturers and medicine regulatory authorities are a  
41  
42  
43 65 must to combat counterfeits and ensure access of quality medicines to online consumers.  
44  
45  
46  
47  
48  
49  
50  
51  
52  
53  
54  
55  
56  
57  
58  
59  
60

## 66 INTRODUCTION

67 Over the past decade, the Internet has become an integral part of life for a variety of uses.

68 Approximately 60% of Internet users in some developed countries, such as Japan and United

69 States of America (USA), utilize the Internet for their health related activities, [1-4][1, 2] In fact,

70 when Internet users were asked about specific searches related to health, such as diet and fitness

71 information or health insurance materials, 80% of the users among adult Americans in a 2002

72 survey said that they had performed these types of searches, [1] According to a survey taken in

73 Japan, a majority (86.3%) of the medicines imported for personal use were purchased through

74 the Internet, [5][3] However, according to World Health Organization (WHO), more than 50% of

75 the medicines from Internet sites, which often conceal their physical address, may be counterfeit

76 or of substandard quality, [6][4]

77 WHO defines counterfeit medicines as ones which are deliberately and fraudulently mislabeled

78 with respect to identity and/or source.[7-9] On the other hand, substandard medicines are

79 legitimate ones that do not meet the quality specifications claimed by their manufacturers.[10]

80

81 A number of reports documented the severity of drug counterfeiting during the last two decades.

82 WHO found that 20-90% of drugs were counterfeited in some African countries.[11, 12] In

83 Tanzania, 12.2% of antimalarials were identified as substandard in 2005.[13] In 2009, 37% of

Field Code Changed

Field Code Changed

Field Code Changed

Field Code Changed

1  
2  
3  
4  
5  
6  
7  
8  
9 84 the samples did not meet standards in Nigeria.[14] Similar evidences were also reported in  
10  
11 85 Asia.[15-17] The unprecedented growth of the Internet accompanied with globalization of  
12  
13  
14 86 e-commerce might have worsened the situation further.[18-20]  
15  
16  
17  
18

19 88 Obesity is becoming a major public health epidemic in this century and is associated with an  
20  
21  
22 89 increased risk for a number of health problems, such as hypertension, dyslipidemia, type 2  
23  
24 90 diabetes, and cardiovascular diseases.[21][5] The prevalence of obesity and its associated

Field Code Changed

25  
26  
27 91 conditions are increasingly affecting both developed and developing countries over the last few  
28  
29 92 decades.[22][6] Studies suggest that primarily adolescent and adult males are overweight or  
30  
31 93 obese in Japan.[23][7] Recommended strategies for managing weight and obesity include

Field Code Changed

Field Code Changed

32  
33  
34 94 lifestyle changes with appropriate dietary management and exercise. However, individuals with  
35  
36  
37 95 an isolated  $BMI \geq 30 \text{ kg m}^{-2}$  or a  $BMI > 27 \text{ kg m}^{-2}$  with co-morbidities such as type 2 diabetes,  
38  
39 96 cardiovascular diseases, and obstructive sleep apnea, should receive pharmacotherapy as

Field Code Changed

40  
41  
42 97 well.[24][8] Among the available anti-obesity medicines, phentermine, diethylpropion and  
43  
44  
45 98 orlistat are approved by the U.S. Food and Drug Administration, but sibutramine has been  
46  
47 99 withdrawn from the market.[25, 26][9, 10] Of these anti-obesity medicines, only mazindol has

Field Code Changed

48  
49  
50 100 been approved for use in Japan.[27][11] However, several of these anti-obesity medicines are  
51  
52 101 among those that are frequently imported into Japan for personal use.[28][12] Safety profile.

Field Code Changed

1  
2  
3  
4  
5  
6  
7  
8  
9 102 risk vs benefit, cost-effectiveness of investment deter manufacturers and marketers to get  
10  
11 103 interested in approving anti-obesity medicines for Japanese market.[29]  
12  
13  
14  
15  
16  
17  
18  
19  
20  
21  
22  
23  
24  
25  
26  
27  
28  
29  
30  
31  
32  
33  
34  
35  
36  
37  
38  
39  
40  
41  
42  
43  
44  
45  
46  
47  
48  
49  
50  
51  
52  
53  
54  
55  
56  
57  
58  
59  
60

105 The online purchase of medicine through the Internet is a growing and convenient practice for  
106 many consumers. This practice has also become one of the most popular, easiest and safest  
107 routes for counterfeit medicine traders.[6, 30-32][4, 13-15] The availability of counterfeit  
108 erectile dysfunction (ED) medicines was reported in Japan by a limited number of case  
109 investigations.[33, 34] In addition, a joint investigation done by four pharmaceutical industries  
110 in Japan reported that approximately 60% of ED medicines available in the Internet are  
111 counterfeited.[34] However, the quality of anti-obesity and diet medicines available through the  
112 Internet was still unknown. Since, all types of therapeutic classes of medicines are counterfeited  
113 from essential medicines to lifestyle drugs, Because lifestyle medicines are frequently targeted  
114 by counterfeiters, an collaborative investigation between the Ministry of Health and Labour  
115 Welfare (MHLW), Japan; Kanazawa University, Kanazawa; and Doshisha Women's College,  
116 Kyoto, Japan was conducted to survey the quality of anti-obesity medicines that were purchased  
117 through online medicine sites. This investigation also provided an understanding of the process  
118 by which unapproved medicines are being imported for and used by consumers in Japan.

Field Code Changed

1  
2  
3  
4  
5  
6  
7  
8  
9 12010  
11 12112  
13  
14 122 **METHODS**15  
16  
17 123 **Study design**18  
19 124 Quality of online anti-obesity medicines was assessed using an online cross-sectional  
20  
21  
22 125 ~~study survey~~ during August 2009.  
23

24 126

25  
26  
27 127 **Selection of Internet sites and sample collection**28  
29 128 Internet sites were selected in five steps to purchase anti-obesity medicines. In the first step,30  
31  
32 129 ~~The~~ Japanese keywords personal import agent (個人輸入代行), diet (ダイエット), and33  
34 130 anti-obesity (肥満) medicines were used on the Japanese Google search engine35  
36  
37 131 (www.google.co.jp). From a list of more than 140,000 results, first 500 were further screened38  
39 132 out to find online pharmacies or suppliers or brokers —that offer anti-obesity medicines40  
41  
42 133 provided that they did not mention their physical address in their websites. Websites with43  
44 134 physical address and/or blogs and advertise-only sites were excluded in this step. In the second45  
46  
47 135 through fourth steps, Searches were ~~also~~ made on websites that advertise and sell counterfeit48  
49  
50 136 Cialis (シアルリス), Levitra (レビトラ) and Viagra (バイアグラ). From our experiences on51  
52  
53 137 previous online medicine studies, we presumed that the websites offer counterfeit ED drugs.  
54  
55  
56  
57  
58  
59  
60

1  
2  
3  
4  
5  
6  
7  
8  
9 138 ~~may also offer counterfeits of other varieties of medicines.[5, 35] The physical characteristics of~~  
10  
11 139 ~~original and counterfeit Cialis and Levitra were both identified earlier by the Ministry of Health,~~  
12  
13  
14 140 ~~Japan, and information on websites that sell counterfeit Viagra was provided by Pfizer.[16] As~~  
15  
16  
17 141 ~~such, in the second step, the Japanese key words personal import agent (‘個人輸入代行’),~~  
18  
19 142 ~~Cialis (‘シアリス’), ‘50mg’ and ‘100mg’ were used and first 100 results were~~  
20  
21  
22 143 ~~further screened out from a list of more than 35,000. In the third step, key words personal~~  
23  
24 144 ~~import agent (‘個人輸入代行’), Levitra (‘レビトラ’), ‘50mg’ and ‘100mg’ were~~  
25  
26  
27 145 ~~used and again first 100 results were screened out from a list of around 60,000. The physical~~  
28  
29 146 ~~characteristics (e.g.: color of genuine and counterfeits, strength, packaging etc.) of original and~~  
30  
31  
32 147 ~~counterfeit Cialis and Levitra were both identified earlier by the Ministry of Health, Japan.[33]~~  
33  
34 148 ~~In the fourth step, samples were purchased from nine internet sites where counterfeit Viagra~~  
35  
36  
37 149 ~~(バイアグラ) was offered in the past. The information on these sites was provided by Pfizer.~~  
38  
39  
40 150 ~~Finally, based on the information available from our previous research, we searched~~  
41  
42 151 ~~homepages of ten domestic brokers and four of them were selected for sampling.~~  
43  
44  
45 152

46  
47 153 After the exclusion of blogs and advertisement-only sites, 36 sites were chosen for the purchase  
48  
49  
50 154 of anti-obesity medicines. ~~Some of the criteria used in choosing the sites included the absence~~  
51  
52  
53 155 ~~of a physical address and the presence of suspicious advertisements.~~ A list of  
54  
55  
56  
57  
58  
59  
60

1  
2  
3  
4  
5  
6  
7  
8  
9 156 overweight/anti-obesity medicines was sought on each of the selected sites. ~~Priority rankings~~  
10  
11 ~~were made of the list of Available medicines in the lists were numbered consecutively~~ according  
12  
13  
14 158 to their vertical or horizontal placement on the web pages, ~~excluding foods and drinks items. We~~  
15  
16 159 ~~purchased one anti-obesity medicine that was listed first in one of the selected sites. In the~~  
17  
18  
19 160 ~~subsequent selected websites, we purchased another brand or product of anti-obesity medicines,~~  
20  
21  
22 161 ~~which was listed first. Samples of the anti-obesity medicines were purchased from selected sites~~  
23  
24 162 ~~according to the smallest priority number found for a medicine that had not been purchased~~  
25  
26  
27 163 ~~from a previous website.~~  
28  
29  
30 164

31  
32 165 Information on the site's name, URL, compliance with Japanese rules of "Act on Specified  
33  
34 166 Commercial Transaction" (ASCT), e-mail address, the name of the product and other  
35  
36  
37 167 information such as the dosage, efficacy and side effects, recommendation on consultation with  
38  
39  
40 168 doctors or pharmacists or opportunities for consultation were recorded while examining the sites  
41  
42 169 from which at least one product was purchased. ~~ASCT is the policy guidelines of all kinds of~~  
43  
44 170 ~~business transaction to protect interests of the consumers in Japan. These guidelines cover~~  
45  
46  
47 171 ~~door-to-door sales, mail order sales, telemarketing etc. According to the ASCT all e-commerce~~  
48  
49  
50 172 ~~sites in Japan should mention their name, address(es), telephone numbers, prices of~~  
51  
52  
53 173 ~~commodities, shipment procedure(s) etc.[36]~~  
54  
55  
56  
57  
58  
59  
60



1  
2  
3  
4  
5  
6  
7  
8  
9 174

10  
11 175 **Observational analysis**

12  
13  
14 176 All of the samples were given distinct codes when the shipments were received. The name of  
15  
16  
17 177 the product, dosage form, content information from the printed label, the manufacturers' name  
18  
19 178 and address, the country of origin, the manufacture and expiration dates, lot, registration and  
20  
21  
22 179 license numbers, presence of package insert and their languages, Japanese ~~manual~~,  
23  
24 180 information/notes, information from the shipping company, the sending country, the date of  
25  
26  
27 181 shipment and arrival, and customs declaration notations were recorded for each of the samples.  
28

29 182

30  
31  
32 183 **Chemical analysis**

33  
34 184 Pharmacopoeial procedures for the analysis of the samples (i.e.: orlistat, sibutramine,  
35  
36  
37 185 rimonabant, benfluorex and lovastatin) were established and performed using high performance  
38  
39  
40 186 liquid chromatography (HPLC), which are described briefly below. However, analytical  
41  
42 187 methods and results of rhei rhubarb and herbal products (i.e.: pahyma hoelen, ophiopogonis  
43  
44  
45 188 tuber and dai dai hua) were excluded, since they will be reported elsewhere.  
46

47 189

48  
49 190 Preparation of the sample solutions

50  
51  
52 191 Randomly selected capsules of orlistat and sibutramine samples were weighed accurately. After  
53  
54  
55

1  
2  
3  
4  
5  
6  
7  
8  
9 192 each capsule was weighed, the contents were removed, and the empty capsule shells were  
10  
11 193 subsequently weighed. The difference between the weight of the whole capsule and the capsule  
12  
13  
14 194 shell was assumed to be the weight of the contents. To prepare sample solutions of lovastatin,  
15  
16 benfluorex and rimonabant tablets, randomly chosen tablets were weighed accurately and  
17 195 subsequently crushed separately into powder. Approximately 80 ml of methanol was added to  
18  
19 196  
20  
21 197 the capsule's contents or tablet powder, and the mixture was sonicated for 30 min. After  
22  
23  
24 198 sonication, methanol was then added to a volume of 100 ml. The resulting solutions were  
25  
26  
27 199 filtered through a membrane filter (pore size: 0.45  $\mu\text{m}$ ) and used as the sample solutions.  
28

29  
30 200  
31  
32 201 ~~To prepare sample solutions of lovastatin, benfluorex and rimonabant tablets, randomly chosen~~  
33  
34 202 ~~tablets were weighed accurately and subsequently crushed separately into powder.~~  
35  
36  
37 203 ~~Approximately 80 ml of methanol was added to the powder, and the solutions were sonicated~~  
38  
39 204 ~~for 30 min. Methanol was added to each of the solutions to a volume of 100 ml. The resulting~~  
40  
41  
42 205 ~~solutions were filtered through membrane filters (pore size: 0.45  $\mu\text{m}$ ) and used as the sample~~  
43  
44  
45 206 ~~solutions.~~  
46

47 207

48  
49  
50 208 Preparation of standard solutions

51  
52 209 Three consecutive strengths of standard solutions were prepared by dissolving 0.375 mg, 0.75  
53  
54  
55

1  
2  
3  
4  
5  
6  
7  
8  
9 210 mg and 1.50 mg of orlistat; 0.050 mg, 0.100 mg and 0.200 mg of sibutramine; 0.100 mg, 0.200

10  
11 211 mg and 0.500 mg of lovastatin; 0.100 mg, 1.50 mg and 2.00 mg of benfluorex; 0.100 mg, 0.200

12  
13  
14 212 mg and 0.500 mg of rimonabant in 1 ml of methanol for each solution.

15  
16  
17 213

18  
19 214 Assay condition

20  
21 215 Ten microliters of each sample solution and standard solution was placed in vials and assayed

22  
23 216 using a photodiode array of 225 nm wavelength (200–400 nm range for spectra) with a stainless

24  
25  
26 217 steel column with a 4.6 mm internal diameter and 15 cm length packed with octadecylsilanized

27  
28 218 silica gel for liquid chromatography (5 µm particle diameter) used with Mightysil RP-18 GP

29  
30 219 150-4.6. The column temperature was maintained at 45°C. A mixture of methanol and phosphate

31  
32 220 buffer, pH 7.0 (17:3) was used as the mobile phase at a flow rate of 1.2 ml/min.

33  
34  
35  
36  
37 221

38  
39 222 **Authenticity investigation**

40  
41 223 A catalogue and a questionnaire for all the samples were created that included the information

42  
43 224 from the printed labels of the product packages. The printed information was also checked

44  
45 225 against the information on the manufacturers' websites. The questionnaires were sent to the

46  
47 226 appropriate manufacturers with a portion of the samples for verification of their authenticity.

48  
49  
50 227 The regulatory authorities for medicine in the country of origin were also contacted to verify the

1  
2  
3  
4  
5  
6  
7  
8  
9 228 legitimacy of the products and their approval for marketing. After considering the WHO  
10  
11 229 definition of counterfeit medicines, the gathered information was analyzed to determine the  
12  
13  
14 230 authenticity of the individual samples and their manufacturers. ~~[7, 37][17, 18]~~

Field Code Changed

15  
16  
17 231

### 18 19 232 **Statistical analysis**

20  
21 233 Because of the small size of the sample, descriptive statistical analysis was performed using  
22  
23  
24 234 Microsoft Excel.

25  
26  
27 235

## 28 29 236 **RESULTS**

30  
31  
32 237 ~~A total of 82 samples from 31 varieties of anti-obesity products were purchased from 36 internet~~  
33  
34 238 ~~sites. Some of these products were shipped in divided shipments and treated as distinct samples.~~

35  
36  
37 239 ~~In the first step of the Internet search, Of the selected internet sites, 15 sites were selected that~~  
38  
39 240 ~~did not show a physical address. In the second through fourth steps, and six, two and nine of~~  
40  
41  
42 241 ~~the web sites were selected that concurrently~~ advertised counterfeit Cialis, Levitra and Viagra,  
43  
44 242 ~~respectively. Two of the sites with fake Cialis and Viagra also did not show a physical address.~~

45  
46  
47 243 ~~Four of the websites were hosted by domestic shipping companies selected in the fifth step. A~~  
48  
49 244 ~~total of 82 samples from 31 varieties of anti-obesity products were purchased from 36 internet~~  
50  
51  
52 245 ~~sites (Table 1). On average, these sites offered 62 kinds of products (including diet foods and~~

drinks). Some of these products were shipped in divided shipments and treated as distinct samples. However, only one of such identical samples was analyzed for pharmacopoeial quality.

Table 1. Active Ingredient

| Active Ingredient               | Approval status in Japan | n(%)              | Classification                                |
|---------------------------------|--------------------------|-------------------|-----------------------------------------------|
| Sibutramine hydrochloride       | Not approved             | 42 (51.2)         | Prescription medicine                         |
| Orlistat                        | Not approved             | 15 (18.3)         | Prescription medicine<br>Over the counter: 5* |
| Rimonabant                      | Not approved             | 2 (2.4)           | Prescription medicine                         |
| Benfluorex                      | Not approved             | 2 (2.4)           | Prescription medicine                         |
| Lovastatin**                    | Not approved             | 2 (2.4)           | Prescription medicine                         |
| <i>Pachyma hoelen</i> (茯苓)      | Approved                 | 14 (17.1)         | Over the counter                              |
| <i>Ophiopogonis tuber</i> (麦門冬) | Approved                 | 3 (3.6)           | Over the counter                              |
| <i>Rhei</i> Rhubarb (大黄)**      | Approved                 | 1 (1.2)           | Over the counter                              |
| Dai dai hua (代代花)               | Approved                 | 1 (1.2)           | Over the counter                              |
| <b>Total</b>                    |                          | <b>82 (100.0)</b> |                                               |

\*: Alli (orlistat 60 mg), \*\*: available under diet (ダイエット) search/ not classified as anti-obesity medicines

### Information available on the web sites

Different levels of compliance with ASCT were observed throughout all (36) of the web sites.<sup>[36]</sup> For instance, all (100%) of them mentioned the selling price, shipping charges for the goods, and methods of payment. However, only 21 (58.3%) of them provided telephone numbers, and only 17 (47.2%) of them mentioned a physical address.

1  
2  
3  
4  
5  
6  
7  
8  
9 259 Information for e-mail addresses and shipment procedures were presented on all of the selected  
10  
11 260 sites. However, only 21 (58.3%) of them encouraged consumers to consult with a physician or  
12  
13  
14 261 pharmacist. Consultation services were available at two (5.5%) of the sites. Dosage and  
15  
16 262 administration, effects and efficacy, and side effects related to the products were explained in 18  
17  
18  
19 263 (50%), 23 (63.8%) and 17 (47.2%) of the sites, respectively, despite the prohibition on  
20  
21  
22 264 advertisements for unapproved medicines.  
23  
24  
25  
26  
27 265

#### 27 266 **Information provided with the samples**

28  
29 267 Upon examination of the printed materials, the languages of the package inserts were found to  
30  
31  
32 268 be in English for 14 (17.1%) of the samples, Chinese for 13 (15.9%), both Chinese and Korean  
33  
34 269 for 10 (12.2%), both English and Chinese for 4 (4.9%), Turkish for 2 (2.4%), both English and  
35  
36  
37 270 Thai for 1 (1.2%), and English, Chinese and Russian for 1 (1.2%) of the samples. However, 37  
38  
39 271 ~~(45.1% (37))~~ of the samples did not have any package inserts.  
40  
41  
42 272  
43  
44  
45 273

#### 47 274 **Shipment of the samples**

48  
49  
50 275 Samples were sent by 29 different shipping companies. The majority (13 companies) shipped  
51  
52  
53 276 from China, and the second largest group was from India (4 companies). Others were shipped  
54  
55  
56  
57  
58  
59  
60

1  
2  
3  
4  
5  
6  
7  
8  
9 277 from the USA (3), Japan (2), Thailand (2), Switzerland (1), Hong Kong (1), Cambodia (1), the  
10  
11 278 Fiji Islands (1), and Puerto Rico (1). The customs declaration was 'health product/personal  
12  
13  
14 279 health items' for 20 (24.4%) of the samples, 'supplement' for 13 (15.9%) of the samples,  
15  
16  
17 280 'medicine' for 10 (12.2%) of the samples and the actual name of the product in 2 (2.4%) cases.  
18  
19 281 However, 12 (14.7%) of the samples were shipped with a declaration of general merchandise  
20  
21 282 and/or tea, 11 (13.4%) of them declared 'other' and 14 (17.1%) of them did not mention  
22  
23  
24 283 anything as the declaration. Interestingly, one representative from an importing agent of a diet  
25  
26  
27 284 medicine clinic (Sabairato Yanhee MD and clinic, <http://www.gop23.com>) inquired over the  
28  
29 285 telephone regarding the purpose for our purchase of the medicine and asked if we had any  
30  
31  
32 286 relationship with the MHLW, Japan; they did not sell their products to us.  
33  
34  
35 287

### 288 **Sample characteristics**

36  
37  
38  
39 289 Of the 82 samples, ~~423~~ (512.24%) were advertised on the websites as containing sibutramine  
40  
41  
42 290 hydrochloride and 15 (18.3%) were advertised as orlistat. Rimonabant, benfluorex, and  
43  
44  
45 291 lovastatin were advertised to be in two (2.4%) of the samples. Rhei rhubarb was said to be in  
46  
47  
48 292 one, and the remaining ~~187~~ (210.97%) samples were advertised to be herbal products (Table 1).  
49  
50 293 ~~All these products were advertised by their brand names. The results of the rhubarb and herbal~~  
51  
52  
53 294 ~~products will be reported elsewhere.~~ Out of the 64 synthetic products, 58 samples from 19  
54  
55  
56  
57  
58  
59  
60

1  
2  
3  
4  
5  
6  
7  
8  
9 295 different products were prescription medicines, however, none of which requested a prescription  
10  
11 296 for the purchase. Five brands of orlistat were over-the-counter medicines, and one sample,  
12  
13  
14 297 Daidai hua, was marketed as a natural supplement. Interestingly, daidai hua ~~However, this~~  
15  
16 298 ~~product~~ was advertised as sibutramine by its agent, and the sample actually contained  
17  
18  
19 299 sibutramine as shown by chemical analysis. According to purported country of marketing  
20  
21 300 authorization holder, 25 sibutramine products originated from India (dispatched from India,  
22  
23 301 Hong Kong and Fiji Islands), seven from China (dispatched from China), seven from Germany  
24  
25 302 (dispatched from Hong Kong and Cambodia) and three from Hong Kong (dispatched from  
26  
27 303 Cambodia). Among 15 orlistat products, seven originated from India (dispatched from India and  
28  
29 304 Japan), five from United Kingdom (dispatched from Switzerland, USA and Japan), two from  
30  
31 305 Switzerland (dispatched from Puerto Rico) and one from Thailand (dispatched from Thailand).  
32  
33 306 Two rimonabant, benfluorex and one lovastatin samples originated from India (dispatched from  
34  
35 307 Thailand and Japan), France (dispatched from Hong Kong) and USA (dispatched from USA)  
36  
37 308 respectively. All herbal products (including daidai hua) originated from China, except two (i.e.:  
38  
39 309 Pachyma hoelen), which are from USA, however, dispatched from China.  
40  
41  
42  
43  
44  
45  
46  
47  
48  
49  
50  
51

52 312 **Quality analysis**



1  
2  
3  
4  
5  
6  
7  
8  
9 313 Out of total, 52 samples (i.e.: Sibutramine: 21, Orlistat: 13, Rimonabant: 2, Benfluorex: 2,  
10  
11 314 Lovastatin: 1 and herbal products: 13) were analyzed by HPLC to measure quantity of active  
12  
13  
14 315 ingredients in the samples. Thirty samples (received in divided shipments and identical with an  
15  
16 316 analyzed sample from a same source respectively) were excluded because of the insufficient  
17  
18  
19 317 materials. Quantitative analysis by HPLC showed that all (21) of the samples of sibutramine  
20  
21  
22 318 were in the acceptable range (90%-110%) except one (mean content percentage of 60.2±7.6).  
23  
24 319 No active ingredient was detected in three out of the 13 samples of orlistat that we tested  
25  
26  
27 320 (Figure 1). These three samples were identified to be counterfeit. Of these three counterfeit  
28  
29 321 samples, two were found to be Xenical after analysis by the researchers and the manufacturer of  
30  
31 322 the genuine products. No active ingredient was detected in the last sample, only starch (Figure  
32  
33 323 1). The other counterfeit sample contained unknown excipients. None of the samples of  
34  
35 324 lovastatin, benfluorex or rimonabant failed the HPLC analysis.  
36  
37  
38  
39 325  
40  
41

#### 42 326 **Authenticity investigation**

43  
44  
45 327 Responses to our requests for authentication were received from only five of the 20  
46  
47 328 manufacturing companies of the genuine samples. According to the responses that we received,  
48  
49  
50 329 all of the responding manufacturers were GMP compliant. Of the 12 reported samples, two of  
51  
52 330 the orlistat samples (Xenical) from the same manufacturer were confirmed to be counterfeit  
53  
54  
55  
56  
57  
58  
59  
60

331 (Table 24).

332

333

334

335 Table 24. Results of Authenticity Investigation

| Active ingredient   | <del>Labeled c</del> Country of<br><del>Authorized m</del> Marketing<br><del>authorization holder</del> | Genuine<br>sample | Counterfeit<br>sample | Manufacturing<br>License |
|---------------------|---------------------------------------------------------------------------------------------------------|-------------------|-----------------------|--------------------------|
| Orlistat (60 mg)    | USA                                                                                                     | 5                 | 0                     | YES                      |
| Benfluorex (150 mg) | France                                                                                                  | 2                 | 0                     | YES                      |
| Rimonabant (20 mg)  | India                                                                                                   | 1                 | 0                     | YES                      |
| Orlistat (120 mg)   | Switzerland                                                                                             | 1                 | 2                     | YES                      |
| Rhei Rhubarb        | China                                                                                                   | 1                 | 0                     | YES                      |
| *Orlistat (120 mg)  | India                                                                                                   | 0                 | 1                     | Unknown                  |

336 \* labeled manufacturer did not reply

337

338 The counterfeit samples were purchased at [www.kenkoclinic.com](http://www.kenkoclinic.com) and sent to us from Puerto

339 Rico. They bore the same manufacture and expiration dates (MFD: 02/2011 and EXP: 02/2011,

1  
2  
3  
4  
5  
6  
7  
8  
9 340 Figure 2) on their blisters, which had not yet occurred at the time of our investigation. The  
10  
11 341 printed information on the blisters of the counterfeits was a different color with a similar but  
12  
13  
14 342 slightly different logo (Figure 3).  
15

16  
17 343

18  
19 344 Telephone communications were made to the manufacturer of Zenigal (orlistat 120 mg) in India,  
20  
21 345 which did not contain any of the active ingredients that had been claimed on the product labels.  
22  
23  
24 346 However, the manufacturer did not respond after several communication attempts. This  
25  
26  
27 347 counterfeit Zenigal sample was sent to us from Japan. We reported these three cases of  
28  
29 348 counterfeit medicines at the rapid alert system of the Western Pacific Region of the World  
30  
31  
32 349 Health Organization.  
33

34  
35 350

36  
37 351 Responses were received from the medical regulatory authorities of three countries (Germany,  
38  
39 352 Switzerland and USA) for five of the manufacturers. Their responses stated that only orlistat has  
40  
41  
42 353 approval to be manufactured in Switzerland. Approval for the manufacture of sibutramine in  
43  
44  
45 354 Germany was suspended in January 2010, and it was not approved for use in the USA.  
46

47  
48 355

## 49 50 356 **DISCUSSION**

### 51 52 357 **Provided information on the samples**

53  
54  
55  
56  
57  
58  
59  
60

1  
2  
3  
4  
5  
6  
7  
8  
9 358 According to the Pharmaceutical Affairs Law (PAL) in Japan, advertising of unapproved  
10  
11 359 medicines is prohibited, and Customs should seize any shipment of prescription medicines when  
12  
13 360 the amount exceeds more than a one-month dose or any non-prescription medicines that exceed  
14  
15 361 more than a two-month dose. However, at least some of the samples in this study that exceeded  
16  
17 362 the approved amount for shipment made it through the regulatory checks during  
18  
19 363 shipping.<sup>[38][19]</sup> Surprisingly, at least four of the shipping companies are conducting business  
20  
21 364 in Japan. Contact information was not provided on many of the sites (52.8%), which seemingly  
22  
23 365 contradicts ASCT.<sup>[36][20]</sup> According to our study, nearly fifty percent of the sites mentioned  
24  
25 366 dosage administration, effects or side-effects of the medicines, which are not permitted by the  
26  
27 367 ~~pharmaceutical affairs laws (PAL)~~ in Japan.<sup>[38][19]</sup> As found in many previous studies on  
28  
29 368 e-medicines, approximately 50% of the samples did not contain a package insert.<sup>[35,</sup>  
30  
31 369 <sup>39-42][21-25]</sup> Moreover, several of the weight-loss products may contain harmful or  
32  
33 370 contraindicated ingredients.<sup>[33, 39][16, 21]</sup> ~~Similar to the findings of a recent study, none of the~~  
34  
35 371 ~~websites of our study required a prescription to purchase medicines.~~<sup>[43, 44]</sup>  
36  
37  
38  
39  
40  
41  
42  
43  
44  
45 372

### 373 Approval status of the products

374 The majority of the study samples were sibutramine, which is a selective inhibitor of the central  
375 neuronal reuptake of serotonin and noradrenaline and reduces food intake and body

Field Code Changed

Field Code Changed

Field Code Changed

1  
2  
3  
4  
5  
6  
7  
8  
9 376 weight,<sup>[45][26]</sup> However, after conclusion of the safety review of sibutramine, the European  
10  
11 377 Medicines Agency (EMA) has suspended its marketing authorization in the European Union  
12  
13 378 (EU),<sup>[46][27]</sup> A recently published study reported that generic Figurer (sibutramine 10 mg),  
14  
15  
16 379 even though it has not been reviewed by the responsible government (USA, the exporting  
17  
18 380 nation), is freely circulating via the Internet, which is a serious concern for public  
19  
20  
21 381 health,<sup>[35][22]</sup> According to the medicine regulations of Hong Kong, Figurer does not need  
22  
23  
24 382 manufacturing authorization because the medicine is manufactured in a foreign country. The  
25  
26  
27 383 authorization status of Ali (orlistat 60 mg) as a prescription medicine has been recommended to  
28  
29 384 transition to a non-prescription medicine in the EU,<sup>[47][28]</sup> In a questionnaire conducted by  
30  
31  
32 385 community pharmacists in Great Britain, orlistat is suspected to be misused by consumers, as  
33  
34 386 stated in their responses,<sup>[48][29]</sup> Similarly, marketing authorization for Acomplia (rimonabant)  
35  
36  
37 387 has also been withdrawn in the EU in January 2009 and safety profiles of other anti-obesity  
38  
39 388 agents are generating controversy in different parts of the world,<sup>[49-53][30-33]</sup> Even though all  
40  
41  
42 389 the anti-obesity agents sampled in this survey are unapproved in Japan, it is possible that anyone  
43  
44  
45 390 can procure these items without declaring the actual contents during shipping.  
46  
47  
48 391  
49  
50 392 **Authenticity and quality of the samples**  
51  
52 393 As similarly shown in previous studies, we observed low rates of authenticity,<sup>[54][34]</sup>

Field Code Changed

394 Responses from only five (25%) of the manufacturers for 14.6% of the samples were received.

395 The counterfeit samples identified in this survey were confirmed by the manufacturer of the

396 corresponding genuine products. Counterfeiting of anti-obesity medicines, particularly orlistat,

397 has been previously reported.<sup>[55, 56]</sup>~~[35, 36]~~ Based on the external characteristics of the

398 counterfeits, these products most often differ in their printed information, design, color, etc.

399 from those of the genuine drugs.<sup>[17, 57]</sup>~~[37, 38]~~ As shown in some other studies, the

400 counterfeits detected in this survey did not contain any active ingredients.<sup>[54, 58]</sup>~~[34, 39]~~ It is

401 not clear why the manufacture of Zenigal, which failed the content analysis, did not respond to

402 our authentication request. In such a case, it can be assumed that the manufacturer is already

403 aware of the distribution of low-quality products in the pharmaceutical market. Several reports

404 suggest that patients have sought medical treatment for life-threatening complications after the

405 consumption of fake or substandard medicines purchased online.<sup>[59]</sup>~~[49]~~ When products are

406 purchased through the Internet and the sites are not sufficiently regulated, customers are left to

407 accept the consequences.

408

409 ~~According to the PAI, a person violating pharmaceutical regulation may be sentenced to an~~

410 ~~imprisonment of up to 3 years or imposed a penalty of up to JPY 3 million or both.<sup>[60]</sup> In case~~

411 ~~of such violation by a company, the penalty may be increased to a maximum JPY 100~~

Field Code Changed

Field Code Changed

Field Code Changed

Field Code Changed

Formatted: Font: Not Bold

1  
2  
3  
4  
5  
6  
7  
8  
9 412 million.[60] Nevertheless, PAL has only jurisdiction to regulate domestic traders and has no  
10  
11  
12 413 hold on foreign online traders. Strengthening international collaboration along with  
13  
14 414 public-private partnership initiatives may facilitate stemming out illegal internet trading hosted  
15  
16  
17 415 from outside national boundaries.[19, 61, 62]  
18  
19  
20 416

21  
22 417 One of the limitations of the study might be small sample size, which may restrict study  
23  
24 418 findings to Japan. The sampling scheme may also limit our findings from generalization to all  
25  
26  
27 419 internet sites. However, the sampling scheme was purposefully designed to investigate  
28  
29  
30 420 suspicious online medicine sites. Our study was not designed comprehensively to explore  
31  
32 421 information during shipment of medicinal products especially at Japanese custom check.  
33

34 422 Further evaluation with a representative sample may provide more information on the extent of  
35  
36  
37 423 the problem. Low response rate of authenticity investigation may also be considered as a  
38  
39  
40 424 limiting factor. However, better communication and cooperation among authentic manufacturers  
41  
42  
43 425 and medicine regulatory authorities may increase response rate and generate more information  
44  
45  
46 426 to counteract against counterfeits.

47 427

## 48 49 50 428 **CONCLUSIONS**

51  
52 429 It is evident from this study that counterfeit, unapproved and suspended anti-obesity medicines  
53  
54  
55

1  
2  
3  
4  
5  
6  
7  
8  
9 430 are circulating via the Internet. Because of gaps and the insufficient monitoring system of  
10  
11 431 imports for personal use in the rapidly growing e-commerce environment, these medicines can  
12  
13  
14 432 easily enter into the distribution channels for pharmaceuticals and may pose health hazards for  
15  
16 433 consumers. Time has come to address such gaps of cross-border pharmaceutical e-commerce  
17  
18  
19 434 and regulate the same through international cooperation and public-private partnerships.  
20  
21 435 Obviously, first and foremost step should be at country levels to make necessary amendments of  
22  
23 436 existing regulation focusing online pharmaceutical transactions. Furthermore, there might be an  
24  
25 437 urgent need at international level to formulate common regulation and agreements focusing  
26  
27 438 issues of pharmaceutical e-commerce.  
28  
29  
30  
31  
32 439 -  
33  
34  
35 440  
36

37 441 **Acknowledgements** We gratefully acknowledge the cooperation received from the staff of  
38  
39 442 MHLW. ~~Additionally, we thank Ms. Hitomi Tabata for her cooperation in this work.~~  
40  
41  
42 443  
43  
44 444 **Funding** This study was supported by ~~Health and Labour Sciences~~ Research Grants from the  
45  
46 445 MHLW, Japan.  
47  
48  
49  
50 446  
51

52 447 **Competing interests** The authors declare no conflict of interest.  
53  
54  
55  
56  
57  
58  
59  
60



1  
2  
3  
4  
5  
6  
7  
8  
9 44810  
11 449

12  
13  
14 450 **Authors' contribution** MHK, TT, YN, and KK participated in the conception and design of the  
15  
16 451 study; TT, YN and KK participated in sampling activities and analysis of the samples; MHK, TT,  
17  
18 452 YN, NY, HT and KK participated in data analysis and interpretation of results. MHK wrote the  
19  
20 453 first draft of the manuscript. All authors contributed in the critical review of the draft manuscript,  
21  
22 454 editing and finally approved its submitted version.  
23  
24  
25

26 455

27  
28  
29 456

30  
31  
32 457 **Data sharing statement** No additional data available.  
33  
34

35 458  
36  
37  
38  
39  
40  
41  
42  
43  
44  
45  
46  
47  
48  
49  
50  
51  
52  
53  
54  
55  
56  
57  
58  
59  
60

## 459 REFERENCES

- 460 1. [Madden M. America's Online Pursuits: The changing picture of who's online and](#)  
461 [what they do. Washington D. C.: Pew Internet 2003 22 December 2003.](#)
- 462 2. [Atkinson NL, Saperstein SL, Pleis J. Using the Internet for Health-Related](#)  
463 [Activities: Findings From a National Probability Sample. J Med Internet Res 2009;11\(1\):e4.](#)
- 464 3. [Askola K, Atsushi T, Huotari M-L. Cultural Differences in the Health Information](#)  
465 [Environments and Practices between Finnish and Japanese University Students.](#)  
466 [Information Research 2010;15\(4\):paper 451.](#)
- 467 4. [Takahashi Y, Ohura T, Ishizaki T, et al. Internet Use for Health-Related](#)  
468 [Information via Personal Computers and Cell Phones in Japan: A Cross-Sectional](#)  
469 [Population-Based Survey. J Med Internet Res 2011;13\(4\):e110.](#)
- 470 5. [Araki R, Okumura J, Akazawa M, et al. A survey on the awareness of consumers on](#)  
471 [their personal import of medicines from public health view point. Japanese Journal of Social](#)  
472 [Pharmacy 2010;28\(3\):134-5.](#)
- 473 6. [WHO. Medicines: counterfeit medicines. Geneva: World Health Organization;](#)  
474 [2010 \[cited 8 March 2010\]; Fact sheet No. 275\]. Available from:](#)  
475 <http://www.who.int/mediacentre/factsheets/fs275/en/index.html>.
- 476 7. [WHO. Counterfeit Drugs: Guidelines for the development of measures to combat](#)

Formatted: Indent: Left: 0", First line: 0",  
Line spacing: Double

Formatted: Font: Century, 10 pt

Formatted: Font: Century, 10 pt, Swedish  
(Sweden)

Formatted: Font: Century, 10 pt

Formatted: Font: Century, 10 pt, French  
(France)

Formatted: Font: Century, 10 pt

Formatted: Hyperlink, Font: Century, 10 pt

Formatted: Font: Century, 10 pt

- 1  
2  
3  
4  
5  
6  
7  
8  
9 477 [counterfeit drugs Geneva, Switzerland: Department of Essential Drugs and Other](#)
- 10  
11 478 [Medicines. World Health Organization 1999. Report No.: \(WHO/EDM/QSM/99.1\).](#)
- 12  
13  
14 479 [8. WHO. General information on counterfeit medicines. Geneva: World Health](#)
- 15  
16  
17 480 [Organization; 2009 \[cited May 27 2009\]; Available from:](#)
- 18  
19 481 <http://www.who.int/medicines/services/counterfeit/overview/en/>.
- 20  
21  
22 482 [9. IMPACT. Principles and Elements for National Legislation against Counterfeit](#)
- 23  
24 483 [Medical products: Text endorsed by IMPACT General Meeting. Lisbon: International](#)
- 25  
26  
27 484 [Medical Products Anti-Counterfeiting Taskforce 2007 12 December 2007.](#)
- 28  
29 485 [10. WHO. What are substandard drugs? Geneva: World Health Organization; 2009](#)
- 30  
31  
32 486 [\[cited July 15 2009\]; Available from:](#)
- 33  
34 487 <http://www.who.int/medicines/services/counterfeit/faqs/06/en/index.html>.
- 35  
36  
37 488 [11. Surendran A. World agencies try to stem flood of fake drugs. Nat Med 2004 Feb](#)
- 38  
39 489 [2004;10\(2\):111.](#)
- 40  
41  
42 490 [12. Kelesidis T, Kelesidis I, Rafailidis PI, et al. Counterfeit or substandard](#)
- 43  
44 491 [antimicrobial drugs: a review of the scientific evidence. J Antimicrob Chemother 2007](#)
- 45  
46 492 [August 1, 2007;60\(2\):214-36.](#)
- 47  
48  
49 493 [13. Kaur H, Goodman C, Thompson E, et al. A nationwide survey of the quality of](#)
- 50  
51  
52 494 [antimalarials in retail outlets in Tanzania. PLoS One 2008;3:e3403.](#)
- 53  
54  
55  
56  
57  
58  
59  
60

Formatted: Hyperlink, Font: Century, 10 pt

Formatted: Font: Century, 10 pt

Formatted: Hyperlink, Font: Century, 10 pt

Formatted: Font: Century, 10 pt

Formatted: Font: Century, 10 pt, Norwegian (Bokmål)

Formatted: Font: Century, 10 pt

Formatted: Font: Century, 10 pt, Portuguese (Brazil)

- 1  
2  
3  
4  
5  
6  
7  
8  
9 495 14. Onwujekwe O, Kaur H, Dike N, et al. Quality of anti-malarial drugs provided by  
10  
11 496 public and private healthcare providers in south-east Nigeria. Malar J 2009;8(1):22.  
12  
13  
14 497 15. Newton PN, Green MD, Fernández FM, et al. Counterfeit anti-infective drugs.  
15  
16 Lancet Infect Dis. [Review]. 2006 September 2006;6(9):602-13.  
17 498  
18  
19 499 16. Khan AY, Ghilzai NMK. Counterfeit and substandard quality of drugs: The need  
20  
21 for an effective and stringent regulatory control in India and other developing countries.  
22 500  
23 Indian J Pharmacol. [Research Letter]. 2007;39(4):206-7.  
24 501  
25  
26 502 17. Newton PN, Fernández FM, Plançon A, et al. A Collaborative Epidemiological  
27  
28 Investigation into the Criminal Fake Artesunate Trade in South East Asia. PLoS Med  
29 503  
30 2008;5(2):e32.  
31 504  
32  
33 505 18. Liang BA, Mackey T. Searching for Safety: Addressing Search Engine, Website,  
34  
35 and Provider Accountability for Illicit Online Drug Sales. American Journal of Law &  
36 506  
37 Medicine 2009;35 (2009):125-84.  
38 507  
39  
40 508 19. Mackey TK, Liang BA. The global counterfeit drug trade: Patient safety and public  
41  
42 health risks. J Pharm Sci 2011;100(11):4571-9.  
43 509  
44  
45 510 20. Letkiewicz S, Górski A. The Potential Dual Use of Online Pharmacies. Science and  
46  
47 Engineering Ethics 2010;16(1):59-75.  
48 511  
49  
50 512 21. WHO. 2008-2013 Action Plan for the Global Strategy for the Prevention and  
51  
52  
53  
54  
55  
56  
57  
58  
59  
60

Formatted: Font: Century, 10 pt

- 1  
2  
3  
4  
5  
6  
7  
8  
9 513 [Control of Noncommunicable Diseases. Organization WH, editor. Geneva: World Health](#)  
10  
11 514 [Organization; 2008.](#)  
12  
13  
14 515 [22. James WPT. The epidemiology of obesity: the size of the problem. Blackwell](#)  
15  
16 516 [Publishing Ltd; 2008. p. 336-52.](#)  
17  
18  
19 517 [23. Moreno LA, Pigeot I, Ahrens W, et al. Prevalence of Overweight and Obesity in](#)  
20  
21 518 [Japan. Epidemiology of Obesity in Children and Adolescents: Springer New York; 2011. p.](#)  
22  
23 519 [153-62.](#)  
24  
25  
26 520 [24. Snow V, Barry P, Fitterman N, et al. Pharmacologic and Surgical Management of](#)  
27  
28 521 [Obesity in Primary Care: A Clinical Practice Guideline from the American College of](#)  
29  
30 522 [Physicians. Ann Intern Med 2005 April 5, 2005;142\(7\):525-31.](#)  
31  
32  
33 523 [25. Lowes R, Waknine Y. FDA Announces Sibutramine Has Been Withdrawn From the](#)  
34  
35 524 [Market. Medscape Education \[serial on the Internet\]. 2010 \[cited 2011 25 October\]:](#)  
36  
37 525 [Available from: http://www.medscape.org/viewarticle/730515.](#)  
38  
39  
40 526 [26. FDA. FDA Drug Safety Communication: FDA Recommends Against the Continued](#)  
41  
42 527 [Use of Meridia \(sibutramine\). Rockville, MD 2010 \[updated 8 October 2010; cited 25](#)  
43  
44 528 [October 2011.\]; Available from: http://www.fda.gov/Drugs/DrugSafety/ucm228746.htm.](#)  
45  
46  
47 529 [27. MHLW. Authorization status of drugs in Japan. Tokyo: Ministry of Health and](#)  
48  
49 530 [Labour Welfare; 2011 \[cited June 30 2011\]; Available from:](#)  
50  
51  
52  
53  
54  
55  
56  
57  
58  
59  
60

Formatted: Hyperlink, Font: Century, 10 pt

Formatted: Font: Century, 10 pt

Formatted: Hyperlink, Font: Century, 10 pt

Formatted: Font: Century, 10 pt

531 [http://www.info.pmda.go.jp/psearch/html/menu\\_tenpu\\_base.html](http://www.info.pmda.go.jp/psearch/html/menu_tenpu_base.html).

Formatted: Hyperlink, Font: Century, 10 pt

Formatted: Font: Century, 10 pt

532 28. [Tsuji K, Tsutani K. Personal imports of drugs to Japan in 2005 – an analysis of](#)  
 533 [import certificates. J Clin Pharm Ther 2008;33\(5\):545-52.](#)

534 29. [Eisai. Withdrawal of approval for manufacture and sale of a therapeutic agent for](#)  
 535 [obesity in Japan KES524. Tokyo: Eisai Co., Ltd.; 2010 \[cited 7 March 2010\]; Available](#)  
 536 [from: http://www.eisai.co.jp/news/news201057.html.](#)

Formatted: Hyperlink, Font: Century, 10 pt

Formatted: Font: Century, 10 pt

537 30. [E. deKieffer D. The Internet and the Globalization of Counterfeit Drugs. Journal of](#)  
 538 [Pharmacy Practice 2006 June 1, 2006;19\(3\):171-7.](#)

539 31. [Jackson G. Faking it: the dangers of counterfeit medicine on the internet. Int J Clin](#)  
 540 [Pract 2009;63\(2\):181.](#)

541 32. [Bogenschutz MP. Drugs on the Internet. Am J Psychiatry 2001 December 1,](#)  
 542 [2001;158\(12\):2094-a-5.](#)

543 33. [MHLW. Warning on health hazard due to counterfeit medicines. Tokyo: Ministry](#)  
 544 [of Health and Labour Welfare; 2011 \[cited October 4 2011\]; Available from:](#)

545 <http://www.mhlw.go.jp/stf/houdou/2r9852000001agwf-att/2r9852000001ah0e.pdf>.

Formatted: Hyperlink, Font: Century, 10 pt

Formatted: Font: Century, 10 pt

546 34. [Pfizer. Result of joint investigation done by four manufacturers: Approximately](#)  
 547 [60% of ED treatment medicines are counterfeits on the Internet. Tokyo 2009; Available](#)  
 548 [from: http://www.pfizer.co.jp/pfizer/company/press/2009/2009\\_12\\_02.html.](#)

Formatted: Font: Century, 10 pt, French (France)

Field Code Changed

Formatted: Hyperlink, Font: Century, 10 pt, French (France)

Formatted: Font: Century, 10 pt, French (France)

- 1  
2  
3  
4  
5  
6  
7  
8  
9 549 [35. Kimura K, Honma T, Tanimoto T, et al. Public Health Implication of Personal](#)  
10  
11 [Import of Medicines through Internet Brokers \(2\): Buying Anti-obesity Agents On-line. J](#)  
12  
13 [Health Care & Society 2011;21:55-67.](#)  
14 551  
15  
16 552 [36. Specified Commercial Transaction Law to Regulate Mail-order Business. \(1976\).](#)  
17  
18  
19 553 [37. Aka E, Legris C, Tanimoto T, et al. Counterfeit medicine detection by authenticity](#)  
20  
21 [investigation: A pilot study in the street market of Côte d'Ivoire. Japanese Journal of Social](#)  
22 554  
23 [Pharmacy 2005;24\(2\):7-16.](#)  
24 555  
25  
26 556 [38. MHLW. Pharmaceutical affairs law, Japan. Tokyo: Ministry of Health and Labour](#)  
27  
28 [Welfare; 2011 \[cited October 4 2011\]; Available from:](#)  
29 557  
30  
31 <http://www.houko.com/00/01/S35/145.HTM>  
32 558  
33  
34 559 [39. Nazeri A, Massumi A, Wilson JM, et al. Arrhythmogenicity of weight-loss](#)  
35  
36 [supplements marketed on the Internet. Heart Rhythm 2009;6\(5\):658-62.](#)  
37 560  
38  
39 561 [40. Veronin MA, Youan B-BC. Magic Bullet Gone Astray: Medications and the Internet.](#)  
40  
41 [Science 2004 July 23, 2004;305\(5683\):481.](#)  
42 562  
43  
44 563 [41. Martin-Facklam M, Kostrzewa M, Schubert F, et al. Quality markers of drug](#)  
45  
46 [information on the internet: an evaluation of sites about St. John's Wort. The American](#)  
47 564  
48 [Journal of Medicine 2002;113\(9\):740-5.](#)  
49 565  
50  
51 566 [42. Westenberger BJ, Ellison CD, Fussner AS, et al. Quality assessment of internet](#)  
52  
53  
54  
55  
56  
57  
58  
59  
60

Formatted: Font: Century, 10 pt

Formatted: Hyperlink, Font: Century, 10 pt

Formatted: Font: Century, 10 pt

- 1  
2  
3  
4  
5  
6  
7  
8  
9 567 [pharmaceutical products using traditional and non-traditional analytical techniques. Int J](#)  
10  
11 568 [Pharm 2005;306\(1-2\):56-70.](#)  
12  
13  
14 569 [43. Orizio G, Rubinelli S, Schulz PJ, et al. "Save 30% if you buy today". Online](#)  
15  
16 [pharmacies and the enhancement of peripheral thinking in consumers. Pharmacoepidemiol](#)  
17 570  
18 [Drug Saf 2010;19\(9\):970-6.](#)  
19 571  
20  
21 572 [44. Orizio G, Merla A, Schulz PJ, et al. Quality of Online Pharmacies and Websites](#)  
22 [Selling Prescription Drugs: A Systematic Review. Journal of Medical Internet Research](#)  
23 573  
24 [2011;13\(3\):e74.](#)  
25 574  
26  
27 575 [45. Tziomalos K, Krassas GE, Tzotzas T. The use of sibutramine in the management of](#)  
28 [obesity and related disorders: An update. Vascular Health and Risk Management](#)  
29 576  
30 [2009;5:441-52.](#)  
31 577  
32  
33 578 [46. EMEA. European Medicines Agency recommends suspension of marketing](#)  
34 [authorisation for Sibutramine. London: European Medicines Agency; 2010 \[updated](#)  
35 579  
36 [January 21, 2010; cited June 9, 2011\]; Available from:](#)  
37 580  
38 [http://www.ema.europa.eu/ema/index.jsp?curl=pages/news\\_and\\_events/news/2010/01/news](#)  
39 581  
40 [detail\\_000985.jsp&curl=pages/news\\_and\\_events/news/2010/01/news](#)  
41 582  
42 [detail\\_000985.jsp&curl=pages/news\\_and\\_events/news/2010/01/news](#)  
43 583  
44 [8004d5c1.](#)  
45 584  
46  
47 584 [47. EMEA. European Medicines Agency recommends first switch from prescription](#)  
48  
49  
50  
51  
52  
53  
54  
55  
56  
57  
58  
59  
60

Formatted: Hyperlink, Font: Century, 10 pt

Formatted: Font: Century, 10 pt



1  
2  
3  
4  
5  
6  
7  
8  
9 585 [only to non-prescription for a centrally authorised medicine. Doc. Ref.](#)

10  
11 586 [EMA/CHMP/493770/2008. 2008 \[cited June 24 2011\]; Available from:](#)

12  
13  
14 587 [http://www.ema.europa.eu/ema/index.jsp?curl=pages/news\\_and\\_events/news/2009/11/news](http://www.ema.europa.eu/ema/index.jsp?curl=pages/news_and_events/news/2009/11/news)

Formatted: Hyperlink, Font: Century, 10 pt

15  
16  
17 588 [detail\\_000256.jsp&murl=menus/news\\_and\\_events/news\\_and\\_events.jsp&mid=WC0b01ac05](#)

18  
19 589 [8004d5c1&jsenabled=true.](#)

Formatted: Font: Century, 10 pt

20  
21  
22 590 [48. Weidmann A, Cunningham S, Gray G, et al. Over-the-counter orlistat: early](#)

23  
24 591 [experiences, views and attitudes of community pharmacists in Great Britain. International](#)

25  
26  
27 592 [Journal of Clinical Pharmacy 2011;1-7.](#)

28  
29 593 [49. Alsheikh-Ali AA, Karas RH. Safety of Lovastatin/Extended Release Niacin](#)

30  
31  
32 594 [Compared With Lovastatin Alone, Atorvastatin Alone, Pravastatin Alone, and Simvastatin](#)

33  
34 595 [Alone \(from the United States Food and Drug Administration Adverse Event Reporting](#)

35  
36  
37 596 [System\). The American journal of cardiology 2007;99\(3\):379-81.](#)

38  
39 597 [50. Calza L. Long-term use of rosuvastatin: a critical risk benefit appraisal and](#)

40  
41  
42 598 [comparison with other antihyperlipidemics. Drug, Healthcare and Patient Safety](#)

43  
44  
45 599 [2009;1:25-33.](#)

46  
47 600 [51. Perrio MJ, Wilton LV, Shakir SAW. The Safety Profiles of Orlistat and Sibutramine:](#)

48  
49  
50 601 [Results of Prescription-Event Monitoring Studies in England. Obesity 2007;15\(11\):2712-22.](#)

51  
52  
53 602 [52. EMA. European Medicines Agency recommends withdrawal of benfluorex from](#)

603 [the market in European Union. London: European Medicines Agency; 2009 \[updated](#)

604 [December 18, 2009; cited June 9, 2011\]; Available from:](#)

605 [http://www.ema.europa.eu/ema/index.jsp?curl=pages/news\\_and\\_events/news/2010/01/news](http://www.ema.europa.eu/ema/index.jsp?curl=pages/news_and_events/news/2010/01/news_detail_000977.jsp&murl=menus/news_and_events/news_and_events.jsp&mid=WC0b01ac05)

**Formatted:** Hyperlink, Font: Century, 10 pt

606 [detail\\_000977.jsp&murl=menus/news\\_and\\_events/news\\_and\\_events.jsp&mid=WC0b01ac05](http://www.ema.europa.eu/ema/index.jsp?curl=pages/news_and_events/news/2010/01/news_detail_000977.jsp&murl=menus/news_and_events/news_and_events.jsp&mid=WC0b01ac05)

607 [8004d5c1&jsenabled=true.](http://www.ema.europa.eu/ema/index.jsp?curl=pages/news_and_events/news/2010/01/news_detail_000977.jsp&murl=menus/news_and_events/news_and_events.jsp&mid=WC0b01ac05)

**Formatted:** Font: Century, 10 pt

608 [53. EMEA. Public statement on Acomplia: withdrawal of the marketing authorisation](#)

609 [in the European Union. London: European Medicines Agency; 2009 \[updated January 30,](#)

610 [2009; cited June 9, 2011\]; Available from:](#)

611 [http://www.ema.europa.eu/ema/index.jsp?curl=pages/news\\_and\\_events/news/2009/11/news\\_det](http://www.ema.europa.eu/ema/index.jsp?curl=pages/news_and_events/news/2009/11/news_detail_000126.jsp&murl=menus/news_and_events/news_and_events.jsp&mid=WC0b01ac058004)

**Formatted:** Hyperlink

612 [ail\\_000126.jsp&murl=menus/news\\_and\\_events/news\\_and\\_events.jsp&mid=WC0b01ac058004](http://www.ema.europa.eu/ema/index.jsp?curl=pages/news_and_events/news/2009/11/news_detail_000126.jsp&murl=menus/news_and_events/news_and_events.jsp&mid=WC0b01ac058004)

613 [d5c1.](http://www.ema.europa.eu/ema/index.jsp?curl=pages/news_and_events/news/2009/11/news_detail_000126.jsp&murl=menus/news_and_events/news_and_events.jsp&mid=WC0b01ac058004)

**Formatted:** Font: Century, 10 pt

614 [54. Khan M, Okumura J, Sovannarith T, et al. Counterfeit Medicines in](#)

**Formatted:** Font: Century, 10 pt, Swedish (Sweden)

615 [Cambodia—Possible Causes. Pharm Res 2011;28\(3\):484-9.](#)

**Formatted:** Font: Century, 10 pt

616 [55. FDA Warns Consumers about Counterfeit Alli \[database on the Internet\]. U.S.](#)

617 [Food and Drug Administration. 2010 \[cited 3 October 2011\]. Available from:](#)

618 [http://www.fda.gov/NewsEvents/Newsroom/PressAnnouncements/ucm197857.htm.](http://www.fda.gov/NewsEvents/Newsroom/PressAnnouncements/ucm197857.htm)

**Formatted:** Hyperlink, Font: Century, 10 pt

**Formatted:** Font: Century, 10 pt

619 [56. UPDATED Public Health Alert: Counterfeit Alli containing sibutramine \[database](#)

620 [on the Internet\]. U.S. Food and Drug Administration. 2010 \[cited 3 October 2011\].](#)

621 Available from:

622 [http://www.fda.gov/Drugs/DrugSafety/PostmarketDrugSafetyInformationforPatientsandPro](http://www.fda.gov/Drugs/DrugSafety/PostmarketDrugSafetyInformationforPatientsandProviders/ucm198519.htm)  
623 [viders/ucm198519.htm](http://www.fda.gov/Drugs/DrugSafety/PostmarketDrugSafetyInformationforPatientsandProviders/ucm198519.htm)

Formatted: Hyperlink, Font: Century, 10 pt

Formatted: Font: Century, 10 pt

624 57. Dondorp AM, Newton PN, Mayxay M, et al. Fake antimalarials in Southeast Asia

625 are a major impediment to malaria control: multinational cross-sectional survey on the

626 prevalence of fake antimalarials. Trop Med Int Health 2004;9(12):1241-6.

627 58. Khan MH, Okumura J, Sovannarith T, et al. Prevalence of counterfeit

628 anti-helminthic medicines: a cross-sectional survey in Cambodia (DOI:

629 [10.1111/j.1365-3156.2010.02494.x](https://doi.org/10.1111/j.1365-3156.2010.02494.x)). Trop Med Int Health 2010 May 15(5):639-44.

630 59. Lineberry TW, Bostwick JM. Taking the Physician Out of "Physician Shopping": A

631 Case Series of Clinical Problems Associated With Internet Purchases of Medication. Mayo

632 Clin Proc 2004 August 1, 2004;79(8):1031-4.

633 60. MHLW. Pharmaceutical affairs law, Japan. Tokyo: Ministry of Health and Labour

634 Welfare; 1961 [cited October 4 2011]; Available from:

635 <http://www.houko.com/00/01/S35/145.HTM>

Formatted: Hyperlink, Font: Century, 10 pt

Formatted: Font: Century, 10 pt

636 61. Mackey TK, Liang BA. Promoting online drug safety: Using public-private

637 partnerships to deter illicit online drug sales. Journal of Commercial Biotechnology

638 2011;17(3):266-71.

- 1  
2  
3  
4  
5  
6  
7  
8  
9 639 [62. Cockburn R, Newton PN, Agyarko EK, et al. The Global Threat of Counterfeit](#)  
10 [Drugs: Why Industry and Governments Must Communicate the Dangers. PLoS Med](#)  
11 [2005;2\(4\):e100.](#)  
12  
13  
14 641  
15  
16 642  
17  
18  
19 643 [1. Madden M. America's Online Pursuits: The changing picture of who's online and](#)  
20 [what they do. Washington D. C.: Pew Internet 22 December 2003.](#)  
21  
22 644  
23  
24 645 [2. Atkinson NL, Saperstein SL, Pleis J. Using the Internet for Health-Related](#)  
25 [Activities: Findings From a National Probability Sample. J Med Internet Res 2009;11\(1\):e4.](#)  
26  
27 646  
28  
29 647 [3. Araki R, Okumura J, Akazawa M, et al. A survey on the awareness of consumers on](#)  
30 [their personal import of medicines from public health view point. Japanese Journal of Social](#)  
31 [Pharmacy 2010;28\(3\):134-5.](#)  
32  
33 648  
34  
35 649  
36  
37 650 [4. WHO. Medicines: counterfeit medicines. Geneva: World Health Organization;](#)  
38 [2010 \[cited 8 March 2010\]; Fact sheet No. 275\]. Available from:](#)  
39  
40 651 [http://www.who.int/mediacentre/factsheets/fs275/en/index.html.](http://www.who.int/mediacentre/factsheets/fs275/en/index.html)  
41  
42 652  
43  
44 653 [5. WHO. 2008-2013 Action Plan for the Global Strategy for the Prevention and](#)  
45 [Control of Noncommunicable Diseases. Organization WH, editor. Geneva: World Health](#)  
46  
47 654 [Organization; 2008.](#)  
48  
49 655  
50  
51 656 [6. James WPT. The epidemiology of obesity: the size of the problem. Blackwell](#)  
52  
53  
54  
55  
56  
57  
58  
59  
60

- 1  
2  
3  
4  
5  
6  
7  
8  
9 657 ~~Publishing Ltd; 2008. p. 336-52.~~
- 10  
11 658 ~~7. ——— Moreno LA, Pigeot I, Ahrens W, et al. Prevalence of Overweight and Obesity in~~
- 12  
13  
14 659 ~~Japan. — Epidemiology of Obesity in Children and Adolescents: Springer New York; 2011. p-~~
- 15  
16 660 ~~153-62.~~
- 17  
18  
19 661 ~~8. ——— Snow V, Barry P, Fitterman N, et al. Pharmacologic and Surgical Management of~~
- 20  
21 662 ~~Obesity in Primary Care: A Clinical Practice Guideline from the American College of~~
- 22  
23  
24 663 ~~Physicians. Ann Intern Med, 2005;142(7):525-31.~~
- 25  
26  
27 664 ~~9. ——— Lowes R, Waknine Y. FDA Announces Sibutramine Has Been Withdrawn From the~~
- 28  
29 665 ~~Market. Medscape Education [serial on the Internet]. 2010 [cited 25 October 2011];-~~
- 30  
31 666 ~~Available from: <http://www.medscape.org/viewarticle/730515>.~~
- 32  
33  
34 667 ~~10. ——— FDA. FDA Drug Safety Communication: FDA Recommends Against the Continued-~~
- 35  
36 668 ~~Use of Meridia (sibutramine). — Rockville, MD 2010 [updated 8 October 2010; cited 2011, 25-~~
- 37  
38  
39 669 ~~October]; Available from: <http://www.fda.gov/Drugs/DrugSafety/ucm228746.htm>.~~
- 40  
41  
42 670 ~~11. ——— MHLW. Authorization status of drugs in Japan. — Tokyo: Ministry of Health and~~
- 43  
44 671 ~~Labour Welfare; 2011 [cited 2011 June 30]; Available from:-~~
- 45  
46 672 ~~[http://www.info.pmda.go.jp/psearch/html/menu\\_tenpu\\_base.html](http://www.info.pmda.go.jp/psearch/html/menu_tenpu_base.html).~~
- 47  
48  
49 673 ~~12. ——— Tsuji K, Tsutani K. Personal imports of drugs to Japan in 2005 — an analysis of~~
- 50  
51 674 ~~import certificates. J Clin Pharm Ther 2008;33(5):545-52.~~
- 52  
53  
54  
55  
56  
57  
58  
59  
60

- 1  
2  
3  
4  
5  
6  
7  
8  
9 675 13. ——— E. deKieffer D. The Internet and the Globalization of Counterfeit Drugs. *Journal of*  
10  
11 676 *Pharmacy Practice*, 2006;19(3):171-7.
- 12  
13  
14 677 14. ——— Jackson G. Faking it: the dangers of counterfeit medicine on the internet. *Int J Clin*  
15  
16 678 *Pract* 2009;63(2):181.
- 17  
18  
19 679 15. ——— Bogenschutz MP. Drugs on the Internet. *Am J Psychiatry*, 2001;158(12):2094-a-5.
- 20  
21  
22 680 16. ——— MHLW. Warning on health hazard due to counterfeit medicines. —Tokyo: Ministry  
23  
24 681 of Health and Labour Welfare; —2011 [cited 4 October 2011]; Available from:  
25  
26 682 <http://www.mhlw.go.jp/stf/houdou/2r9852000001agwf-att/2r9852000001ah0e.pdf>.
- 27  
28  
29 683 17. ——— Aka E, Legris C, Tanimoto T, et al. Counterfeit medicine detection by authenticity-  
30  
31 684 investigation: A pilot study in the street market of Côte-d'Ivoire. *Japanese Journal of Social*  
32  
33 685 *Pharmacy* 2005;24(2):7-16.
- 34  
35  
36  
37 686 18. ——— WHO. Counterfeit Drugs: Guidelines for the development of measures to combat  
38  
39 687 counterfeit drugs. Geneva, Switzerland: Department of Essential Drugs and Other  
40  
41 688 Medicines, World Health Organization 1999. Report No.: (WHO/EDM/QSM/99.1).
- 42  
43  
44 689 19. ——— MHLW. Pharmaceutical affairs law, Japan. —Tokyo: Ministry of Health and Labour  
45  
46 690 Welfare; 2011 [cited 4 October 2011]; Available from:  
47  
48 691 <http://www.houko.com/00/01/S35/145.HTM>.
- 49  
50  
51  
52 692 20. ——— Specified Commercial Transaction Law to Regulate Mail-order Business, (1976).
- 53  
54  
55  
56  
57  
58  
59  
60

- 1  
2  
3  
4  
5  
6  
7  
8  
9 693 ~~21. Nazeri A, Massumi A, Wilson JM, et al. Arrhythmogenicity of weight-loss~~  
10  
11 694 ~~supplements marketed on the Internet. Heart Rhythm 2009;6(5):658-62.~~  
12  
13  
14 695 ~~22. Kimura K, Honma T, Tanimoto T, et al. Public Health Implication of Personal~~  
15  
16 696 ~~Import of Medicines through Internet Brokers (2): Buying Anti-obesity Agents On-line. J~~  
17  
18 697 ~~Health Care & Society 2011;21:55-67.~~  
19  
20  
21 698 ~~23. Veronin MA, Youan B-BC. Magic Bullet Gone Astray: Medications and the Internet.~~  
22  
23 699 ~~Science, 2004;305(5683):481.~~  
24  
25  
26  
27 700 ~~24. Martin-Facklam M, Kostrzewa M, Schubert F, et al. Quality markers of drug~~  
28  
29 701 ~~information on the internet: an evaluation of sites about St. John's Wort. The American~~  
30  
31 702 ~~Journal of Medicine 2002;113(9):740-5.~~  
32  
33  
34 703 ~~25. Westenberger BJ, Ellison CD, Fussner AS, et al. Quality assessment of internet~~  
35  
36 704 ~~pharmaceutical products using traditional and non-traditional analytical techniques. Int J~~  
37  
38 705 ~~Pharm 2005;306(1-2):56-70.~~  
39  
40  
41 706 ~~26. Tziomalos K, Krassas GE, Tzotzas T. The use of sibutramine in the management of~~  
42  
43 707 ~~obesity and related disorders: An update. Vascular Health and Risk Management~~  
44  
45 708 ~~2009;5:441-52.~~  
46  
47  
48 709 ~~27. EMEA. European Medicines Agency recommends suspension of marketing~~  
49  
50 710 ~~authorisation for Sibutramine. London: European Medicines Agency; 2010 [updated 21-~~  
51  
52  
53  
54  
55  
56  
57  
58  
59  
60

Formatted: English (U.S.)

1  
2  
3  
4  
5  
6  
7  
8  
9 711 ~~January 2010; cited 9 June 2011]; Available from:~~  
10  
11 712 ~~[http://www.ema.europa.eu/ema/index.jsp?curl=pages/news\\_and\\_events/news/2010/01/news\\_](http://www.ema.europa.eu/ema/index.jsp?curl=pages/news_and_events/news/2010/01/news_)~~  
12  
13 713 ~~[detail\\_000985.jsp&menu=menus/news\\_and\\_events/news\\_and\\_events.jsp&mid=WC0b01ac05](detail_000985.jsp&menu=menus/news_and_events/news_and_events.jsp&mid=WC0b01ac05)~~  
14  
15  
16 714 ~~<8004d5e1>~~  
17  
18  
19 715 ~~28. EMEA. European Medicines Agency recommends first switch from prescription~~  
20  
21  
22 716 ~~only to non-prescription for a centrally authorised medicine. Doc. Ref.~~  
23  
24 717 ~~EMEA/CHMP/493770/2008. 2008 [cited 24 June 2011]; Available from:~~  
25  
26  
27 718 ~~[http://www.ema.europa.eu/ema/index.jsp?curl=pages/news\\_and\\_events/news/2009/11/news\\_](http://www.ema.europa.eu/ema/index.jsp?curl=pages/news_and_events/news/2009/11/news_)~~  
28  
29 719 ~~[detail\\_000256.jsp&menu=menus/news\\_and\\_events/news\\_and\\_events.jsp&mid=WC0b01ac05](detail_000256.jsp&menu=menus/news_and_events/news_and_events.jsp&mid=WC0b01ac05)~~  
30  
31  
32 720 ~~<8004d5e1&jsenabled=true>~~  
33  
34  
35 721 ~~29. Weidmann A, Cunningham S, Gray C, et al. Over-the-counter orlistat: early~~  
36  
37 722 ~~experiences, views and attitudes of community pharmacists in Great Britain. International~~  
38  
39 723 ~~Journal of Clinical Pharmacy 2011;1-7.~~  
40  
41  
42 724 ~~30. Alsheikh-Ali AA, Karas RH. Safety of Lovastatin/Extended Release Niacin~~  
43  
44 725 ~~Compared With Lovastatin Alone, Atorvastatin Alone, Pravastatin Alone, and Simvastatin~~  
45  
46 726 ~~Alone (from the United States Food and Drug Administration Adverse Event Reporting~~  
47  
48 727 ~~System). The American journal of cardiology 2007;99(3):379-81.~~  
49  
50  
51  
52 728 ~~31. Calza L. Long-term use of rosuvastatin: a critical risk benefit appraisal and~~  
53  
54  
55  
56  
57  
58  
59  
60



- 1  
2  
3  
4  
5  
6  
7  
8  
9 729 ~~comparison with other antihyperlipidemics. Drug, Healthcare and Patient Safety~~  
10  
11 730 ~~2009;1:25-33.~~  
12  
13  
14 731 ~~32. ——— Perrio MJ, Wilton LV, Shakir SAW. The Safety Profiles of Orlistat and Sibutramine:~~  
15  
16 ~~Results of Prescription-Event Monitoring Studies in England. Obesity 2007;15(11):2712-22.~~  
17 732  
18  
19 733 ~~33. ——— EMEA. European Medicines Agency recommends withdrawal of benfluorex from~~  
20  
21 ~~the market in European Union. London: European Medicines Agency; 2009 [updated 18~~  
22 734  
23 ~~December 2009; cited 9 June 2011]; Available from:~~  
24 735  
25 ~~[http://www.ema.europa.eu/ema/index.jsp?curl=pages/news\\_and\\_events/news/2010/01/news\\_](http://www.ema.europa.eu/ema/index.jsp?curl=pages/news_and_events/news/2010/01/news_)~~  
26 736  
27 ~~[detail\\_000977.jsp&curl=pages/news\\_and\\_events/news\\_and\\_events.jsp&mid=WC0b01ac05](http://www.ema.europa.eu/ema/index.jsp?curl=pages/news_and_events/news/2010/01/news_)~~  
28 737  
29 ~~[8004d5e1&jsenabled=true.](http://www.ema.europa.eu/ema/index.jsp?curl=pages/news_and_events/news/2010/01/news_)~~  
30 738  
31  
32  
33  
34 739 ~~34. ——— Khan M, Okumura J, Sovannarith T, et al. Counterfeit Medicines in~~  
35  
36 ~~Cambodia — Possible Causes. Pharm Res 2011;28(3):484-9.~~  
37 740  
38  
39 741 ~~35. ——— FDA Warns Consumers about Counterfeit Alli [database on the Internet]. U.S.~~  
40  
41 ~~Food and Drug Administration. 2010 [cited 3 October 2011]. Available from:~~  
42 742  
43 ~~<http://www.fda.gov/NewsEvents/Newsroom/PressAnnouncements/ucm197857.htm>.~~  
44 743  
45  
46 744 ~~36. ——— UPDATED Public Health Alert: Counterfeit Alli containing sibutramine [database~~  
47  
48 ~~on the Internet]. U.S. Food and Drug Administration. 2010 [cited 3 October 2011]. Available~~  
49 745  
50  
51 ~~from:~~  
52 746  
53  
54  
55  
56  
57  
58  
59  
60

Formatted: English (U.S.)

1  
2  
3  
4  
5  
6  
7  
8  
9 747 [http://www.fda.gov/Drugs/DrugSafety/PostmarketDrugSafetyInformationforPatientsandPro](http://www.fda.gov/Drugs/DrugSafety/PostmarketDrugSafetyInformationforPatientsandProviders/ucm108519.htm)  
10  
11 748 [viders/ucm108519.htm](http://www.fda.gov/Drugs/DrugSafety/PostmarketDrugSafetyInformationforPatientsandProviders/ucm108519.htm).

12  
13  
14 749 37. ——— Newton PN, Fernández FM, Plançon A, et al. A Collaborative Epidemiological  
15  
16 750 Investigation into the Criminal Fake Artesunate Trade in South East Asia. PLoS Med  
17  
18 751 2008;5(2):e32.

19  
20  
21 752 38. ——— Dondorp AM, Newton PN, Mayxay M, et al. Fake antimalarials in Southeast Asia  
22  
23 753 are a major impediment to malaria control: multinational cross-sectional survey on the  
24  
25 754 prevalence of fake antimalarials. Trop Med Int Health 2004;9(12):1241-6.

26  
27  
28  
29 755 39. ——— Khan MH, Okumura J, Sovannarith T, et al. Prevalence of counterfeit  
30  
31 756 anti-helminthic medicines: a cross-sectional survey in Cambodia. Trop Med Int Health 2010  
32  
33 757 May 15(5):639-44. DOI: 10.1111/j.1365-3156.2010.02494.x

34  
35  
36  
37 758 40. ——— Lineberry TW, Bestwick JM. Taking the Physician Out of "Physician Shopping": A  
38  
39 759 Case Series of Clinical Problems Associated With Internet Purchases of Medication. Mayo  
40  
41 760 Clin Proc 2004;79(8):1031-4.

42  
43  
44  
45 761

46  
47 762

48  
49 763

50  
51 764

Formatted: English (U.S.)

1  
2  
3  
4  
5  
6  
7  
8  
9  
10  
11  
12  
13  
14  
15  
16  
17  
18  
19  
20  
21  
22  
23  
24  
25  
26  
27  
28  
29  
30  
31  
32  
33  
34  
35  
36  
37  
38  
39  
40  
41  
42  
43  
44  
45  
46  
47  
48  
49  
50  
51  
52  
53  
54  
55  
56  
57  
58  
59  
60

765

766

For peer review only





Figure 1: Chromatograms of the reference standard of orlistat and counterfeit samples  
254x190mm (96 x 96 DPI)

ew only

1  
2  
3  
4  
5  
6  
7  
8  
9  
10  
11  
12  
13  
14  
15  
16  
17  
18  
19  
20  
21  
22  
23  
24  
25  
26  
27  
28  
29  
30  
31  
32  
33  
34  
35  
36  
37  
38  
39  
40  
41  
42  
43  
44  
45  
46  
47  
48  
49  
50  
51  
52  
53  
54  
55  
56  
57  
58  
59  
60

1  
2  
3  
4  
5  
6  
7  
8  
9  
10  
11  
12  
13  
14  
15  
16  
17  
18  
19  
20  
21  
22  
23  
24  
25  
26  
27  
28  
29  
30  
31  
32  
33  
34  
35  
36  
37  
38  
39  
40  
41  
42  
43  
44  
45  
46  
47  
48  
49  
50  
51  
52  
53  
54  
55  
56  
57  
58  
59  
60

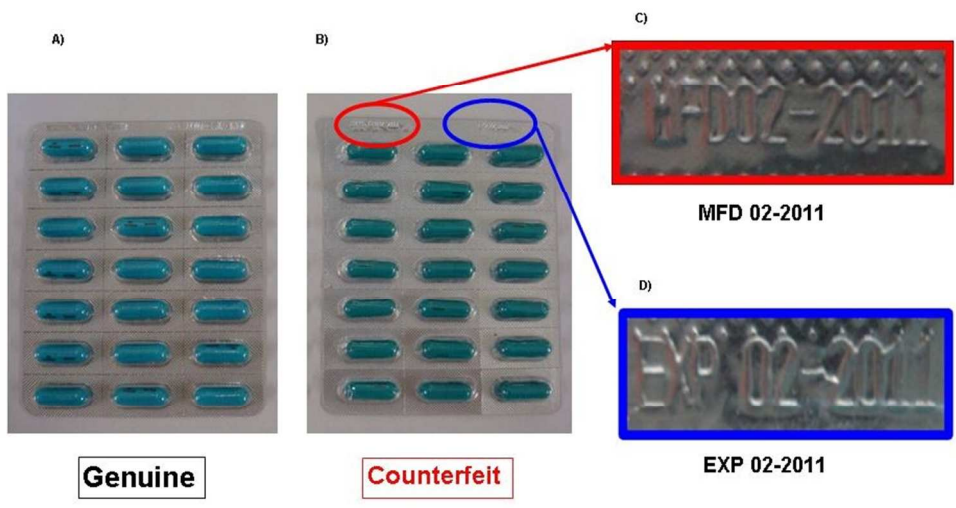

Figure 2. Front of blister: A) Genuine sample, B) Counterfeit sample, C) Manufacturing date of counterfeit sample (MFD 02-2011), D) Expiration date of counterfeit sample (EXP 02-2011)  
254x190mm (96 x 96 DPI)

ew only



Figure 3. Reverse side of blister: A) Logo of genuine sample, B) Logo of counterfeit sample  
254x190mm (96 x 96 DPI)

STROBE 2007 (v4) Statement—Checklist of items that should be included in reports of *cross-sectional studies*

| Section/Topic                | Item # | Recommendation                                                                                                                                                                       | Reported on page # |
|------------------------------|--------|--------------------------------------------------------------------------------------------------------------------------------------------------------------------------------------|--------------------|
| Title and abstract           | 1      | (a) Indicate the study's design with a commonly used term in the title or the abstract                                                                                               | 1                  |
|                              |        | (b) Provide in the abstract an informative and balanced summary of what was done and what was found                                                                                  | 2-3                |
| <b>Introduction</b>          |        |                                                                                                                                                                                      |                    |
| Background/rationale         | 2      | Explain the scientific background and rationale for the investigation being reported                                                                                                 | 5-6                |
| Objectives                   | 3      | State specific objectives, including any prespecified hypotheses                                                                                                                     | 6                  |
| <b>Methods</b>               |        |                                                                                                                                                                                      |                    |
| Study design                 | 4      | Present key elements of study design early in the paper                                                                                                                              | 7                  |
| Setting                      | 5      | Describe the setting, locations, and relevant dates, including periods of recruitment, exposure, follow-up, and data collection                                                      | 7                  |
| Participants                 | 6      | (a) Give the eligibility criteria, and the sources and methods of selection of participants                                                                                          | 7-8                |
| Variables                    | 7      | Clearly define all outcomes, exposures, predictors, potential confounders, and effect modifiers. Give diagnostic criteria, if applicable                                             | 8-9                |
| Data sources/<br>measurement | 8*     | For each variable of interest, give sources of data and details of methods of assessment (measurement). Describe comparability of assessment methods if there is more than one group | 8                  |
| Bias                         | 9      | Describe any efforts to address potential sources of bias                                                                                                                            | N.A.               |
| Study size                   | 10     | Explain how the study size was arrived at                                                                                                                                            | 7                  |
| Quantitative variables       | 11     | Explain how quantitative variables were handled in the analyses. If applicable, describe which groupings were chosen and why                                                         | 8-10               |
| Statistical methods          | 12     | (a) Describe all statistical methods, including those used to control for confounding                                                                                                | 11                 |
|                              |        | (b) Describe any methods used to examine subgroups and interactions                                                                                                                  | N.A.               |
|                              |        | (c) Explain how missing data were addressed                                                                                                                                          | N.A.               |
|                              |        | (d) If applicable, describe analytical methods taking account of sampling strategy                                                                                                   | N.A.               |
|                              |        | (e) Describe any sensitivity analyses                                                                                                                                                | N.A.               |
| <b>Results</b>               |        |                                                                                                                                                                                      |                    |

|                          |     |                                                                                                                                                                                                              |       |
|--------------------------|-----|--------------------------------------------------------------------------------------------------------------------------------------------------------------------------------------------------------------|-------|
| Participants             | 13* | (a) Report numbers of individuals at each stage of study—eg numbers potentially eligible, examined for eligibility, confirmed eligible, included in the study, completing follow-up, and analysed            | 11-13 |
|                          |     | (b) Give reasons for non-participation at each stage                                                                                                                                                         | 11-13 |
|                          |     | (c) Consider use of a flow diagram                                                                                                                                                                           |       |
| Descriptive data         | 14* | (a) Give characteristics of study participants (eg demographic, clinical, social) and information on exposures and potential confounders                                                                     | 13-14 |
|                          |     | (b) Indicate number of participants with missing data for each variable of interest                                                                                                                          | 13-14 |
| Outcome data             | 15* | Report numbers of outcome events or summary measures                                                                                                                                                         | 14-16 |
| Main results             | 16  | (a) Give unadjusted estimates and, if applicable, confounder-adjusted estimates and their precision (eg, 95% confidence interval). Make clear which confounders were adjusted for and why they were included | N.A.  |
|                          |     | (b) Report category boundaries when continuous variables were categorized                                                                                                                                    | N.A.  |
|                          |     | (c) If relevant, consider translating estimates of relative risk into absolute risk for a meaningful time period                                                                                             | N.A.  |
| Other analyses           | 17  | Report other analyses done—eg analyses of subgroups and interactions, and sensitivity analyses                                                                                                               | 14-16 |
| <b>Discussion</b>        |     |                                                                                                                                                                                                              |       |
| Key results              | 18  | Summarise key results with reference to study objectives                                                                                                                                                     | 17-19 |
| Limitations              | 19  | Discuss limitations of the study, taking into account sources of potential bias or imprecision. Discuss both direction and magnitude of any potential bias                                                   | 19    |
| Interpretation           | 20  | Give a cautious overall interpretation of results considering objectives, limitations, multiplicity of analyses, results from similar studies, and other relevant evidence                                   | 17-19 |
| Generalisability         | 21  | Discuss the generalisability (external validity) of the study results                                                                                                                                        | 19    |
| <b>Other information</b> |     |                                                                                                                                                                                                              |       |
| Funding                  | 22  | Give the source of funding and the role of the funders for the present study and, if applicable, for the original study on which the present article is based                                                | 20    |

\*Give information separately for cases and controls in case-control studies and, if applicable, for exposed and unexposed groups in cohort and cross-sectional studies.

**Note:** An Explanation and Elaboration article discusses each checklist item and gives methodological background and published examples of transparent reporting. The STROBE checklist is best used in conjunction with this article (freely available on the Web sites of PLoS Medicine at <http://www.plosmedicine.org/>, Annals of Internal Medicine at <http://www.annals.org/>, and Epidemiology at <http://www.epidem.com/>). Information on the STROBE Initiative is available at [www.strobe-statement.org](http://www.strobe-statement.org).
